# Supplementary material
Source: publisher site journal article supplement (https://www.degruyterbrill.com/publication/isbn/9783110734157/downloadAsset/9783110734157__02REM%20dataset.xlsx)
Supplement: Supplementary file 1 [file 9783110734157__02REM%20dataset.xlsx]

## Sheet: master
CONTEXT	ID	IDORIGIN	MOD	SOURCE1	GENRE	LENB	SOURCE2	F_NEXT	F_DOSUP	F_FORM	S_EPROOT	S_POSNEC	S_SCOPE	S_CAT	S_SOURCE	S_ACT	S_TIMEREF	S_RELMR	F_VBINF	S_HAVE	F_PROG	F_VOICE	S_SITTYPE	VB	F_SUBJEX	F_SUBJ	S_ANIM	S_AGENT	S_GEN	S_CLAUSETYPE	MAINITEM	S_CLAUSEFORM	F_POLAR	S_NEGSCOPE	S_HAB	S_COUNTF	S_HYP	P_CONTEXTEF	P_SPEECHACT	P_SPEECHACT+	P_DIRECTNESS	S_ADVSTR	F_ADVPOS	ADV
-- -- -- -- -- -- -- -- -- -- -- -- -- The final stages of U.S. health care reform legislation Re: " Dispatch health care reform bill, " Jan. 16 editorial. # The state of the health reform bill is depressing. Even the pretty liberal Denver Post said it needs to be killed - not a good sign. # We are drained by the constant sellouts to Democratic senators, unions, or special-interest groups in orde…	1	276	NEED TO	COCA:2010:NEWS	NEWS	14	Denver	vb	n	pres	root	nec	ws	gsn	circ	NA	pres	sim	presvb	NA	n	pas	dyn	KILL	n	3s	n	n	n	sub.nomcl	SAY	NA	pos	NA	n	n	n	noef	ass	ass	dir	NA	NA	NA
-- -- -- -- -- -- AT ISSUE # September call-ups fine, but their use should be restricted # What: By rule, baseball allows the expansion of rosters where teams are eligible to call up any player on their 40-man roster. Promoting players makes sense, but the daily active roster should be limited to 26 players. # When: The dam bursts Sept. 1,)%>with trickles the rest of the month, as contenders add …	2	343	SHOULD	COCA:2011:NEWS	NEWS	14	Denver	vb	NA	NA	root	nec	ws	gsn	rul	NA	pres	sim	presvb	NA	n	pas	dyn	LIMIT	n	3s	n	n	n	maincl	NA	decl	pos	NA	n	n	n	noef	ass	ass	dir	NA	NA	NA
' #' I was not,' I retorted.' I pretended to be, so you would n't fret about my staying up for you. I knew you were upset, so I worried. Margaret understands.' She nodded and raised her hands in the classic' But what can you do?' gesture. # Alan shook his head and continued.')%>And yesterday I pottered about the house, cleared out the garden shed, worked on my memoirs for a bit that sort of thing…	3	1	CAN	COCA:2014:FIC	FIC	13	Bk:DayVengeance	subjinv	NA	NA	root	pos	ws	gsp	circ	NA	pres	sim	presvb	NA	n	act	dyn	DO	n	2s	y	y	y	maincl	NA	int	pos	NA	n	n	n	noef	exp	exp	indir	NA	NA	NA
* Four basils (expensive in stores but essential in the kitchen) * 18 lettuces: six' Crisp Mint' romaine, six' Winter Density' romaine, and six' Sylvestra' butterhead The only plants I grew from seed were the Zucchinis. Hindsight is always 20/20; I should have thinned each of the zucchini hills to a single seedling, but I left)%>two in each hill. As a result, I needed to come up with creative use…	4	228	SHOULD	COCA:2009:MAG	MAG	13	MotherEarth	vb	NA	NA	root	nec	ns	subjextn	rul	n	past	sim	pfvbnc	count	n	act	dyn	THIN	n	1s	y	y	n	maincl	NA	decl	pos	NA	n	y	n	noef	ass	ass	dir	NA	NA	NA
-- and this is almost -- speaking having been a prosecutor for 14 years -- is, it helps investigators really hone in, laser in on individuals who may have access to the information about not only what Mr. Corzine did or didn't know, but other senior executives may have known or may not have known, because the focus of the testimony by the senior executives of)%>MF Global has really been focused o…	5	175	MAY	COCA:2011:SPOK	SPOK	14	PBS_NewsHour	neg.vb	NA	NA	ep	pos	ws	ep	disint	NA	pres	ant	pfvbnc	ant	n	act	st	KNOW	n	3p	y	n	n	sub.nomcl	THE INFORMATION ABOUT	NA	not	negprop	n	n	n	noef	ass	ass	dir	NA	NA	NA
' attitudes toward recreational book reading may have had some influence on adolescents' attitudes toward the practice. # The Spearman's Correlation Coefficient revealed no statistically significant relationship between adolescents' attitudes toward book reading and perceived peer group attitude toward book reading, for p =.063, and therefore the results could not be considered significant at p <…	6	466	COULD	COCA:2015:ACAD	ACAD	14	JAdolAdultLiteracy	neg.vb	NA	NA	root	pos	ws	gsp	circ	NA	past	sim	presvb	NA	n	pas	st	CONSIDER	n	3p	n	n	n	maincl	NA	decl	not	negmod	n	n	n	noef	ass	ass	dir	NA	initial	THEREFORE
Automatic Updates will eventually install the patches you need. But its Automatic Updates tend to roll out slowly, leaving your PC vulnerable during the critical time between the public release of the patch and the moment when you install it. There is no technical fix for this danger. You just have to keep up on the latest security news and visit update.microsoft.com as soon as you hear about an …	7	18	HAVE TO	COCA:2009:MAG	MAG	13	PCWorld	vb	n	pres	root	nec	ns	subjextn	circ	n	pres	sim	presvb	NA	n	act	dyn	KEEP UP	n	2s	y	y	n	maincl	NA	decl	n.adv	NA	n	n	n	noef	ass	ass	dir	NA	im	JUST
cause he woke up alla sudden and rubbed on his neck. Then he had the nerve to turn and wink at Gram-nma. I swear to God Almighty she turned around and grinned at him. # They been friends for 50 something years, but she'd married Granpa and Old Ferguson ought to remember that. This was Granpa's funeral, anyways. Ain't nobody have no business grinning and winking. # " Connie, take your feet off the…	9	203	OUGHT TO	COCA:2001:FIC	FIC	13	AfricanAmerRev	vb	n	NA	ep	nec	ws	ep	disint	NA	pres	sim	presvb	NA	n	act	st	REMEMBER	n	3s	y	n	n	maincl	NA	decl	pos	NA	n	n	n	str	exp	exp	dir	NA	NA	NA
-- come on. PERINO# Did I send an all-caps e-mail? BECKEL# No, I did. And... GUILFOYLE# Oh, I thought you screamed at me. BECKEL# And most e-mail I get starts off with " You fat commie son of a '' - - and goes from there. So why should I answer it? GUTFELD# That's your brother. PERINO# Bob, you've)%>had -- in this you had -- you said you had some theories on this? GUTFELD# I do have theories. Wel…	10	119	SHOULD	COCA:2014:SPOK	SPOK	14	Fox	subjinv	NA	NA	root	nec	ns	subjextn	circ	n	pres	sim	presvb	NA	n	act	dyn	ANSWER	n	1s	y	y	n	maincl	NA	int	pos	NA	n	n	n	noef	exp	exp	indir	NA	NA	NA
-- figured maybe a billion bucks, little more for her. NANCY-CORDES: Mm-Hm. JACK-OTTER: But I think what's kind of cool is more than a thousand Facebook employees will become millionaires. NANCY-CORDES: Wow. And how about the rest of us? Can regular people get in on this IPO? And should they buy stock when it goes published? JACK-OTTER: Sure. Those are good questions)%>. I think people really wan…	11	416	SHOULD	COCA:2012:SPOK	SPOK	14	CBS_ThisMorning	subjinv	NA	NA	root	nec	ns	subjextn	disint	n	pres	sim	presvb	NA	n	act	dyn	BUY	n	3p	y	y	y	maincl	NA	int	pos	NA	n	n	n	noef	dir	dir.ireq	dir	NA	NA	NA
-- Ginger Valente, Athens, OH I liked your article but had to switch roles in it. My wife and I both work, but I find time to do the chores while she gives the excuse of being tired. -- Scott Ryder, Salt Lake City Getting your due? I have to know what Parenting readers think: I am sickened by the trend of '' push " presents! A friend's husband bought her a ring after she gave birth. Save the mone…	12	77	HAVE TO	COCA:2007:MAG	MAG	13	Parenting	vb	n	pres	root	nec	ns	subjintn	subjint	n	pres	sim	presvb	NA	n	act	st	KNOW	n	1s	y	n	n	maincl	NA	decl	pos	NA	n	n	n	noef	dir	dir.ireq	indir	NA	NA	NA
-- Links to Reading and Writing (Wasowicz, Apel, Masterson, & Whitney, 2012), a product on which Kenn Apel receives some royalties. However, the product itself is never mentioned in the article . # 1We use the term base word for free morphemes, one-morpheme words that can stand on their own. The term root is used for a morpheme that serves)%>as the base of a word yet is not an affix. Roots typica…	13	3	CAN	COCA:2014:ACAD	ACAD	14	LangSpeechHearing	vb	NA	NA	root	pos	ns	ab	subjint	n	pres	sim	presvb	NA	n	act	st	STAND	n	3p	n	n	y	sub.relcl	NA	NA	pos	NA	n	n	n	noef	ass	ass	dir	NA	NA	NA
my wife said, half-meaning it. //' What's example No. 2?' //' You forgot to make the Cape May reservation.' // This was a little more serious.' Only because I knew you wanted to do it. You're oh for two. You have to hit a three-pointer from the top of the key.' // Susan stared at me. She really is smarter than I am, and I rely upon that.' You missed Rachel's call and did n't ask about it.' // Our…	14	269	HAVE TO	COCA:2008:NEWS	NEWS	14	NYTimes	vb	n	pres	root	nec	ns	subjextn	circ	n	pres	sim	presvb	NA	n	act	dyn	HIT	n	2s	y	y	n	maincl	NA	decl	pos	NA	n	n	n	noef	ass	ass	dir	NA	NA	NA
-- nobody -- nobody is celebrating. Nobody is throwing up the balloons, but there are people who are greatly, greatly relieved, like Liz Norden, who lost -- whose lost two sons each lost a leg . She feels justice was served. We have heard from Michael Ward. You could still see the anger. He was seething as he took the podium for a)%>few minutes. He, too, feels justice was served. There are other …	15	66	COULD	COCA:2015:SPOK	SPOK	14	PBS	adv	NA	NA	root	pos	ws	gsp	circ	NA	past	sim	presvb	NA	n	act	st	SEE	n	2s	y	n	y	maincl	NA	decl	pos	NA	n	n	n	noef	ass	ass	dir	NA	m	STILL
' overpowering war-lust is satisfied by wars with places like Iraq and Afghanistan, or because Buckeyes actually have better things to do than engage in mass murder? The best answer, I think, is the last one , but the power of the federal government is a necessity and something we may have to create at an international level before we have secure and unquestionable international peace. # A crucia…	16	21	HAVE TO	COCA:2011:ACAD	ACAD	14	Humanist	vb	n	inf	root	nec	ns	subjextn	disint	n	pres	sim	presvb	NA	n	act	dyn	CREATE	n	1p	y	y	n	sub.relcl	NA	NA	pos	NA	n	n	n	noef	ass	ass	dir	NA	NA	NA
t transferable, because other institutions didn' t recognize AI' s accreditation. " I felt defeated, " she says. " I' d wasted so much time. Other than a few good classes , most were a joke. I was horribly embarrassed. '' She knew she had to tell her parents the bad news. '' They didn' t say much , which was how I knew they were really mad. " But she made it clear she didn' t expect them to rescu…	17	418	HAVE TO	COCA:2014:MAG	MAG	13	GoodHousekeeping	vb	n	pret	root	nec	ns	subjextn	circ	n	pastsub	sim	presvb	NA	n	act	dyn	TELL	n	3s	y	y	n	sub.nomcl	KNOW	NA	pos	NA	n	n	n	noef	ass	ass	dir	NA	NA	NA
tales of prostitutes and vagrants, textual as well as visual evidence indicates that young artists themselves were the most frequent models. The Carracci provide one striking illustration. According to Carlo Cesare Malvasia: # They made a practice of posing as models for one another; Agostino prided himself in being able to adopt the exact poses and attitudes desired by Ludovico, for he believed …	18	467	BE ABLE TO	COCA:2015:ACAD	ACAD	14	ArtBulletin	vb	NA	ing	root	pos	ns	ab	subjint	n	pres	sim	presvb	NA	n	act	dyn	ADOPT	n	3s	y	y	n	sub.nomcl	PRIDE YOURSELF	NA	pos	NA	n	n	n	noef	ass	ass	dir	NA	NA	NA
- we have a world view where we believe that the - we need to put our faith in the American people, we need to put our faith in the entrepreneurs, the risk-takers who help create jobs in this country. And President Obama has a different worldview. His is that we need to put faith in government. KEVIN-MADDEN# And if you look at all of those little hits that you've compiled there, that's the big di…	20	165	NEED TO	COCA:2012:SPOK	SPOK	14	ABC	vb	n	pres	root	nec	ns	subjextn	disint	n	pres	sim	presvb	NA	n	act	dyn	PUT	n	1p	y	y	y	sub.nomcl	BE	NA	pos	NA	n	n	n	noef	ass	ass	dir	NA	NA	NA
! The way she placed her teeth on her plump lower lip to end the word " off " made me giddy in the knees. Anne was a nut. She loved attention. Her face was the face of a baby doll. She danced and sang and ran around until the nurse had to come and put her, biting and scratching with her lovely needy little fingers , in the Pack. # She said she was from Canada, but in truth, she was from Pittsburg…	21	385	HAVE TO	COCA:2000:FIC	FIC	13	NewEnglandRev	vb	n	pret	root	nec	ns	subjextn	circ	y	past	sim	presvb	NA	n	act	dyn	COME	n	3s	y	y	n	sub.advcl	UNTIL	NA	pos	NA	n	n	n	noef	ass	ass	dir	NA	NA	NA
" -- an important link between smaller asteroids and planets. # 8 JUNE 8. 2011 # As the craft approaches Jupiter, the sunlight reaching Rosetta' s solar panels dwindles to just a fraction of its strength near Earth . To preserve power (and to weather funding cuts in Europe), Rosetta must go into hibernation for the final third of its trip. The craft briefly fires)%>its thrusters, starts spinning …	22	71	MUST	COCA:2014:MAG	MAG	13	PopScience	vb	NA	NA	root	nec	ns	subjextn	cond	n	pres	pos	presvb	NA	n	act	dyn	GO	n	3s	y	y	n	maincl	NA	decl	pos	NA	n	n	n	str	ass	ass	dir	NA	NA	NA
" " Just a moment. " Carver came on. " Mr. Tobias. Tbis is a surprise. What can I do for you? "' Tou know about our layoffs. "' Tes I do . It's a sbame to see the company go down. '' '' I need to talk to you, Mr. Carver. Now. '' '' It's after five Mr. Tobias. I was just getting ready to leave. " " Tbere are otber lawyers, Mr. Carver. " Tbere was a pause, tben a sigh. " Okay, Mr. Tobias. Talk to	23	59	NEED TO	COCA:2015:FIC	FIC	13	LegalStudiesForum	vb	n	pres	root	nec	ns	subjextn	circ	n	pres	sim	presvb	NA	n	act	dyn	TALK	n	1s	y	y	n	maincl	NA	decl	pos	NA	n	n	n	str	dir	dir.areq	dir	NA	NA	NA
" " Northern Exposure, " " EZ Streets, " " Nothing Sacred " and " I'll Fly Away " - all minor miracles that beamed through TV's mediocrity and fought for life despite less than stellar ratings. To achieve that kind of creative distinction, a network has to be able to back a brilliant writer-producer with a voice and a vision, leave them aloneto bring their idea to the screen, and then continue to…	24	111	BE ABLE TO	COCA:1999:NEWS	NEWS	14	Denver	vb	NA	toinf	root	pos	ns	ab	subjint	n	pres	sim	presvb	NA	n	act	dyn	BACK	n	3s	y	y	y	maincl	NA	decl	pos	NA	n	n	n	noef	ass	ass	dir	NA	NA	NA
" " That is pure sophistry, " said Bokeerk. " If I carry it out there and it snoots something, diat will be my fault. " " Be diat as it may, " said die AI, '' if you are to restore teleportation to the entire galaxy, you may need to compromise your principles. '' Bokeerk was not sure she had heard correctly)%>. " The whole galaxy? I thought it was just this station that was n't working. " " The e…	25	309	MAY	COCA:2010:FIC	FIC	13	Bk:RejiggeringThingamajig	vb	NA	NA	ep	pos	ws	ep	disint	NA	pres	sim	presvb	NA	n	act	st	NEED TO	n	2s	y	n	n	maincl	NA	decl	pos	NA	n	n	n	str	ass	ass	dir	NA	NA	NA
" " The linebacker went for the knee as Neely was stepping out of bounds, " Paul said. " They showed it a dozen times on television. One of the announcers had the guts to call it a cheap shot. It was A &M,; what can I say? '' '' Must've hurt like hell. '' '' It did. '' '' He was carried)%>off in an ambulance and they wept in the streets of Messina. " " I'm sure that's true, " Silo said. " But it …	26	467	MUST	COCA:2004:FIC	FIC	13	Bk:Bleachers	vb	NA	NA	ep	nec	ws	ep	disint	NA	pres	ant	pfvbc	ant	n	act	st	HURT	n	3s	n	n	NA	maincl	NA	decl	pos	NA	n	n	n	noef	exp	exp	dir	NA	e	LIKE HELL
" " Well... " " And that's why he puts on the bat's clothes. " " Actually, they do n't go so far as to say that, " Sammy said. " But I guess it's there between the lines. '' '' So, we need to figure out what is the why. '' ''' What is the why ,' " Sammy agreed. " Flattop. " Joe looked up and saw a young man standing in front of them. He was short-waisted and plump, and his face, except for a pair…	27	231	NEED TO	COCA:2002:FIC	FIC	13	LitCavalcade	vb	n	pres	root	nec	ns	subjextn	disint	n	pres	sim	presvb	NA	n	act	dyn	FIGURE OUT	n	1p	y	y	n	maincl	NA	decl	pos	NA	n	n	n	noef	ass	ass	dir	NA	NA	NA
" " What are you doing in my yard? " " I heard about the bears, " Anson said. " Go away. " Anson stepped back into the alley. " You shot a bear with my pistol, '' he said. '' Good for you. '' '' I might use it again. '' Randy carried a few more of the broken slats to)%>his truck and tossed them into the bed. " I can finish this later, " he said. " I'll come back. " Anson looked toward the house. …	28	471	MIGHT	COCA:2013:FIC	FIC	13	GettysburgRev	vb	NA	NA	ep	pos	ws	ep	disint	NA	pres	sim	presvb	NA	n	act	dyn	USE	n	1s	y	y	n	maincl	NA	decl	pos	NA	n	n	n	noef	ass	ass	dir	NA	e	AGAIN
" # Eventually, the automakers plan to move toward so-called hybrid vehicles, which combine the features of a traditional internal combustion engine and an electric motor. GM plans to have a full-sized hybrid pickup on the road by 2004. # But boosting the fuel efficiency of an SUV or light-truck fleet need not be purely an engineering issue. # Ford plans to market new, smallerSUVs built on body f…	29	472	NEED TO	COCA:2001:NEWS	NEWS	14	Houston	neg.vb	NA	pres	root	nec	ws	gsn	circ	NA	pres	sim	presvb	NA	n	act	st	BE	n	3s	n	n	n	maincl	NA	decl	not	negprop	n	n	n	noef	ass	ass	dir	NA	ie	PURELY
" # The' indignants # The improbable inspiration of the movements is a 93-year-old French Nazi resistance hero, Stephane Hessel, who came out of retirement last year to write a bestseller titled " Get Indignant! " that laments the loss of ideals and idealism in Europe, arguing that young people should not accept a future predetermined to be bleak and constricted. What's unclear is)%>where the new…	30	84	SHOULD	COCA:2011:NEWS	NEWS	14	CSMonitor	neg.vb	NA	NA	root	nec	ns	subjextn	disint	n	pres	sim	presvb	NA	n	act	dyn	ACCEPT	n	3p	y	y	y	sub.nomcl	ARGUE	NA	not	negprop	n	n	n	noef	ass	ass	dir	NA	NA	NA
" # The viscount waved his hand again, this time his motion more impatient. " I told you, madam, it is irrelevant. While you have been locked away on the borderland, much has happened here at court. The King will die very soon. '' # '' You should not say anything of that nature. Only God knows such a thing. '')%>Justina snapped at him before thinking. # A deadly look entered Biddeford's eyes. " H…	31	189	SHOULD	COCA:2012:FIC	FIC	13	Bk:UnexpectedPleasures	neg.vb	NA	NA	root	nec	ns	subjextn	disint	n	pres	sim	presvb	NA	n	act	dyn	SAY	n	2s	y	y	n	maincl	NA	decl	not	negprop	n	n	n	str	exp	exp	indir	NA	NA	NA
" (see appendix A). # The limitations of text messaging as a reference platform also impacted the creation of the Searching criterion. For example, RUSA suggests that the librarian " Finds out what patrons have already tried, and encourages patrons to contribute ideas; '' 27 since many patrons may be billed per text message, this criterion was omitted from the rubric. Similar)%>minor customizatio…	32	89	MAY	COCA:2014:ACAD	ACAD	14	Ref&UserServQ	vb	NA	NA	root	pos	ws	gsp	circ	NA	pres	sim	presvb	NA	n	pas	dyn	BILL	n	3p	y	n	n	sub.advcl	SINCE	NA	pos	NA	n	n	n	noef	ass	ass	dir	NA	NA	NA
" // " He's in a coma. " // " He'll know I'm there. " // " What is it you want, Bella? An apology? " // " I want... mutual forgiveness. '' // '' You are fantasizing, '' John said somberly. // '' I have to try, '' she said. // She knows the words ring hollow. Persuading Henry's wife to let her see Henry will not be easy. Eunice does not forgive. // Isabella swings her feet to the floor, searching …	33	194	HAVE TO	COCA:2008:FIC	FIC	13	Bk:HarrietIsabella	vb	n	pres	root	nec	ns	subjextn	disint	n	pres	sim	presvb	NA	n	act	dyn	TRY	n	1s	y	y	n	maincl	NA	decl	pos	NA	n	n	n	noef	ass	ass	dir	NA	NA	NA
" A shimmer grew in the air next to Bokeerk. A nanoswarm, she realized. The swarm thickened, forming a sphere about the size of a human head. A smiley-face mouth opened, although it did not move as a whispery voice said, '' Follow you. '' '' It may come in handy at some point, '' said the AI. '' It would)%>make for some mighty fine target practice, " said the gun. The doors creaked as they slid o…	34	120	MAY	COCA:2010:FIC	FIC	13	Bk:RejiggeringThingamajig	vb	NA	NA	ep	pos	ws	ep	disint	NA	pres	sim	presvb	NA	n	act	st	COME IN	n	3s	n	n	n	maincl	NA	decl	pos	NA	n	n	n	noef	ass	ass	dir	NA	e	AT SOME POINT
" Aliss laughed. Below us, the paper from the window peeled back, and Caroline waved at us. Two of the three new robots stood in the kitchen watching her with their shiny silver faces. It was too far away for me to tell for sure, but I thought Caroline might be smiling. )%> ##4076009 The emperor of Earth did n't like to be wrong. Many of his acolytes had learned that the hard way, though this was…	35	259	MIGHT	COCA:2010:FIC	FIC	13	Bk:RobotsGirl	vb	NA	NA	ep	pos	ws	ep	disint	NA	pastsub	sim	presvb	NA	y	act	dyn	SMILE	n	3s	y	y	n	sub.nomcl	THINK	NA	pos	NA	n	n	n	noef	ass	ass	indir	NA	NA	NA
" almond, " and another called a " soy. " I've never seen a wild almond or a soy galloping about in its natural habitat, but cow milk is the best. I'd bet three of my four stomachs on it. Of course I'm biased, what else could I be? Bias makes the world go round, sometimes a little too fast)%>. But I digress. And maybe digression is n't really digression, maybe the shortest distance between two mi…	36	342	COULD	COCA:2015:FIC	FIC	13	Bk:HolyCow	subjinv	NA	NA	root	pos	ws	gsp	circ	NA	pres	sim	presvb	NA	n	act	st	BE	n	1s	y	n	n	maincl	NA	int	pos	NA	n	n	n	noef	exp	exp	indir	NA	NA	NA
" Americans have spent the better part of the 21st century cultivating anxieties about a stagnant middle class, insipid economic growth, an allegedly slowing pace of innovation and productivity, class inequality, and other maladies. Meanwhile , partly beyond their gaze, a dazzling technological revolution has been taking place that may guarantee a future of exhilarating progress. Maybe it's time …	37	73	MAY	COCA:2014:NEWS	NEWS	14	Denver	vb	NA	NA	ep	pos	ws	ep	disint	NA	pres	sim	presvb	NA	n	act	st	GUARANTEE	n	3s	n	n	n	sub.relcl	NA	NA	pos	NA	n	n	n	noef	ass	ass	dir	NA	NA	NA
" Amos says. # In July, some forces will begin to draw down. The pace of the reductions will depend on security conditions, but calls for a sharp drawdown have increased after the killing of al-Qaeda leader Osama bin Laden. Commanders are reluctant to discuss numbers but say the reductions should not be so deep to jeopardize gains. # '' There is definitely an emotional)%>attachment to the success…	38	250	SHOULD	COCA:2011:NEWS	NEWS	14	USAToday	neg.vb	NA	NA	root	nec	ws	gsn	circ	NA	pres	sim	presvb	NA	n	act	st	BE	n	3p	n	n	n	sub.nomcl	SAY	NA	not	negprop	n	n	n	noef	ass	ass	dir	NA	NA	NA
" and " visibility " of nonheterosexual sexualities, and increasingly of nonnormative genders as well, produce legible self-identification as their price of admission. As we gain visibility we are expected to identify ourselves, to make ourselves legible according to terms that continue to multiply--our acronym just keeps getting longer. Silence may, indeed, equal death, but now I am tempted to s…	39	447	MAY	COCA:2012:ACAD	ACAD	14	ArtJournal	NA	NA	NA	ep	pos	ws	ep	disint	NA	pres	sim	presvb	NA	n	act	st	EQUAL	n	3s	n	n	y	maincl	NA	decl	pos	NA	n	n	n	str	ass	ass	dir	NA	m	INDEED
" Antronette Yancey, a professor at UCLA's School of Public Health, sees the same phenomenon in her city. " Parents say they'd rather have a fat kid than a dead kid, " she says . But inner cities are only part of the problem. Despite the image we might have of the abundance and open spaces of the countryside, Americans living in isolated)%>rural communities also tend to have few places to walk an…	40	424	MIGHT	COCA:2008:MAG	MAG	13	Time	vb	NA	NA	ep	pos	ws	ep	disint	NA	pres	sim	presvb	NA	n	act	st	HAVE	n	1p	y	n	n	sub.relcl	NA	NA	pos	NA	n	n	n	noef	ass	ass	dir	NA	NA	NA
" As a person, I do n't know if I've met anyone more loyal. She's quiet and reserved if you do n't know her. If you know her, she's the opposite: outgoing and friendly and supportive. '' # At home with Hilary # Her on-screen antics might be attention-grabbing, but her off-screen life in Los Angeles is anything but, Swank)%>swears. # " One of my friends actually said,' You guys want to go to this …	41	149	MIGHT	COCA:2009:NEWS	NEWS	14	USAToday	vb	NA	NA	ep	pos	ws	ep	disint	NA	pres	sim	presvb	NA	n	act	st	BE	n	3p	n	n	n	maincl	NA	decl	pos	NA	n	n	n	str	ass	ass	dir	NA	NA	NA
" At time of such international tensions, golf is good way to bring about better understanding between our two countries. " # " Beating swords into nine irons, " I nodded eagerly. # Mr. Kim seemed perplexed by my biblical allusion. Stupid of me, really. # '' Tournament must be first-class. Famous golfers -- Tiger Woods. Major celebrities -- Clint Eastwood.)%>" # I conjured up a vision of Tiger an…	42	391	MUST	COCA:2003:MAG	MAG	13	Forbes	vb	NA	NA	root	nec	ws	gsn	disint	NA	pres	sim	presvb	NA	n	act	st	BE	n	3s	n	n	n	maincl	NA	decl	pos	NA	n	n	n	noef	ass	ass	dir	NA	NA	NA
" Come on up, lad! Do n't be shy! " l: ON FACT &; FICTION Fiction writers often prove coy about the origins of their stories. " Did that come from your life, " a reader asks, '' or did you make it up? '' The implication may be that borrowing from life is less impressive than using '' pure '' imagination.)%>But writers know this is a false dichotomy. Making fiction from your own life involves a co…	43	395	MAY	COCA:2010:FIC	FIC	13	Commonweal	vb	NA	NA	ep	pos	ws	ep	disint	NA	pres	sim	presvb	NA	n	act	st	BE	n	3s	n	n	n	maincl	NA	decl	pos	NA	n	n	n	noef	ass	ass	dir	NA	NA	NA
" Dinheiro nao e semente, " a 1941 samba by Felisberto Martins and Mutt: PREFORMATTED TABLE # This song clearly expresses the notion that money does not grow on trees, but rather is the fruit of labor , a reference buttressed by the Biblical myth of the expulsion from paradise when man needs to earn his bread '' through the sweat of his brow. '' Not even the possibility of borrowing from friends …	44	307	NEED TO	COCA:1999:ACAD	ACAD	14	LatAmPopScult	vb	n	pres	root	nec	ns	subjextn	circ	n	pres	sim	presvb	NA	n	act	dyn	EARN	n	3s	y	y	y	sub.advcl	WHEN	NA	pos	NA	n	n	n	noef	ass	ass	dir	NA	NA	NA
" disguised as friendly chatter, was castigated by many contemporary authors. 76 (Figure 15 shows an eighteenth-century representation of the same subject.) Critics who branded the painting indecent were clearly aware of these connotations. # The offense was aggravated by the details. One of the sheets on the floor can be identified as the first of a pair of lithographs after Eugene Gurard, origi…	45	5	CAN	COCA:2014:ACAD	ACAD	14	ArtBulletin	vb	NA	NA	root	pos	ws	gsp	circ	NA	pres	sim	presvb	NA	n	pas	dyn	IDENTIFY	n	3s	n	n	n	maincl	NA	decl	pos	NA	n	n	n	noef	ass	ass	dir	NA	NA	NA
" divorce. The effect of " no fault " divorce, however, has been to shift those desperate measures to the spouse opposing a divorce, he or she having been stripped of any other means of saving the marriage. (For example, the spouse seeking a divorce has always been able to say, '' If you refuse, I will make your life hell." The argument available to the defendant today is limited to pointing out …	46	189	BE ABLE TO	COCA:2003:MAG	MAG	13	NatlReview	vb	NA	prespf	root	pos	ws	gsp	circ	NA	pres	sim	presvb	NA	n	act	dyn	SAY	n	3s	y	y	y	maincl	NA	decl	pos	NA	n	n	n	noef	ass	ass	dir	NA	NA	FOR EXAMPLE+ALWAYS
" do n't know " and the instructor said, " The answer should be X. " # **27;70290;TOOLONG (S) # Adapted from Siegler's strategic intervention procedures (45), self-explanation was requested from each student . After feedback, the student was asked to explain the correct answer: '' Can you explain why the answer is X? '' If the student correctly explained the)%>reason for the answer, the instructo…	47	6	CAN	COCA:2014:ACAD	ACAD	14	LearningDisability	subjinv	NA	NA	root	pos	ns	ab	subjint	n	pres	sim	presvb	NA	n	act	dyn	EXPLAIN	n	2s	y	y	n	maincl	NA	int	pos	NA	n	n	n	noef	dir	dir.areq	indir	NA	NA	NA
" Do we really need a quart-size beverage for one person? " Young asks. " Many of these drinks contain as much as 500 calories. " Translation: if you love your caloric liquids, limit yourself to the smallest size available, once a day. When considering cocktails, women should also stick to one drink a day (e.g., a 5-ounce glass of wine)%>, 12 ounces of beer, a 1.5-ounce shot of liquor), and men s…	48	124	SHOULD	COCA:2012:MAG	MAG	13	VegTimes	adv	NA	NA	root	nec	ns	subjextn	cond	n	pres	sim	presvb	NA	n	act	st	STICK	n	3p	y	n	y	maincl	NA	decl	pos	NA	n	n	n	noef	ass	ass	dir	NA	m	ALSO
" FOX News Watch. " (COMMERCIAL-BREAK) BURNS: We got a lot of mail - a lot of mail - about coverage of the Cheney hunting accident. Here is a sample: Dan from San Diego, California : '' Cheney doesn't have to be accountable to the press. He only needs to be accountable to the American people. '' Jeff, from Jamestown, North Carolina: " Amazing how the media think the VP should n't have waited on t…	49	315	NEED TO	COCA:2006:SPOK	SPOK	14	Fox_Saturday	vb	n	pres	root	nec	ns	subjextn	disint	n	pres	sim	presvb	NA	n	act	st	BE	n	3s	y	n	n	maincl	NA	decl	n.adv	NA	n	n	n	noef	ass	ass	dir	NA	im	ONLY
" Good-bye, Jafar. You have a great spirit. Your parents would be proud of you. You'll be with me always " # She was wiping her wet cheeks with the backs of her hands as she turned away from the window. Kadmus would be coming soon, and he mustn't see that she'd been weeping. It would be a triumph, and)%>she would n't allow the atrocity he'd committed tonight to give him that victory. # Start the …	50	105	MUST	COCA:2014:FIC	FIC	13	Bk:LiveSeeTomorrow	neg.vb	NA	NA	root	nec	ns	subjextn	disint	n	pres	sim	presvb	NA	n	act	st	SEE	n	3s	y	n	n	maincl	NA	decl	notc	negprop	n	n	n	noef	exp	exp	dir	NA	NA	NA
" he said last December. # " It's obvious that an Army function or facility ought to be able to exist on an Air Force installation, " he said. " We're not going to homogenize the installations, but what we are going to do is rationalize where certain functions ought to best exist. '' # Except for saying all bases will be evaluated equally and that this BRAC will be free of political influence, de…	51	415	OUGHT TO	COCA:2003:NEWS	NEWS	14	Atlanta	adv	n	NA	root	nec	ws	gsn	circ	NA	pres	sim	presvb	NA	n	act	st	EXIST	n	3p	n	n	n	sub.advcl	WHERE	NA	pos	NA	n	n	n	noef	com	com	indir	NA	m	BEST
" He'd presented a convincing argument. But Drew has always known that he did n't have a choice. He worked for the government. In their final year of university. Drew listened most nights to Ralph 's low voice cajoling and stroking, the murmurs travelling through the walls. He couldn't believe the girls fell for it. But they did, every time.)%>With his fleshy mouth that glistened pink and healthy…	52	369	COULD	COCA:2013:FIC	FIC	13	SmallAxe	neg.vb	NA	NA	root	pos	ns	ab	subjint	n	past	sim	presvb	NA	n	act	st	BELIEVE	n	3s	y	n	n	maincl	NA	decl	notc	negmod	n	n	n	noef	ass	ass	dir	NA	NA	NA
" Holly, the walls have ears. " # " I do n't care if he can hear me, maybe he should be listening to me. Maybe you should listen. Something has to be done. '' # His father dropped his voice, changed the tone, so Jack Peter had to creep closer to the register. # '' It was just the one time , Hol. Just the once. I'll talk to him. We'll work on him not hitting, but I do n't want to have him all dope…	53	380	HAVE TO	COCA:2014:FIC	FIC	13	Bk:BoyWhoDrewMonsters	vb	n	pret	root	nec	ns	subjextn	circ	y	past	sim	presvb	NA	n	act	dyn	CREEP	n	3s	y	y	n	maincl	NA	decl	pos	NA	n	n	n	noef	ass	ass	dir	NA	NA	NA
" I am OK. I fell down on the ground. "). # By the end of January, Emily and Marisa transitioned to level 7 texts # (approximately end of first quarter in first grade ). Marisa had developed confidence in her ability to decode unknown words and was able to make attempts without Emily's confirmation. She also had learned to use othersources of information to confirm initial attempts of unknown wor…	54	21	BE ABLE TO	COCA:2013:ACAD	ACAD	14	ReadingTeacher	vb	NA	pret	root	pos	ns	ab	subjint	n	past	sim	presvb	NA	n	act	dyn	MAKE	n	3s	y	y	n	maincl	NA	decl	pos	NA	n	n	n	noef	ass	ass	dir	NA	NA	NA
" I do n't know if I can help you, " Colin said. " I'm not at all clear about who you are or where you're from or what you're talking about. All I do know is that to me a client is a client and I suppose I might consider some freelance work off the books. '' '' What books? Do you)%>mean repair manuals? " " No, I do n't use repair manuals. I use my intuition. I have n't consulted a manual since I …	55	140	MIGHT	COCA:2009:FIC	FIC	13	FantasySciFi	vb	NA	NA	ep	pos	ws	ep	disint	NA	pres	sim	presvb	NA	n	act	dyn	CONSIDER	n	1s	y	y	n	sub.nomcl	SUPPOSE	NA	pos	NA	n	n	n	noef	ass	ass	dir	NA	NA	NA
" I felt I pitched better today than I did in my last start, " said Westbrook. " Granted, not very good. " I did n't think of it as not getting the ground balls. I was making decent pitches. But I was putting myself into situations where I needed to make a pitch and I wasn't able to do it. '' I have to limit the walks. Walks are n't very good (in order) to be successful, unless you do put the bal…	56	326	NEED TO	COCA:2013:NEWS	NEWS	14	STLouis	vb	n	pret	root	nec	ns	subjextn	circ	n	past	sim	presvb	NA	n	act	dyn	MAKE	n	1s	y	y	n	sub.relcl	NA	NA	pos	NA	n	n	n	noef	ass	ass	dir	NA	NA	NA
" I insisted. # " I'm glad, " Marianne said sweetly and rubbed her stomach. " And I'm looking forward to having this baby and eating some of your famous lasagna. " # I smiled. '' The secret family recipe, '' I said furtively. '' You might get more than one. '' # '' Kate, can I speak with you)%>a moment? " # We turned around to see Gloria, the executive publisher of the entire company, and Mariann…	57	335	MIGHT	COCA:2012:FIC	FIC	13	Bk:JaneAustenMarriage	vb	NA	NA	ep	pos	ws	ep	disint	NA	pres	sim	presvb	NA	n	act	dyn	GET	n	2s	y	n	n	maincl	NA	decl	pos	NA	n	n	n	noef	ass	ass	dir	NA	NA	NA
" If there is consumer demand, if people like getting these calls, find it an efficient way to shop, they are free to get them, but those of us who do n't want it should say no SAWYER All right. Let's stop right there. What do you think ought to be done about these calls that you get at your home? We'll be talking about the solutions when we come back in a moment. Nightline/Roper poll, 1991. Perc…	58	425	OUGHT TO	COCA:1991:SPOK	SPOK	14	ABC_Nightline	vb	n	NA	root	nec	ws	gsn	disint	NA	pres	sim	presvb	NA	n	pas	dyn	DO	n	3s	y	n	n	sub.nomcl	THINK	NA	pos	NA	n	n	n	noef	dir	dir.ireq	dir	NA	NA	NA
" It's not the same thing, " Benton said. " It's complicated, but let's just say that there are electromagnetic fields all around us. The presence of a ghost can disturb the field . The EMF meter I have is a combination meter and thermometer, since ghosts can cause a sudden temperature drop in a room or a building. '' # '')%>Kinda like the PKE meter the Ghostbusters had, " Lawton said. # " A litt…	59	7	CAN	COCA:2015:FIC	FIC	13	Bk:BetweenLivingDead	vb	NA	NA	root	pos	ws	gsp	circ	NA	pres	sim	presvb	NA	n	act	dyn	CAUSE	n	3p	y	n	y	sub.advcl	SINCE	NA	pos	NA	n	n	n	noef	ass	ass	dir	NA	NA	NA
" Its policy is to urge clients to keep payments modest in order to reimburse a woman for inconvenience and discomfort. " So your own society, Professor Annas, disagrees with you. So you know, is it no price, or is it you're just -- don't think there ought to be a price like maybe $10,000, or $15,000 or $50,000? Is that your problem? ANNAS: It's not my society. I mean, I am a member of the Ethics…	60	310	OUGHT TO	COCA:1999:SPOK	SPOK	14	CNN_Crossfire	vb	n	NA	root	nec	ws	gsn	disint	NA	pres	sim	presvb	NA	n	act	st	BE	y	3s	n	n	n	sub.nomcl	THINK	NA	n.rais	NA	n	n	n	noef	dir	dir.ireq	dir	NA	NA	NA
" Jerry tried to reassure himself, but there was no sign of the security guard. He had to get out on his own. " Meteor Attack, " he muttered. In that virtual game, Jerry had been trapped underground after a meteor had collided with the earth. He'd had to crawl through the ventilator duct in order to reach safety. Using the flashlight , Jerry located the lab's ventilator duct high up in the wall. …	61	378	HAVE TO	COCA:1999:MAG	MAG	13	BoysLife	vb	n	pastpf	root	nec	ns	subjextn	cond	y	past	sim	presvb	NA	n	act	dyn	CRAWL THROUGH	n	3s	y	y	n	maincl	NA	decl	pos	NA	n	n	n	noef	ass	ass	dir	NA	NA	NA
" Judge Kavanaugh wrote. But he added that the arguments about a disparity that " discriminates against the national political parties in political and legislative debates " should be directed to the Supreme Court. Richard H. Pildes, a law professor at New York University, said the logic of the McCutcheon decision may cause the court to return to the question, adding that a larger role for)%>poli…	62	202	MAY	COCA:2014:NEWS	NEWS	14	NYTimes	vb	NA	NA	ep	pos	ws	ep	disint	NA	pastsub	sim	presvb	NA	n	act	dyn	CAUSE	n	3s	n	n	n	sub.nomcl	SAY	NA	pos	NA	n	n	n	noef	ass	ass	dir	NA	NA	NA
" Katie sniffed. Maddie brought Katie into the kitchen to call her mom. After a little while on the phone, Katie decided to go home. " Do n't worry, " Maddie told Katie. " I'm really glad that you came. '' '' I'm sorry that Katie had to leave, '' Maddie said to her mom. '' I know you are , " said Mom. " But that's the fourth slumber party secret: Let everybody do what makes them feel the most com…	63	366	HAVE TO	COCA:2009:FIC	FIC	13	JackJill	vb	n	pret	root	nec	ns	subjextn	circ	y	past	sim	presvb	NA	n	act	dyn	LEAVE	n	3s	y	y	n	sub.nomcl	BE SORRY	NA	pos	NA	n	n	n	noef	exp	exp	dir	NA	NA	NA
" Larkin faked a shiver. " You made it look creepy. " Seth shrugged. " Hey, I think we're done here. I'm hungry. Are you hungry? " He tumed to Charlotte . '' You must know, like, some pretty cool place around here we could eat, right? Barbecue or something? Or like soul food? '' He)%>did n't wait for an answer but tumed with Larkin and started back along the tracks. " Right, " Charlotte said, wat…	64	121	COULD	COCA:2015:FIC	FIC	13	FantasySciFi	vb	NA	NA	root	pos	ns	op	circ	n	pres	sim	presvb	NA	n	act	dyn	EAT	n	1p	y	y	n	sub.relcl	NA	NA	pos	NA	n	n	n	noef	dir	dir.areq	indir	NA	NA	NA
" Leahy said, citing the names of three Clinton appointees whose nominations died in the GOP-controlled Senate. # With Republicans gearing up to use the hearing to emphasize Estrada's immigrant success story, Democrats are expected to turn the session into an examination of his ideology and temperament. # But Democrats must proceed gingerly with Estrada to avoid the risk of offending Hispanic vot…	65	217	MUST	COCA:2002:NEWS	NEWS	14	WashPost	vb	NA	NA	root	nec	ns	subjextn	cond	n	pres	sim	presvb	NA	n	act	dyn	PROCEED	n	3p	y	y	y	maincl	NA	decl	pos	NA	n	n	n	noef	ass	ass	dir	NA	ie	GINGERLY
" Maybe carbon-14. " " Carbon-14? " " We use only stable isotopes for signatures. Carbon-14 decays. How old is this violin? " " It was made in 1714. " " So the wood 's over three hundred years old. '' '' Possibly much more, as Stradivari may have used aged wood. '' '' If I focus the scanner on an interior)%>piece of wood, I should get a sample mostly unaffected by any later modifications. " Denni…	66	72	MAY	COCA:2009:FIC	FIC	13	Analog	vb	NA	NA	ep	pos	ws	ep	disint	NA	pres	ant	pfvbnc	ant	n	act	dyn	USE	n	3s	y	y	n	sub.advcl	AS	NA	pos	NA	n	n	n	noef	ass	ass	dir	NA	NA	NA
" mission " of the community college is accepted as one that includes educating underprepared or learning disabled students, then faculty must recognize this facet of the " mission " and stop looking at community college students in the same light as they view traditional four-year college students. In addition, perhaps professors ought to welcome instruction concerning how best to teach these st…	67	180	OUGHT TO	COCA:1991:ACAD	ACAD	14	CommCollegeR	vb	n	NA	root	nec	ns	subjextn	cond	n	pres	sim	presvb	NA	n	act	dyn	WELCOME	n	3p	y	y	y	maincl	NA	decl	pos	NA	n	n	n	noef	ass	ass	dir	weak	initial	PERHAPS
" Oh, no, it's fine. " # Truly, it is. He looks so earnest, the doctor. He seems a kindly man, in his white coat; she hopes his gray hair is premature and that he can look forward to a long career. # '' Can you recall for me the last day that you felt completely well? '' The)%>doctor pauses. " There's no hurry. Take all the time you need. " # All the time she needs would be six decades, although …	68	8	CAN	COCA:2015:FIC	FIC	13	Bk:WildernessNovel	subjinv	NA	NA	root	pos	ns	ab	subjint	n	pres	sim	presvb	NA	n	act	st	RECALL	n	2s	y	n	n	maincl	NA	int	pos	NA	n	n	n	noef	dir	dir.areq	indir	NA	NA	NA
" or " Jesus forgave from the cross so why should n't you? " # " Or else it's presented as a panacea to all one's troubles--'You will feel so much better once you forgive, your relationship with the offender will improve, your marriage will heal, you will be able to be happy once again, all your pain will go away,' etc., " says Dolff. While those statements contain truths, she says, " It reduces …	69	112	BE ABLE TO	COCA:2014:MAG	MAG	13	USCatholic	vb	NA	fut	root	pos	ws	gsp	circ	NA	fut	sim	presvb	NA	n	act	st	BE	n	2s	y	n	n	maincl	NA	decl	pos	NA	n	n	n	noef	ass	ass	dir	NA	e	ONCE AGAIN
" points of control. " In publishing, O'Reilly believes this means controlling whatever will become the dominant device, the dominant software platform, and the largest library of content. For publishers to succeed in that world , he adds, they have to realize '' format '' is not what they should be preserving. '' People don't care about books or other packaging, '')%>he says. " They care about i…	70	7	SHOULD	COCA:2010:MAG	MAG	13	Newsweek	vb	NA	NA	root	nec	ns	subjextn	disint	n	pres	sim	presvb	NA	y	act	dyn	PRESERVE	n	3p	y	y	y	sub.nomcl	BE	NA	pos	NA	n	n	n	noef	ass	ass	dir	NA	NA	NA
" public " events. At a theoretical level the conceptual boundary between public and private, so long transparent, is now being challenged, disturbing the definition of categories that lie at the heart of much of our discipline (Comaroff 1987; Lugo and Maurer 2000). The study of babies ought to profit from such a theoretical shakeup. Can Babies Communicate? # Babies are - or at least appear - inc…	71	421	OUGHT TO	COCA:2000:ACAD	ACAD	14	AnthropolQ	vb	n	NA	root	nec	ws	gsn	disint	NA	pres	sim	presvb	NA	n	act	dyn	PROFIT	y	3s	n	n	n	maincl	NA	decl	pos	NA	n	n	n	noef	ass	ass	dir	NA	NA	NA
" Said they's done sick and tired of Sulphur Creek, said they's gon na break Billy Go loose and just drive on outta here. " # " Billy Go, huh? " # Hiram nodded . '' You allus treat me right, Mistah Armand, and I thought you ought to know, but I sure am ascared. '' # '' You ain't got nothin to fear, Hiram. " # " They said they'd whip up - " # " Hush now. That colored boy, Dixon, you seen him insid…	72	134	OUGHT TO	COCA:2003:FIC	FIC	13	FantasySciFi	vb	n	NA	root	nec	ns	subjextn	disint	n	pastsub	sim	presvb	NA	n	act	st	KNOW	n	2s	y	n	n	sub.nomcl	THINK	NA	pos	NA	n	n	n	noef	ass	ass	dir	NA	NA	NA
" says Gary Claxton of the Kaiser Family Foundation. That said, Obamacare will affect employer-provided coverage over time - although experts differ over how big the changes will be. Some examples: The mandate that employers with 50 or more full-time workers must provide health coverage (or pay a penalty) could prod some of them to shift to a labor force that has more part-time workers)%>, to avo…	73	436	COULD	COCA:2013:NEWS	NEWS	14	CSMonitor	vb	NA	NA	ep	pos	ws	ep	disint	NA	pres	sim	presvb	NA	n	act	dyn	PROD	n	3s	n	n	n	maincl	NA	decl	pos	NA	n	n	n	noef	ass	ass	dir	NA	NA	NA
" says that he finally feels accepted. " Now people celebrate me for having my own style. A lot of artists now are following my style and are trying to do the singing thing. I'm hearing it out there.I'm happy everything was able to come full circle and people are able to accept me for what I'm doing. I'm just being me." Photograph A doting father, Ja Rule spends time with his 20-month-old son, Je…	74	139	BE ABLE TO	COCA:2002:MAG	MAG	13	Jet	vb	NA	pres	root	pos	ws	gsp	circ	NA	pres	sim	presvb	NA	n	act	st	ACCEPT	n	3p	y	n	y	sub.nomcl	BE HAPPY	NA	pos	NA	n	n	n	noef	exp	exp	dir	NA	NA	NA
" Sept. 19 news story. # As a woman and a rape survivor, I have a hard time trusting Ken Buck's about-face on Amendment 62. Am I to believe that the man who, as a district attorney, refused to prosecute a rape case because he believed that the victim may have had '' buyer's remorse '' is incapable of understanding the possible consequences of)%>giving the status of " person " to a unified egg and…	75	11	MAY	COCA:2010:NEWS	NEWS	14	Denver	vb	NA	NA	ep	pos	ws	ep	disint	NA	pastsub	ant	pfvbnc	ant	n	act	st	HAVE	n	3s	y	n	n	sub.nomcl	BELIEVE	NA	pos	NA	n	n	n	noef	exp	exp	indir	NA	NA	NA
" She has a son almost your age. Mothering comes naturally to her. " " Have you learned anything more about the lucifish? " said Paul, trying mightily to change the subject. " Only a few facts of any consequence. But thanks to your insight, we're now able to connect the dots. '' '' My insight? '' '' Brilliant, ifI may say so. " Neville furrowed his brow. " How did you come by it? " " It? " " When…	76	145	BE ABLE TO	COCA:2005:FIC	FIC	13	Analog	vb	NA	pres	root	pos	ns	op	circ	n	pres	sim	presvb	NA	n	act	dyn	CONNECT	n	1p	y	y	n	maincl	NA	decl	pos	NA	n	n	n	noef	ass	ass	dir	NA	m	NOW
" she says in a tone that says the exact opposite. " As for views, " she continues, gesturing toward the now- ­ dark ocean and the sky that's starting to bloom with stars, " you're welcome to come back anytime and share mine. '' # '' I might take you up on that, '' I admit. '' I'd love to)%>bring a decent camera back here and take a shot or two. " 2078 A DEATH IN VALENCIA (	77	464	MIGHT	COCA:2012:FIC	FIC	13	Bk:ReleaseMeNovel	vb	NA	NA	ep	pos	ws	ep	disint	NA	pres	sim	presvb	NA	n	act	dyn	TAKE UP	n	1s	y	y	n	maincl	NA	decl	pos	NA	n	n	n	noef	com	com	dir	NA	NA	NA
" she says, " were brought up on Southern Baptist and Church of Christ " music. The kids always make their mom's gifts. # Not every Gore tradition is cherished. " No matter how many gifts (we have) for everybody, on Christmas Eve (Al) still has to say,' Well, I'm going to get in the car and drive down to Nashville and do some shopping,' " she laughs. " And I'm saying " You do n't need to.... We h…	78	305	HAVE TO	COCA:1993:NEWS	NEWS	14	USAToday	vb	n	pres	root	nec	ns	subjextn	circ	n	pres	sim	presvb	NA	n	act	dyn	SAY	n	3s	y	y	n	maincl	NA	decl	pos	NA	y	n	n	noef	ass	ass	dir	NA	im	STILL
" Stories come from experience, " Swallow answered, " and experience comes from life. For me, it is my life in this city. There may be spirits able to make up stories while living in the North Wind's palace, but I can not. In addition, I need to listen to more stories in the market here. If I don't hear what other storytellers are saying, my own invention will dry up. " " Ah, " said the minister,…	79	28	NEED TO	COCA:2015:FIC	FIC	13	FantasySciFi	vb	n	pres	root	nec	ns	subjextn	cond	n	pres	sim	presvb	NA	n	act	dyn	LISTEN	n	1s	y	y	n	maincl	NA	decl	pos	NA	n	n	n	noef	ass	ass	dir	NA	NA	IN ADDITION + HERE
" The Army Corps of Engineers treats the river differently north of downtown and south of downtown because the city of Long Beach has not asserted itself, " said Lewis MacAdams, the founder of the advocacy group Friends of the L.A. River. '' We have not done nearly as much as we should have done in Long Beach, and we're trying to change that. '')%>The city has made some strides. In 2007, it relea…	80	443	SHOULD	COCA:2014:NEWS	NEWS	14	OrangeCR	vb	NA	NA	root	nec	ns	subjextn	circ	n	past	sim	pfvbnc	past	n	act	dyn	DO	n	1p	y	y	n	sub.compcl	NA	NA	pos	NA	n	y	n	noef	ass	ass	dir	NA	NA	NA
" The core goal is to stop the downward trend in our ratings, " ABC Entertainment President Susan Lyne told reporters today at a news conference held at the ungodly hour of 8:30 a.m., before the network's '' upfront '' presentation of its new fall schedule to advertisers. # '' We need to stabilize and move the needle a little upwards. Nobody is expecting us to jump into first place next year, " a…	81	188	NEED TO	COCA:2002:NEWS	NEWS	14	WashPost	vb	n	pres	root	nec	ns	subjextn	disint	n	pres	sim	presvb	NA	n	act	dyn	STABILIZE	n	1p	y	y	n	maincl	NA	decl	pos	NA	n	n	n	noef	ass	ass	dir	NA	NA	NA
" the thing " I mean this whole mess that we're in. When I vote, I take it very seriously. And the deciding factor for me is which person, when they're in office, will cause the least amount of suffering on the planet? And I know there might be a subtle distinction. But I don't think there has ever been --)%>I'm sure there has been, but in modern times, this is a pretty stark choice that we get t…	82	75	MIGHT	COCA:2012:SPOK	SPOK	14	CNN	vb	NA	NA	ep	pos	ws	ep	disint	NA	pres	sim	presvb	NA	n	act	st	BE	y	3s	n	n	n	sub.nomcl	KNOW	NA	pos	NA	n	n	n	str	ass	ass	dir	NA	NA	NA
" Two and a Half Men. " Winning. But after all that craziness, here, now, this is what he's saying. All right. Take a look. CHARLIE-SHEEN# I should've been a little bit more, a little more humble, a little more regretful. I shouldn't have attacked them like I did and I probably should've begged for my)%>job back. You know what? Beg is a color I do n't wear well. I probably should've requested my …	83	182	SHOULD	COCA:2015:SPOK	SPOK	14	ABC	neg.vb	NA	NA	root	nec	ns	subjextn	disint	y	past	sim	pfvbnc	past	n	act	dyn	ATTACK	n	1s	y	y	n	maincl	NA	decl	notc	negprop	n	y	n	noef	exp	exp	dir	NA	NA	NA
" UNIDENTIFIED-FEMAL: All fingers have been pointed at her. UNIDENTIFIED-FEMAL: " I want a chance to be heard, dammit. " UNIDENTIFIED-MALE: Elisa, do you have anything to say? EMILY-DIETRICH-ZA: (INAUDIBLE ) happened to her! UNIDENTIFIED-FEMAL: '' But its not like I am not able to defend my freaking self. '' UNIDENTIFIED-MALE: Intense pressure on stepmom. UNIDENTIFIED-FEMAL:" Maybe I should just …	84	1	BE ABLE TO	COCA:2010:SPOK	SPOK	14	CNN_Grace	vb	NA	pres	root	pos	ns	ab	subjint	n	pres	sim	presvb	NA	n	act	dyn	DEFEND	n	1s	y	y	n	sub.advcl	LIKE	NA	not	negmod	n	n	n	noef	exp	exp	dir	NA	NA	NA
" What's fundamentally changed is our ability to look at materials in nature and say, with a straight face, that we can potentially make them with biotech, " says Dan Widmaier, Bolt Threads's chief executive officer. # That could benefit fabric manufacturers, but more importantly, it could benefit the environment. Most existing materials have a significant downside: Cotton farming typically)%>use…	85	153	COULD	COCA:2015:MAG	MAG	13	PopScience	vb	NA	NA	ep	pos	ws	ep	disint	NA	pres	sim	presvb	NA	n	act	st	BENEFIT	n	3s	n	n	n	maincl	NA	decl	pos	NA	n	n	n	noef	ass	ass	dir	NA	initial	MORE IMPORTANTLY
" Where are we? " Khorii asked. // " Akasa's wardrobe. That's where I found this, " Ariin said, holding up her wrist to show off the crono, which dangled loosely on her small arm. '' No more questions now. It's complicated. I need to get us back to an earlier time, before we were born. '' // " This is before I was born? " Khorii asked. // Continues...	86	183	NEED TO	COCA:2008:FIC	FIC	13	Bk:ThirdWatch	vb	n	pres	root	nec	ns	subjextn	circ	n	pres	sim	presvb	NA	n	act	dyn	GET BACK	n	1s	y	y	n	maincl	NA	decl	pos	NA	n	n	n	noef	ass	ass	dir	NA	NA	NA
" Yakob asks. " Sad because your cutie is discussing the future of her marriage? " " She is a cutie, " Jeannie says. " Where did you find her, Cecci, in a boutique ? '' I'm not quite listening because I've shifted to the questions I might ask Marcuse. There's much to discuss, but he was right about commercial)%>journalism. I will have to tone it down for the readers of Remoulade. I want to ask ab…	87	397	MIGHT	COCA:2014:FIC	FIC	13	PennLitJournal	vb	NA	NA	ep	pos	ws	ep	disint	NA	pres	sim	presvb	NA	n	act	dyn	ASK	n	1s	y	y	n	sub.relcl	NA	NA	pos	NA	n	n	n	noef	ass	ass	dir	NA	NA	NA
" Yet you are still alive. " " Temporarily. " Natasha tried to stifle her sobs. " As are we all, " Sister Ida reminded her, using the silk hem of Helena's slip to dry Natasha's tears. '' And in the time you have left, you must separate what is you and what is Helena, and celebrate what is you.)%>For there is much to celebrate. You are brave, and loyal, and honest, and loving. " With each attribut…	88	19	MUST	COCA:2003:FIC	FIC	13	FantasySciFi	vb	NA	NA	root	nec	ns	subjextn	disint	n	pres	sim	presvb	NA	n	act	dyn	SEPARATE	n	2s	y	y	n	maincl	NA	decl	pos	NA	n	n	n	noef	dir	dir.sug	dir	NA	NA	NA
# " Andy, Ricky's having fun. " # " You do n't get to the majors by having fun, " I say. # " Majors? " Laurie says, her voice both incredulous and disapproving. '' Is that your plan? '' # '' Why not? I could have made it to the majors myself, if I had the breaks, and)%>the dedication, and the ability. Why ca n't Ricky make it? " # " Well, for one thing, maybe he is n't good enough. " # " That's b…	90	294	COULD	COCA:2015:FIC	FIC	13	Bk:WhoLetDogOut?	vb	NA	NA	root	pos	ns	op	circ	n	past	sim	pfvbnc	count	n	act	dyn	MAKE IT	n	1s	y	y	n	maincl	NA	decl	pos	NA	n	y	n	noef	ass	ass	dir	NA	NA	NA
# " Dick, " she interrupted, patting his swollen knee. " You're going to make yourself sick. " # He closed his eyes, and the sobs let up, at least for a moment . She was alarmed by how bad he looked, didn't know how he could put himself in front of another crowd an hour from now. # '' Dick)%>, " she whispered, taking his hand. # He was looking at her now, wanting to tell her that he loved her. Sh…	91	222	COULD	COCA:2012:ACAD	ACAD	14	AmerScholar	vb	NA	NA	root	pos	ns	ab	subjint	n	pastsub	sim	presvb	NA	n	act	dyn	PUT	n	3s	y	y	n	sub.nomcl	KNOW	NA	pos	NA	n	n	n	noef	ass	ass	dir	NA	NA	NA
# " Oh that's all right, " she said. # " I'll be back. " # " Do n't bother. " # She was looking for the other girl and Rubito. # " Come on, '' Salas took the uncle by the arm. # '' I ought to get Rubito. '' # '' Leave him alone. He'll come back to the cafe. " # " What's the matter? " # " There's plenty of trouble. " # " On account of that business? " # " Yes. " # " So,	92	332	OUGHT TO	COCA:1990:FIC	FIC	13	HemingwayRev	vb	n	NA	root	nec	ns	subjextn	circ	n	pres	sim	presvb	NA	n	act	dyn	GET	n	1s	y	y	n	maincl	NA	decl	pos	NA	n	n	n	noef	ass	ass	dir	NA	NA	NA
# ##2041758 You can install a life raft on the bow in a couple of hours. BOAT OWNERS MAY TAKE THE PRECAUTION OF HAVING A LIFE RAFT aboard, but often they're not able to get to it and launch it when it's needed. Just as importantas owning a life raft and having it serviced at the intervals recommended by the manufacturer is keeping it where it can be quickly accessed in an emergency. The case for …	93	406	BE ABLE TO	COCA:2007:MAG	MAG	13	MotorBoating	vb	NA	pres	root	pos	ws	gsp	circ	NA	pres	sim	presvb	NA	n	act	dyn	GET TO	n	3p	y	y	y	maincl	NA	decl	notc	negmod	y	n	n	noef	ass	ass	dir	NA	initial	OFTEN
# * Lyme disease has an average incubation period of 15 days from bite to symptoms. # * TBE has an average incubation period 7-10 days in the range 2-28 days.10,11 # * Lyme disease and TBE may occur at any time of year.12,13 # PREVENTION # Vaccine is available against TBE, and should be recommended for travellers intending to visit areas where TBE is endemic (Table 1)%>). # Adult and paediatric v…	94	344	SHOULD	COCA:2014:ACAD	ACAD	14	PracticeNurse	vb	NA	NA	root	nec	ws	gsn	circ	NA	pres	sim	presvb	NA	n	pas	dyn	RECOMMEND	n	3s	n	n	n	maincl	NA	decl	pos	NA	n	n	n	noef	ass	ass	dir	NA	NA	NA
# 1 A big aid package # With Congress committed to finding another $1.5 trillion in deficit reduction over the next 10 years, lawmakers are in no mood to support a big aid package for Libya - nor is the Obama administration likely to request it. # Congressional leaders say an oil-producing state ought to be able to meet its own needs, especially with some $110 billion in frozen assets worldwide e…	95	354	OUGHT TO	COCA:2011:NEWS	NEWS	14	CSMonitor	vb	n	NA	root	nec	ns	subjextn	disint	n	pres	sim	presvb	NA	n	act	st	BE ABLE TO	n	3s	y	n	n	sub.nomcl	SAY	NA	pos	NA	n	n	n	noef	ass	ass	dir	NA	NA	NA
# 3. Rookie daze # Free safety Sean Taylor, the man the Redskins drafted fifth overall, passing on wide receiver Roy Williams, is playing like a typical rookie. He will bite on double moves and ought to be mighty susceptible to play-action fakes if Jones can get rolling. Quinn ought to be able to get the ball downfield because this defense needs a bye week in a bad way. # Ca n't give the Bears an…	96	350	OUGHT TO	COCA:2004:NEWS	NEWS	14	Chicago	vb	n	NA	root	nec	ns	subjextn	circ	n	pres	sim	presvb	NA	n	act	st	BE ABLE TO	n	3s	y	n	n	maincl	NA	decl	pos	NA	n	n	n	noef	ass	ass	dir	NA	NA	NA
# All I have is my gut -- what I find funny or important. Over the years I have been rocked by certain comedic minds. As a kid I adored the Marx brothers. I loved the way they pointed out hypocrisy and attacked it, sometimes both verbally and physically. I must have had a lot of anger as a kid because whenever Groucho told off some)%>rich asshole or snobby moron, I would be ecstatic. I think I fo…	97	388	MUST	COCA:2013:MAG	MAG	13	NewStatesman	vb	NA	NA	ep	nec	ws	ep	disint	NA	pres	ant	pfvbnc	ant	n	act	st	HAVE	n	1s	y	n	n	maincl	NA	decl	pos	NA	n	n	n	noef	ass	ass	dir	NA	NA	NA
# And now here she wascelebrated, adored, at the start of a brilliant career. And here he was, watching and waiting. To see all that radiant promise fulfilled. To comfort himself with the knowledge that he'd done the right thing. And for one more reason that he could not, dared not, put into words yet. # One way or another)%>, tonight would tell the tale. # The house lights dimmed and the orchest…	98	210	COULD	COCA:2013:FIC	FIC	13	Bk:SongAtTwilight	neg.vb	NA	NA	root	pos	ns	ab	subjint	n	past	sim	presvb	NA	n	act	dyn	PUT INTO	n	3s	y	y	n	sub.relcl	NA	NA	not	negmod	n	n	n	noef	ass	ass	dir	NA	NA	NA
# Another important conceptual point is that there is a vital interaction between the role of the patient and the provider in the process and state of health care empowerment. There is a wide range of factors that influence provider behavior in medical encounters. 62 To move toward greater health care empowerment the provider must acknowledge, foster, and respect the patient's autonomy and value …	99	323	MUST	COCA:2011:ACAD	ACAD	14	AmJPubHealth	vb	NA	NA	root	nec	ns	subjextn	cond	n	pres	sim	presvb	NA	n	act	st	ACKNOWLEDGE	n	3s	y	n	y	maincl	NA	decl	pos	NA	n	n	n	noef	ass	ass	dir	NA	NA	NA
# ANSWER: Andrews McMeel # Universal # ASK THE FOOL # What is " dollar-cost averaging "? # -- T.W., Statesboro, Ga. # It's a practice where you build a position in an investment over time by plunking in a certain dollar amount regularly. For instance, you might purchase $300 worth of stock in Scruffy's Chicken Shack (ticker: BUKBUK))%>every three months. You'd do this regardless of the stock pric…	100	243	MIGHT	COCA:2007:NEWS	NEWS	14	Chicago	vb	NA	NA	root	pos	ws	gsp	circ	NA	pres	sim	presvb	NA	n	act	dyn	PURCHASE	n	2s	y	y	y	maincl	NA	decl	pos	NA	n	n	n	noef	ass	ass	dir	NA	initial	FOR INSTANCE
# Benefits of Electronic Medical Records and Genomic Data Bases # The use of genomic data and EMRs, along with larger aggregate health information data bases,' big data,' and technologies, are transforming patient care . More extensive use of EMRs can avert needless deaths from preventable medical errors which can be traced back to poor records regarding patient prescription and over-the-counter …	101	9	CAN	COCA:2015:ACAD	ACAD	14	JIssuesNursing	vb	NA	NA	root	pos	ws	gsp	circ	NA	pres	sim	presvb	NA	n	pas	st	TRACE BACK	n	3p	n	n	n	sub.relcl	NA	NA	pos	NA	n	n	n	noef	ass	ass	dir	NA	NA	NA
# DENHAM is swigging from a HIP FLASK. HERB and PRESTON are gathered # gloomily around a TABLE, while DENHAM strides around the ROOM, # swigging and talking in a animated fashion. The STORM BATTERS and # CRASHES outside. # # DENHAM # # We got away. We got ta be grateful for # that gentlemen. # # PRESTON # # What about Mike? He did n't get away - # he's still there! # # DENHAM # # (sharply) # Mike…	102	507	HAVE TO	COCA:2006:FIC	FIC	13	Mov:King Kong	vb	n	pres	root	nec	ns	subjintn	NA	n	pres	sim	presvb	NA	n	act	st	BE	n	2p	y	n	n	maincl	NA	decl	pos	NA	n	n	n	noef	ass	ass	dir	NA	NA	NA
# Editor -- Why should the San Francisco taxpayers pay $ 29 million to rebuild Steinhart Aquarium? It's a prison for captive dolphins, who swim back and forth aimlessly, bored out of their minds. # Steinhart has received so many complaints about their treatment of the dolphins that they've had to post a notice trying to assure the public that the dolphins were born in captivity and that everythin…	103	446	HAVE TO	COCA:1995:NEWS	NEWS	14	SanFranChron	vb	n	prespf	root	nec	ns	subjextn	circ	y	pres	sim	presvb	NA	n	act	dyn	POST	n	3p	y	y	n	sub.advcl	SO MANY NP THAT	NA	pos	NA	n	n	n	noef	ass	ass	dir	NA	NA	NA
# For genealogists and family historians, the 1940 census release is the most important disclosure of ancestral secrets in a decade and could shake the branches of many family trees. Scholars expect the records to help draw a more pointillistic portrait of a transformative decade in American life. # Researchers might be able to follow the movement of refugees from war-torn Europe in the latter ha…	104	274	BE ABLE TO	COCA:2012:NEWS	NEWS	14	AssocPress	vb	NA	inf	root	pos	ns	op	circ	n	pres	sim	presvb	NA	n	act	dyn	FOLLOW	n	3p	y	y	y	maincl	NA	decl	pos	NA	n	n	n	noef	ass	ass	dir	NA	NA	NA
# GENERAL PRINCIPLES # Healthcare assistants (HCAs) are trained in a particular role and are accountable for their practice, however, they do not have a professional qualification nor are they registered or regulated by a professional body such as the Nursing and Midwifery Council (NMC). Hence all tasks should be delegated by a registered member of the clinical team who must ensure the principles…	105	113	SHOULD	COCA:2014:ACAD	ACAD	14	PracticeNurse	vb	NA	NA	root	nec	ws	gsn	rul	NA	pres	sim	presvb	NA	n	pas	dyn	DELEGATE	n	3p	n	n	n	maincl	NA	decl	pos	NA	n	n	n	noef	ass	ass	dir	NA	NA	NA
# HERNDON SENIOR CENTER CONCERT, by Just Friends, a five-piece combo playing American popular music from the 1920s through the 1960s. 1 p.m., Herndon Senior Center, 873 Grace St. Free. 703-464-6200. # CHAIR VOLLEYBALL FOR SENIORS, a game played with a beach ball while seated. Participants must be able to lift their arms. 1:45-2:45 p.m. Fridays, through Sept. 25, ViennaCommunity Center, 120 Cherry…	106	251	BE ABLE TO	COCA:2009:NEWS	NEWS	14	WashPost	vb	NA	inf	root	pos	ns	ab	subjint	n	pres	sim	presvb	NA	n	act	dyn	LIFT	n	3p	y	y	y	maincl	NA	decl	pos	NA	n	n	n	noef	ass	ass	dir	NA	NA	NA
# I did n't sit. " How you plan on getting me out ofhere? " I jutted my jaw toward the window. Since shesure was n't deaf, she could hear those shouts fromthe darkened streets. Men was cussing a whole lotmore than she'd just cussed me, and I could savvythat Felipe Hernandez wanted me brung backdead, and he didn't care what they)%>did to the galwho had sprung me loose, either. # " I got you this f…	107	366	COULD	COCA:2014:FIC	FIC	13	Bk:ValleyFire	vb	NA	NA	root	pos	ns	ab	subjint	n	past	sim	presvb	NA	n	act	st	SAVVY	n	1s	y	n	n	maincl	NA	decl	pos	NA	n	n	n	noef	ass	ass	dir	NA	NA	NA
# I nodded as he pressed the cloth around my face. After a few seconds, he removed it, rolled up his shirtsleeves, and covered my face with lather. " Hold still, signore. " I relaxed as the rhythmic scraping of the razor plied my skin. '' You may remember, I used to work as valet to Baron Gabler. My fiance,)%>Marianne, is lady's maid to the baroness. When I decided to open the shop, Miss Hahn was…	108	59	MAY	COCA:2015:FIC	FIC	13	Bk:FigaroMurders	vb	NA	NA	ep	pos	ws	ep	disint	NA	pres	sim	presvb	NA	n	act	st	REMEMBER	n	2s	y	n	n	maincl	NA	decl	pos	NA	n	n	n	noef	ass	ass	dir	NA	NA	NA
# I took a cookie--Oreo for me--and screwed off the top. # He said, " You spent several nights of the last few weeks before your finals helping three other officers prepare for the test. As a result two of them did better and you didn't do as well as you should have. '' # I ate the top. I like it in layers.)%>Cookie, cream, cookie. # " So what? " # " Just noting it. You received early promotion t…	109	402	SHOULD	COCA:2009:FIC	FIC	13	Bk:PatientZero	vb	NA	NA	root	nec	ns	subjextn	circ	n	past	sim	pfvbnc	count	n	act	dyn	DO	n	2s	y	y	n	sub.compcl	NA	NA	pos	NA	n	y	n	noef	exp	exp	indir	NA	NA	NA
# Improving and monitoring the homogeneity of the Chinese surveillance and health care system are challenging, yet vital, tasks to improve the monitoring of future pandemics. The effects of other interventions also need to be assessed, for example, strict case isolation, contact tracing, and medical observation, which might have helped delay the spread at early containment stage of the pandemic. …	110	257	MIGHT	COCA:2012:ACAD	ACAD	14	EmergingInfectious	vb	NA	NA	ep	pos	ws	ep	disint	NA	pres	ant	pfvbnc	ant	n	act	dyn	HELP	n	3p	n	n	n	sub.relcl	NA	NA	pos	NA	n	n	n	noef	ass	ass	dir	NA	NA	NA
# It's also far from clear whether the Fast Flip experiment will prove to be a knockout success like Gmail, or another in the line of Google flubs like Print Ads, a short-lived service selling ads for paper and ink publications. # The upside for readers is that they don't have to click through to view more than a snippet of an article. The beauty for the roughly three dozen major publishers partn…	111	125	HAVE TO	COCA:2009:NEWS	NEWS	14	SanFranChron	vb	y	pres	root	nec	ns	subjextn	circ	n	pres	sim	presvb	NA	n	act	dyn	CLICK THROUGH	n	3p	y	y	y	sub.nomcl	BE	NA	notc	negmod	n	n	n	noef	ass	ass	dir	NA	NA	NA
# It's okay. Jack, Arnold, Gary and Leethey're the real Hall of Famers. Mark O'Meara and David Graham, they played Hall of Fametype golf in their era, but they're not in the same class as Jack Nicklaus. People said, '' Hey, Freddie Couples shouldn't be in the Hall of Fame. '' But he was Hall of Fame)%>worthy in his era. I held my own in my era for a decade. I earned the right to say that I was on…	112	396	SHOULD	COCA:2015:MAG	MAG	13	GolfMag	neg.vb	NA	NA	root	nec	ws	gsn	disint	NA	pres	sim	presvb	NA	n	act	st	BE	n	3s	y	n	n	maincl	NA	decl	notc	negprop	n	n	n	noef	exp	exp	dir	NA	NA	NA
# Later that day, she calls her family and friends and tells them her news. Without exception, she can hear them pause as they work out the dates of Ben's death and when the baby is due. Their voices seem strained, as if they're not sure whether they should be happy or sad for her. # In January, Marie meets )%>with the school principal, Mr. Sampson, to discuss her maternity leave. The baby is due…	113	476	SHOULD	COCA:2010:FIC	FIC	13	GoodHousekeeping	vb	NA	NA	root	nec	ns	subjextn	circ	n	pres	sim	presvb	NA	n	act	st	BE	n	3p	y	n	n	sub.nomcl	BE SURE	NA	pos	NA	n	n	n	noef	ass	ass	dir	NA	NA	NA
# No other component means as much to Tesla's future. In order to make good on Musk's pledge to roll out an affordable version of the $70,000 sedan within a few years, Tesla must shave thousands of dollars off its battery costs without seriously sacrificing range. That, however, may again depend on massive subsidies-in this case funding to battery researchers and manufacturers by the)%>government…	114	464	MAY	COCA:2013:MAG	MAG	13	MotherJones	adv	NA	NA	ep	pos	ws	ep	disint	NA	pres	sim	presvb	NA	n	act	st	DEPEND	n	3s	n	n	n	maincl	NA	decl	pos	NA	n	n	n	noef	ass	ass	dir	NA	NA	HOWEVER+AGAIN
# Once a spy acquires his information, he has to protect it. James Bond has his Q, and Qs throughout history worked hard to support their agents. (The " Q " stands for " quartermaster . '') In World War II, infiltrators and downed pilots had to be able to find their way behind enemy lines. Compasses were hidden in cufflinks, pencilclips, and buttons. Maps were printed on rice paper so they would …	115	68	BE ABLE TO	COCA:2003:ACAD	ACAD	14	MechanicalEng	vb	NA	toinf	root	pos	ns	ab	subjint	n	past	sim	presvb	NA	n	act	dyn	FIND	n	3p	y	y	y	maincl	NA	NA	pos	NA	n	n	n	noef	ass	ass	dir	NA	NA	NA
# OTHER EFFICIENT THINGS: # POD HOTELS # CACTI # SPORKS # DRIVE-THROUGHS # 10333 Upgrade # GEAR TOOLS GADGETS # WIN THIS! # Items worth a total of $1970 in this section could be yours for free! Look for the WIN THIS! flag, and see)%>p. 50 for info on how to enter the sweepstakes. # Take our word for it, PopMech readers are a picky lot. And that makes you nearly impossible to shop for. Well, we've…	116	261	COULD	COCA:2013:MAG	MAG	13	PopMech	vb	NA	NA	ep	pos	ws	ep	disint	NA	pres	sim	presvb	NA	n	act	st	BE	n	3p	n	n	n	maincl	NA	excl	pos	NA	n	n	n	noef	exp	exp	dir	NA	e	FOR FREE
# PAUL J. LIM # Assistant managing editor, MONEY # PANELISTS # CHRISTINE BENZ # Director of personal finance, Morningstar # LUCIANO SIRACUSANO # Chief investment strategist, WisdomTree Investments # MARK FREEMAN # Chief investment officer, Westwood Holdings Group # Paul J. Lim: Why is dividend growthfocusing on companies that can increase their payouts year in and year outso important? # Luciano …	117	10	CAN	COCA:2015:MAG	MAG	13	Money	vb	NA	NA	root	pos	ns	op	circ	n	pres	sim	presvb	NA	n	act	dyn	INCREASE	n	3p	y	y	n	sub.relcl	NA	NA	pos	NA	n	n	n	noef	dir	dir.ireq	dir	NA	NA	NA
# Pause and Ponder # * What are some key instructional features of supplemental reading instruction for young English learners? # * With all the responsibilities that classroom teachers have, how can they make time for one-on-one instruction with selected students? # * Are there ways that classroom teachers and literacy specialists/coaches can increase communication around specific students' inst…	118	11	CAN	COCA:2013:ACAD	ACAD	14	ReadingTeacher	vb	NA	NA	root	pos	ns	op	circ	n	pres	sim	presvb	NA	n	act	dyn	INCREASE	n	3p	y	y	y	sub.relcl	NA	NA	pos	NA	n	n	n	noef	dir	dir.ireq	dir	NA	NA	NA
# R: At a good sushi bar in Japan, they would run it over a flame. They will do it until they crisp it, so when you get it, it has that really crisp sheet of seaweed, the warmth laid around the soft rice. # P: They must have, for many years, eaten it raw. They may have been eating)%>seaweed in other dishes, too. It's in soup. # R: So we ca n't metabolize it? # P: Nope. We get nothing from it exce…	119	117	MUST	COCA:2013:MAG	MAG	13	Smithsonian	vb	NA	NA	ep	nec	ws	ep	disint	NA	pres	ant	pfvbnc	ant	n	act	dyn	EAT	n	3p	y	y	y	maincl	NA	decl	pos	NA	y	n	n	noef	ass	ass	dir	NA	NA	NA
# Seven years earlier I had been an exhausted, overweight mother of two, struggling with postpartum depression, when I caught a fitness infomercial. The women shown were so full of energy and life -- things I wanted for myself. That' s when it dawned on me: Maybe I could get my life under control again. I started with just 15 minutes of exercise)%>a day, and within a few months, I was completing …	120	102	COULD	COCA:2014:MAG	MAG	13	Prevention	vb	NA	NA	root	pos	ns	op	circ	n	pres	sim	presvb	NA	n	act	dyn	GET	n	1s	y	y	n	maincl	NA	decl	pos	NA	n	n	n	noef	ass	ass	dir	NA	NA	MAYBE+AGAIN
# The 25I-NBOMe, which sent Suzuki's patient into a suicidal frenzy, is especially potent and also made the mice hyperactive, Halberstadt says. # NBOMes chemically resemble mescaline, a compound found in the peyote cactus . They don't spike dopamine levels and aren't addictive. But an overdose can prompt paranoia, seizures, a racing heart or high blood pressure. NBOMes masquerade)%>as extra serot…	121	12	CAN	COCA:2015:MAG	MAG	13	ScienceNews	vb	NA	NA	root	pos	ws	gsp	circ	NA	pres	sim	presvb	NA	n	act	dyn	PROMPT	n	3s	n	n	n	maincl	NA	decl	pos	NA	n	n	n	noef	ass	ass	dir	NA	NA	NA
# The recent events in Afghanistan highlight why the U.S. almost always wins the war, then loses the peace. We go in as liberators, then stay to become oppressors. As liberators we defeat the enemy and as oppressors we stay to see the enemy become the heroes. # Our presidents must really love their wartime powers to pass up so many opportunities to exit as heroes)%>. # Gary Hall, Denver # The " w…	122	49	MUST	COCA:2012:NEWS	NEWS	14	Denver	adv	NA	NA	ep	nec	ws	ep	disint	NA	pres	sim	presvb	NA	n	act	st	LOVE	n	3p	y	n	n	maincl	NA	decl	pos	NA	n	n	n	noef	exp	exp	indir	NA	m	REALLY
# These trees grow on the tops of mountains. The weather is harsh and windy. Most plants die in this weather. The bristlecone may look dead, too. # Many of its branches may be twisted or broken. Much of its bark may be missing. Some of its needles may have fallen off. Do nt be fooled by its looks. # The bristlecone)%>is a survivor. Its bark is thick and tough. Bugs cant drill into it. The trees s…	123	272	MAY	COCA:2012:MAG	MAG	13	NationalGeographic	vb	NA	NA	ep	pos	ws	ep	disint	NA	pres	ant	pfvbnc	ant	n	act	dyn	FALL OFF	n	3p	n	n	n	maincl	NA	decl	pos	NA	n	n	n	noef	ass	ass	dir	NA	NA	NA
# We also have our history. From the Haitian slave uprisings of the 1800s, the American labor struggles of the 1930s, the Cuban revolution of the 1950s, to the student uprisings of the 1960s, we have much to learn. As Egyptian feminist Naval El Saadawi said, '' You must learn from the past, live in the present, and work toward the future)%>. " We must continue to form the bonds of solidarity. We …	124	214	MUST	COCA:2001:ACAD	ACAD	14	Humanist	vb	NA	NA	root	nec	ws	gsn	disint	NA	pres	sim	presvb	NA	n	act	dyn	LEARN	n	2s	y	y	y	maincl	NA	decl	pos	NA	n	n	n	noef	ass	ass	dir	NA	NA	NA
# What really happened? # If we are to discover' what really happened' we have to look first at who might have been able to observe the events in more general terms and also at whether there were fixed details, such as the position taken up by the English, which can be found in the comments of a number of witnesses. In terms of the)%>action we can say no more than that the French onslaught seems …	125	13	CAN	COCA:2013:MAG	MAG	13	HistoryToday	vb	NA	NA	root	pos	ws	gsp	circ	NA	pres	sim	presvb	NA	n	pas	dyn	FIND	n	3s	n	n	n	sub.relcl	NA	NA	pos	NA	n	n	n	noef	ass	ass	dir	NA	NA	NA
# While the research synthesis revealed the lack of reliability reporting in the existing literature, the meta-analysis approach was primarily based on the past records, and can not automatically result in a new method of reliability generalization. In essence, to generalize an empirical index in various applications, the statistical computing must be flexible to represent specific conditions of …	126	96	MUST	COCA:2002:ACAD	ACAD	14	InstrPsych	vb	NA	NA	root	nec	ws	gsn	cond	NA	pres	sim	presvb	NA	n	act	st	BE	n	3s	n	n	n	maincl	NA	decl	pos	NA	n	n	n	noef	ass	ass	dir	NA	NA	NA
# Within parishes, however, there is often little preparation or training for how to respond to a death by suicide. Details such as how to handle the funeral planning or what to offer in terms of bereavement services can be critical components of outreach to suicide survivors, and a pastoral approach can make a big difference in the healing process. # Ann Sherzer, cochair of)%>the Council on Ment…	127	14	CAN	COCA:2014:MAG	MAG	13	USCatholic	vb	NA	NA	root	pos	ws	gsp	circ	NA	pres	sim	presvb	NA	n	act	dyn	MAKE	n	3s	n	n	n	maincl	NA	decl	pos	NA	n	n	n	noef	ass	ass	dir	NA	NA	NA
# Yet although scripture was so central to Ibn Abd al-Wahhab's ideology, by insisting that his version of Islam alone had validity, he had distorted the Quranic message. The Quran firmly stated that " There must be no coercion in matters of faith '' (2:256), ruled that Muslims must believe in the revelations of all the great prophets (3:84) and that religious)%>pluralism was God's will (5:48). Mu…	128	93	MUST	COCA:2014:MAG	MAG	13	NewStatesman	vb	NA	NA	root	nec	ns	subjextn	rul	n	pres	sim	presvb	NA	n	act	st	BELIEVE	n	3p	y	n	y	sub.nomcl	RULE	NA	pos	NA	n	n	n	noef	ass	ass	dir	NA	NA	NA
# Yet our lawyerly intuitions -- indeed, even the intuitions of the most public-law-oriented Court in our judicial system -- tell us otherwise. It is time to listen to those instincts. To gain a genuinely realistic sense of what tort law actually does, what it can do, and what it ought to do, we must dispense with the notion that tort law ought to be public regulatory law because that is the only…	129	405	OUGHT TO	COCA:2004:ACAD	ACAD	14	LawPublicPol	vb	n	NA	root	nec	ns	perm	rul	n	pres	sim	presvb	NA	n	act	dyn	DO	n	3s	n	n	n	sub.nomcl	A SENSE OF	NA	pos	NA	n	n	n	noef	ass	ass	dir	NA	NA	NA
##148187 1:00-2:00 PM, This is WEEKEND EDITION from NPR News. I'm Scott Simon. Secretary DONALD RUMSFELD (Defense Department): (From Wednesday): If we have to go into 15 more countries, we ought to do it to deal with the problem of terrorism so we don't allow this problem to damage and kill tens and thousands more people. SIMON: Defense Secretary Donald Rumsfeld speaking to reporters at the Penta…	130	200	OUGHT TO	COCA:2002:SPOK	SPOK	14	NPR_Saturday	vb	n	NA	root	nec	ns	subjextn	disint	n	pres	sim	presvb	NA	n	act	dyn	DO	n	1p	y	y	n	maincl	NA	decl	pos	NA	n	n	n	noef	dir	dir.ord	dir	NA	NA	NA
##2020625 If you're like every other Black woman, you've got too much to worry about, to much to do. Somewhere near the bottom of the to-do list are probably the things you know you ought to do, must do, to take care of yourself. If you have n't been looking after your own needs, you may have noticed little things breaking down. Maybe it's physical -- fatigue, stomach trouble, neck pain, headache…	131	337	OUGHT TO	COCA:1992:MAG	MAG	13	Essence	vb	n	NA	root	nec	ns	subjextn	circ	n	pres	sim	presvb	NA	n	act	dyn	DO	n	2s	y	y	n	maincl	NA	decl	pos	NA	n	n	n	noef	ass	ass	dir	NA	NA	NA
##2034018 Section: MEDICAL-CARE UPDATE Stop foot pain before it stops you # You've certainly had worse aches and pains to worry about. Nagging pain in your big toes seems like something you ought to ignore. I know -- it happened to me recently, and I tried to shrug off the pain. But it got so that I did n't want to put those hurting toes into my Rockports anymore. When the problem threatened my w…	132	159	OUGHT TO	COCA:1996:MAG	MAG	13	Prevention	vb	n	NA	root	nec	ns	subjextn	circ	n	pres	sim	presvb	NA	n	act	dyn	IGNORE	n	2s	y	y	n	sub.relcl	NA	NA	pos	NA	n	n	n	noef	ass	ass	dir	NA	NA	NA
##231849 HOST: Rush Limbaugh EXECUTIVE-PRODUCER: Roger Ailes " Unidentified Announcer ": And now it's time for Presidential Dreams.' " President BILL CLINTON ": (Seated at Rush Limbaugh's desk) Debbie, makeup. This is the way things really ought to be. RUSH-LIMBAUGH: (Voiceover) In your dreams, pal. No way. Ha, ha, ha. Announcer: Ladies and gentlemen, Mr. Rush Limbaugh. LIMBAUGH: Thank you. Thank…	133	358	OUGHT TO	COCA:1994:SPOK	SPOK	14	Ind_Limbaugh	vb	n	NA	root	nec	ws	gsn	circ	NA	pres	sim	presvb	NA	n	act	st	BE	n	3p	n	n	y	maincl	NA	decl	pos	NA	n	n	n	noef	ass	ass	dir	str	im	REALLY
##244942 NEAL-CONAN-host: Time now for the TALK OF THE NATION Opinion Page. We hear a lot these days from celebrities and politicians who urge us to help '' save '' Africa. As well intentioned as those appeals might be, Uzodinma Iweala argues Africa is not in need of saving. In fact)%>, he says, many of the celebrity campaigns wind up promoting the same old stereotype of Africa as a black hole of…	134	114	MIGHT	COCA:2007:SPOK	SPOK	14	NPR_TalkNation	vb	NA	NA	ep	pos	ws	ep	disint	NA	pres	sim	presvb	NA	n	act	st	BE	n	3p	n	n	n	sub.compcl	NA	NA	pos	NA	n	n	n	str	ass	ass	dir	NA	NA	NA
##3021991 # Excerpts from the report released Tuesday by an independent ethics panel for the Salt Lake Organizing Committee: # 1991-92 - The Campaign Begins # ... In November 1991, the wife of Seiuli Paul Wallwork, an IOC member from Western Somoa, sent a letter to Mr. Welch stating that she needed to speak with Mr. Welch on '' a matter of great urgency. '' The substance of Mrs. Wallwork's reques…	135	352	NEED TO	COCA:1999:NEWS	NEWS	14	AssocPress	vb	n	pret	root	nec	ns	subjextn	circ	n	pastsub	sim	presvb	NA	n	act	dyn	SPEAK	n	3s	y	y	n	sub.nomcl	STATE	NA	pos	NA	n	n	n	noef	ass	ass	dir	NA	NA	NA
##4011294 Should we put an end to projection at the end of this century, at the end of this millennium ? # The advent of technological innovation both in art and in communication -- we must be determined to inscribe these two words in their reciprocal proximity and their irreducibility --)%>suggests such a possibility. # Projection arises from a little known history belonging to the fields of phy…	136	240	MUST	COCA:2004:ACAD	ACAD	14	October	vb	NA	NA	root	nec	ns	subjextn	disint	n	pres	sim	presvb	NA	n	act	st	BE	n	1p	y	n	n	maincl	NA	decl	pos	NA	n	n	n	noef	ass	ass	dir	NA	NA	NA
##4018845 Section: BOOK REVIEWS AND NOTES PREFORMATTED TABLE # This historical study of modernity is a richly documented, yet highly personal, assessment of the cultural present. In addition, it offers a vigorous argument concerning the stance we ought to take in regard to the coherence and meaning of our world and our relations to and within it. The name given that stance is " irony, " a recogni…	137	35	OUGHT TO	COCA:2003:ACAD	ACAD	14	ChurchHistory	vb	n	NA	root	nec	ns	subjextn	circ	n	pres	sim	presvb	NA	n	act	dyn	TAKE	n	1p	y	y	n	sub.relcl	NA	NA	pos	NA	n	n	n	noef	ass	ass	dir	NA	NA	NA
##4025599 San Diego golf pro PHIL RODGERS not only looked like Jack Nicklaus-he could have been the guy who made sure you never heard of Nicklaus. The living room of Phil Rodgers' San Diego bungalow looks like a memorabilia shop-full of relics of a career that was and another that might have been. A large framed photo of Cypress Point adorns a wall covered in)%>tartan wallpaper. A thigh-high winn…	138	167	MIGHT	COCA:2008:MAG	MAG	13	GolfMag	vb	NA	NA	ep	pos	ws	ep	disint	NA	pres	ant	pfvbnc	ant	n	act	st	BE	n	3s	n	n	n	sub.relcl	NA	NA	pos	NA	n	n	n	noef	ass	ass	dir	NA	NA	NA
##4072913 DONNY DEUTSCH, co -host: Before we started, I have to, you know, we are friends. We -- people do n't know about you, this is the nicest woman on the planet. I have to say this, I just -- you didn't know I was going to say this. HODA-KOTB-co-host: No, I did not. DEUTSCH: You, you know, you have this whole camera presence. KOTB: Uh-huh. DEUTSCH: I want the audience to know is what you	139	105	HAVE TO	COCA:2010:SPOK	SPOK	14	NBC_Today	vb	n	pres	root	nec	ns	subjextn	circ	y	pres	sim	presvb	NA	n	act	dyn	SAY	n	1s	y	y	n	maincl	NA	decl	pos	NA	n	n	n	noef	hedperf	hedperf.ass	dir	NA	NA	NA
##4078682 Barry Salzberg is chief executive of Deloitte. He is also a member of Deloitte's U.S. board of directors, the Deloitte Touche Tohmatsu global executive committee and the DTT global board of directors. # To motivate people, words need to become action. As we head into the upturn and the expanding job market that will go with it, leaders would do well to focus their efforts around four cr…	140	141	NEED TO	COCA:2010:NEWS	NEWS	14	WashPost	vb	n	pres	root	nec	ws	gsn	cond	NA	pres	sim	presvb	NA	n	act	dyn	BECOME	n	3p	n	n	n	maincl	NA	decl	pos	NA	n	n	n	noef	ass	ass	dir	NA	NA	NA
##4079356 On a dark, rainy night outside of Seattle, Bella Swan is at a life crossroads. With an army of vampires out for blood (hers), she must hide out in the woods between two supernatural hotties. Vampire Edward Cullen (Robert)%>Pattinson) wants to protect his freezing mortal girlfriend from frostbite but must defer to his arch enemy, werewolf Jacob Black (Taylor Lautner). " After all, I'm ho…	141	447	MUST	COCA:2010:NEWS	NEWS	14	Chicago	vb	NA	NA	root	nec	ns	subjextn	circ	n	pres	sim	presvb	NA	n	act	dyn	HIDE OUT	n	3s	y	y	n	maincl	NA	decl	pos	NA	n	n	n	noef	ass	ass	dir	NA	NA	NA
##4084059 The pill works equally well in obese females and thinner individuals, as reported in a study comparing the effectiveness of the birth control pill in women with marked weight differences. This finding refutes a long-held conviction among many doctors that the pill may not prevent pregnancy reliably in women who are overweight or obese. With obesity a)%>significant health issue in the U.…	142	296	MAY	COCA:2010:MAG	MAG	13	USAToday	neg.vb	NA	NA	ep	pos	ws	ep	disint	NA	pres	sim	presvb	NA	n	act	st	PREVENT	n	3s	n	n	y	sub.relcl	NA	NA	not	negprop	n	n	n	noef	ass	ass	dir	NA	e	RELIABLY
##4084791 The 1985 Chicago Bears may or may not be the greatest team of all time, but we know this: Like an earthquake without an aftershock, they're the most devastating collection of players never to win a second Super Bowl. '' From' 84 to' 88, we should've won them all, '' says their quarterback, Jim McMahon. '' We)%>should've won five straight. " If that sounds bold, well, consider the source…	143	52	SHOULD	COCA:2011:MAG	MAG	13	SportingNews	vb	NA	NA	root	nec	ns	subjextn	circ	n	past	sim	pfvbc	count	n	act	dyn	WIN	n	1p	y	y	n	maincl	NA	decl	pos	NA	n	y	n	noef	ass	ass	dir	NA	NA	NA
##4086786 It's been so long since Apple made misstep that we almost forgot that the company could still make one. It may be that we're wrong, and the iPad will revolutionize multimedia viewing. But)%>the initial reactions to the device - that it's an overgrown iPod Touch, that it does half of what a MacBook can do for the price of a used Dell - are pretty bruising. And then there	144	284	MAY	COCA:2010:NEWS	NEWS	14	SanFranChron	vb	NA	NA	ep	pos	ws	ep	disint	NA	pres	sim	presvb	NA	n	act	st	BE	y	3s	n	n	n	maincl	NA	decl	pos	NA	n	n	n	str	ass	ass	dir	NA	NA	NA
##4111059 Whatever your issue -- procrastination, perfectionism, lateness -- here are inspired ideas and smart solutions to get time back on your side # For busy women -- and who is n't busy these days? -- daily life is a constant negotiation between the things that need to be done and the time available to do them. That means we're always on the lookout for shortcuts and time-saving strategies, …	145	96	NEED TO	COCA:2012:MAG	MAG	13	GoodHousekeeping	vb	n	pres	root	nec	ws	gsn	circ	NA	pres	sim	presvb	NA	n	pas	dyn	DO	n	3p	n	n	n	sub.relcl	NA	NA	pos	NA	n	n	n	noef	ass	ass	dir	NA	NA	NA
##4113834 European nations and Russia proposed rival U.N. resolutions Friday morning, both calling for expanding the number of U.N. cease-fire monitors in Syria from 30 to 300 but disagreeing on possible sanctions and on how quickly the larger observer force should get on the ground. # After several hours of negotiations by Security Council experts)%>, Russia circulated a merged text, and council…	146	131	SHOULD	COCA:2012:NEWS	NEWS	14	AssocPress	vb	NA	NA	root	nec	ns	subjextn	disint	n	pres	sim	presvb	NA	n	act	dyn	GET	n	3s	y	y	n	maincl	NA	decl	pos	NA	n	n	n	noef	ass	ass	dir	NA	NA	NA
$11 has passed the state Senate; the House of Representatives will consider a similar measure this year. If that fails, a coalition of unions and advocacy groups will try to get the issue on the ballot in November. Proponents say the minimum wage has failed to keep pace with inflation and can not support a household above the poverty line. Opponents say relatively few minimum-wage workers)%>are a…	147	15	CAN	COCA:2014:NEWS	NEWS	14	USAToday	neg.vb	NA	NA	root	pos	ws	gsp	circ	NA	pres	sim	presvb	NA	n	act	dyn	SUPPORT	n	3s	n	n	n	sub.nomcl	SAY	NA	not	negmod	n	n	n	noef	ass	ass	dir	NA	NA	NA
$65. A portion of the proceeds benefit Project Angel Heart and Metro CareRing. Reservations required. The Lobby, 2191 Arapahoe St., wheretoeat.in/2014 denver bacon and beer festival Bacon and Beer Festival Nov. 16: The third annual festival highlights 18 breweries and more than 25 restaurants, 2:30 5 p.m. Must be 21 and over. $46.50. A portion of the proceeds benefit Project Angel)%>Heart and Met…	148	189	MUST	COCA:2014:NEWS	NEWS	14	Denver	vb	NA	NA	root	nec	ws	gsn	rul	NA	pres	sim	presvb	NA	n	act	st	BE	n	NA	NA	NA	NA	maincl	NA	decl	pos	NA	n	n	n	noef	ass	ass	dir	NA	NA	NA
$70,599 on Kickstarter last year. Now, it's distributing to co-ops in Boston and Seattle and is in talks with big-box stores. A cricket protein bar called Exo attracted $54,911 on Kickstarter in 2013; the start-up has since sold several hundred thousand bars, raised an additional $1.2 million, and may appear in JetBlue snack packs later this year. And Next Millennium Farms, which)%>sells four mad…	149	334	MAY	COCA:2015:MAG	MAG	13	PopScience	vb	NA	NA	ep	pos	ws	ep	disint	NA	pres	pos	presvb	NA	n	act	dyn	APPEAR	n	3s	y	n	n	maincl	NA	decl	pos	NA	n	n	n	noef	ass	ass	dir	NA	e	LATER
(2004) accompanying a car chase scene with the purpose of emotionally influencing spectators who are watching the film can be considered a non-diegetic treatment of the music.3 This treatment of music is dependent on the notion that the car chase music isn't established from within the film's narrative world and thus can not be heard by the Kirill character in pursuit of Jason Bourne during the c…	150	16	CAN	COCA:2015:ACAD	ACAD	14	MusicEduc	neg.vb	NA	NA	root	pos	ws	gsp	circ	NA	pres	sim	presvb	NA	n	pas	st	HEAR	n	3s	n	n	n	sub.nomcl	ON THE NOTION THAT	NA	not	negmod	n	n	n	noef	ass	ass	dir	NA	im	THUS
(2005, 2008) argues, embedded resistance to educational equity (i.e., structural racism and poverty) allows education policies to serve as vehicles for White racial hegemony, reinforcing White privilege and promoting a colorblind egalitarianism . His notion of tacit intentionality puts forth that pervasive educational racial and class-based inequity may not be a malicious intent on behalf of poli…	151	417	MAY	COCA:2013:ACAD	ACAD	14	CommCollegeR	neg.vb	NA	NA	ep	pos	ws	ep	disint	NA	pres	sim	presvb	NA	n	act	st	BE	n	3s	n	n	n	sub.nomcl	PUT FORTH	NA	not	negprop	n	n	n	noef	ass	ass	dir	NA	NA	NA
(2008) found that classroom writing instruction was frequently designed to help prepare students for high-stakes assessments. Although high-stakes assessments may guarantee that what is assessed is taught, they do not guarantee quality classroom instruction nor necessarily promote effective teaching and can come with unintended consequences. # For example, assessments may promote a formulaic appr…	152	5	MAY	COCA:2014:ACAD	ACAD	14	ReadingTeacher	vb	NA	NA	ep	pos	ws	ep	disint	NA	pres	sim	presvb	NA	n	act	dyn	PROMOTE	n	3p	n	n	n	maincl	NA	decl	pos	NA	n	n	n	noef	ass	ass	dir	NA	initial	FOR EXAMPLE
(6 teaspoons). First, consider that you need a sugar reality check. # Last year, when I was writing 77k Sugar Smart Diet, we recruited volunteers to put our expert-developed 32-day plan to the test. We asked them to keep a diary for a few days so they could gain some insight into their own sugar intake. One panelist, who was not)%>overweight but suffered nonstop food cravings, discovered that he …	153	148	COULD	COCA:2014:MAG	MAG	13	Prevention	vb	NA	NA	root	pos	ns	op	circ	n	pastsub	sim	presvb	NA	n	act	dyn	GAIN	n	3p	y	n	n	sub.advcl	SO THAT	NA	pos	NA	n	n	n	noef	ass	ass	dir	NA	NA	NA
(as when consumers recycle or conserve water). Another crucial set of issues that must be addressed by a truly sustainable society is global issues, such as acid rain, global warming, and ozone depletion. The Role of Government # Much of the policymaking, planning, and conservation measures ought to be undertaken mainly at the local level by state, county, and tribal governments, which in many ca…	154	412	OUGHT TO	COCA:1990:ACAD	ACAD	14	Environment	vb	n	NA	root	nec	ws	gsn	disint	NA	pres	sim	presvb	NA	n	pas	dyn	UNDERTAKE	n	3p	y	n	n	maincl	NA	decl	pos	NA	n	n	n	noef	ass	ass	dir	NA	ie	MAINLY
(Coyle) Chase, 1950 The Hasty Heart, John Patrick, 1949 Having Wonderful Time, Arthur Kober, 1938 Holiday, Philip Barry, 1938 Home of the Brave, Arthur Laurents, 1949 Hughie, Eugene O'Neill, 1981 I Never Sang for My Father, Robert Anderson, 1970 I Ought To Be in Pictures, Neil Simon, 1982 Idiot's Delight, Robert Sherwood , 1939 The Impossible Years, Bob Fisher &; Arthur Marx, 1968 In Celebration,…	155	118	OUGHT TO	COCA:1996:ACAD	ACAD	14	AmerStudies	vb	n	NA	root	nec	ws	gsn	disint	NA	pres	sim	presvb	NA	n	act	st	BE	n	1s	y	n	n	maincl	NA	decl	pos	NA	n	n	n	noef	ass	ass	dir	NA	NA	NA
(D-Vt.), chairman of the Senate Judiciary Committee, called for open hearings with White House and Justice Department officials. # Key Republicans agreed that hearings are in order, including Sen. John Cornyn (R-Texas) , a long-time friend of Gonzales from their days in Texas. # '' We ought to follow the facts wherever they lead, '' Cornyn said. '' This should not be a partisan issue. It should b…	156	170	OUGHT TO	COCA:2007:NEWS	NEWS	14	Atlanta	vb	n	NA	root	nec	ns	subjextn	disint	n	pres	sim	presvb	NA	n	act	dyn	FOLLOW	n	1p	y	y	n	maincl	NA	decl	pos	NA	n	n	n	noef	ass	ass	dir	NA	NA	NA
(e.g., the EC used in this study) to permit the participants to evaluate the data they collect and process about themselves. Third, participants must be able to evaluate, and make judgments about the data they obtain. What areas need change or improvement? What is currently effective and should continue? # The fourth step was for participants to learn to evaluate any changes)%>prior to (i.e., ant…	157	111	SHOULD	COCA:2009:ACAD	ACAD	14	SportBehavior	vb	NA	NA	root	nec	ws	gsn	circ	NA	pres	sim	presvb	NA	n	act	dyn	CONTINUE	n	3s	n	n	n	maincl	NA	int	pos	NA	n	n	n	noef	ass	ass	indir	NA	NA	NA
(Excerpt-from-Dorit) Ms-ANN-RICHARDS-1: Mario, I have n't seen a change like this since I was knee-high to a June bug. Mr-MARIO-CUOMO-1F: Ann, I was as surprised as you are. Ms-RICHARDS: Well, I should have seen it coming. Mr-CUOMO: Maybe so, but now I think we ought to accept this change, embrace it, be positive about it because change can be very exciting. Ms-RICHARDS: You're probably right, Ma…	158	454	OUGHT TO	COCA:1995:SPOK	SPOK	14	CBS_Sixty	vb	n	NA	root	nec	ns	subjextn	disint	n	pres	sim	presvb	NA	n	act	dyn	ACCEPT	n	1p	y	y	n	sub.nomcl	THINK	NA	pos	NA	n	n	n	noef	ass	ass	dir	NA	NA	NA
(for review, see Chard, Vaughn, & Tyler, 2002; Katzir et al., 2006; Rasinski, Samuels, Hiebert, Petscher, & Feller, 2011). According to Breznitz (2006) , lack of temporal coordination, supported by the timing mechanisms of working memory, may lead to asynchrony among the different processes involved in reading, resulting in slow reading)%>(Breznitz, 2006; Horowitz-Kraus & Breznitz, 2011). It foll…	159	374	MAY	COCA:2014:ACAD	ACAD	14	LearningDisability	vb	NA	NA	ep	pos	ws	ep	disint	NA	pres	sim	presvb	NA	n	act	dyn	LEAD TO	n	3s	n	n	n	maincl	NA	decl	pos	NA	n	n	n	noef	ass	ass	dir	NA	NA	NA
(http: **52;33017;TOOLONG), or Skype (http: **32;33071;TOOLONG). Another way to extend social learning is to invite former students back into the online course room to engage with current students, especially if former students have completed degrees or are now working in the field. # Online instructors should also be alert to evolving technologies for connection. For example, one newly introduce…	160	288	SHOULD	COCA:2012:ACAD	ACAD	14	DeltaKappaGamma	adv	NA	NA	root	nec	ns	subjextn	cond	n	pres	sim	presvb	NA	n	act	st	BE	n	3p	y	n	y	maincl	NA	decl	pos	NA	n	n	n	noef	ass	ass	dir	NA	m	ALSO
(IRB) and the Maine EMS Board. Interviews were arranged with each site's CP coordinator and key personnel involved in the CP initiative, including the EMS director, primary care physician, and other community paramedics as available. For the majority of the interviews, only one or two staffwere able to be interviewed; in a few cases, the CP pilot site's medicaldirector was present. The interviews…	161	449	BE ABLE TO	COCA:2017:ACAD	ACAD	14	...and Human Services Administra...	vb	NA	pret	root	pos	ws	gsp	circ	NA	past	sim	presvb	NA	n	pas	dyn	INTERVIEW	n	3p	y	n	n	maincl	NA	decl	pos	NA	n	n	n	noef	ass	ass	dir	NA	NA	NA
(Janson &; Hazler, 2004) have long been a focus of international research, there is scarce literature on the specific combination of these variables. The core questions for this study are as follows: * What do youth who are currently exposed to repetitive bullying believe their personal level of trauma might be after reading a hypothetical bullying scenario? * What variables commonly associated w…	162	351	MIGHT	COCA:2008:ACAD	ACAD	14	SchoolCounsel	vb	NA	NA	root	pos	ws	gsp	circ	NA	pres	sim	presvb	NA	n	act	st	BE	n	3s	n	n	n	sub.nomcl	BELIEVE	NA	pos	NA	n	n	n	noef	ass	ass	dir	NA	NA	NA
(Nick Giannetto; exterior of police station; Jason Flores) ANDREA-CANNING- (vo# 49:18): What Nick did n't know was the real reason Jason was MIA: he was behind bars. Detectives had brought him in for questioning and discovered he had an unrelated harassment warrant, so they were able to detain him. (09:49:33): Two days Jason was with investigators? JANET-ALBERTSON- (0# 49:36): Yes. He spent a sig…	163	77	BE ABLE TO	COCA:2017:SPOK	SPOK	14	NBC: Dateline NBC	vb	NA	pret	root	pos	ns	op	circ	y	past	sim	presvb	NA	n	act	dyn	DETAIN	n	3p	y	y	n	maincl	NA	NA	pos	NA	n	n	n	noef	ass	ass	dir	NA	NA	NA
(Off-camera) I mean that, to me, is phenomenal. After doing as well as they did in that campaign, they, they let this public - I mean nobody had ever of a public option. Suddenly , it became the holy grail. You know, it's absurd. They should have just been out there day after day saying, 30 more million people insured)%>and you do n't have pre-existing conditions uncovered. TERRY-MORAN-1-ABC# (Of…	164	385	SHOULD	COCA:2010:SPOK	SPOK	14	ABC_ThisWeek	vb	NA	NA	root	nec	ns	subjextn	disint	n	past	sim	pfvbnc	count	n	act	st	BE	n	3p	y	n	n	maincl	NA	decl	pos	NA	n	y	n	noef	exp	exp	dir	weak	m	JUST
(overleaf). # The next article in this series will look at the key competencies and resources for setting up and running a dedicated menopause clinic. Satisfaction has conclusively been shown to be higher among women attending structured clinics for menopausal care than among those who do not. Primary care professionals should implement nurse-led menopause services to address this need and offer …	165	162	SHOULD	COCA:2011:ACAD	ACAD	14	PracticeNurse	vb	NA	NA	root	nec	ns	subjextn	circ	n	pres	sim	presvb	NA	n	act	dyn	IMPLEMENT	n	3p	y	y	y	maincl	NA	decl	pos	NA	n	n	n	noef	ass	ass	dir	NA	NA	NA
(vo# Eventually Patty's family drifted away. Then the police went, too. And having collected what they needed, they unsealed the house, blood spatters and all; which not only allowed Patty to return , it gave Ron's family members their first horrifying look inside. KEN-PRESBA# You could see blood spatter on the stove, on the ceiling. It looked just like)%>somebody took a spatter gun and spattered…	166	386	COULD	COCA:2014:SPOK	SPOK	14	NBC	vb	NA	NA	root	pos	ws	gsp	circ	NA	past	sim	presvb	NA	n	act	st	SEE	n	2s	y	n	y	maincl	NA	decl	pos	NA	n	n	n	noef	ass	ass	dir	NA	NA	NA
) echoed this sentiment, although they later contended that for the purposes of providing educational assistance, " It is more appropriate to use a broad definition of giftedness when we study the population of dropouts " (p. 269). Given the different possible pathways to dropping out, many of which might interact with ability level, it seems vital to address the dropout question within groups)%>…	167	299	MIGHT	COCA:2006:ACAD	ACAD	14	RoeperReview	vb	NA	NA	ep	pos	ws	ep	disint	NA	pres	sim	presvb	NA	n	act	dyn	INTERACT	n	3p	n	n	n	sub.relcl	NA	NA	pos	NA	n	n	n	noef	ass	ass	dir	NA	NA	NA
) For you will look smart and feel ignorant, and the patient will not know which day it is for you. For you will pretend to be smart out of ignorance... BLOCK: The interns follow along , some scan ahead, restless. Dr-OFRI: (Reading) For you may need to strain to hear the voice of the patient in the thin reed of his crying. For you will learn to see most acutely out of the corner of your eye, to h…	168	41	NEED TO	COCA:2003:SPOK	SPOK	14	NPR_ATC	vb	n	toinf	root	nec	ns	subjextn	circ	n	pres	sim	presvb	NA	n	act	dyn	STRAIN	n	2s	y	y	y	maincl	NA	decl	pos	NA	n	n	n	noef	ass	ass	dir	NA	NA	NA
) His wife and two sons, ages 31 and 33, who live with him, have full-time jobs but help out with walking and feeding the dogs on weekends, often Fabiani's busiest time. To develop return clientele, on which his current business depends, he says, '' You have to have patience, credibility, honesty. '' # Can someone earn a living as a Rover.com dog-sitter? " You're not going to get rich, " Fabiani …	169	113	HAVE TO	COCA:2015:MAG	MAG	13	SatEvenPost	vb	n	pres	root	nec	ns	subjextn	cond	n	pres	sim	presvb	NA	n	act	st	HAVE	n	2s	y	n	y	maincl	NA	decl	pos	NA	n	n	n	noef	ass	ass	indir	NA	NA	NA
) in a drawer or chest, place it in a cotton pillowcase. To avoid temperature extremes, do n't stow in an attic or basement. Never dry-clean a coverlet; have it wet-cleaned by a textile professional . Styles &; Signatures Geometric designs depended on geometric forms, but an expert weaver might suggest curvilinear flourishes (below right, center). From the late 1820s,)%>figured coverlets reflecte…	170	379	MIGHT	COCA:2007:MAG	MAG	13	CountryLiving	vb	NA	NA	ep	pos	ws	ep	disint	NA	pres	sim	presvb	NA	n	act	dyn	SUGGEST	n	3s	y	y	y	maincl	NA	decl	pos	NA	n	n	n	noef	ass	ass	dir	NA	NA	NA
) indicated that counselors can assess preferred modalities in as few as 50 to 100 words. The second step involves determining which modality might help the teacher to understand the situation in a way that is likely to effect change in the classroom environment. For example, a teacher whose preference is concrete might benefit from seeing patterns emerging in his or her classroom (i.e., formal-o…	171	80	MIGHT	COCA:2007:ACAD	ACAD	14	SchoolCounsel	vb	NA	NA	ep	pos	ws	ep	disint	NA	pres	sim	presvb	NA	n	act	dyn	BENEFIT	n	3s	n	n	y	maincl	NA	decl	pos	NA	n	n	n	noef	ass	ass	dir	NA	NA	NA
) Response Cost (RC). Prior to the start of this phase, Andrew was shown the token board and provided rules regarding earning tokens (i.e., " You will get a token when you do what we ask you to do. Once you have 10 tokens, you will be able to have a break and play with me. '') During these sessions,the therapist (or teacher) presented demands intermittently. Problem behavior did not result in a b…	172	478	BE ABLE TO	COCA:2014:ACAD	ACAD	14	EducTreatmenChildren	vb	NA	fut	root	pos	ws	sitperm	rul	NA	fut	sim	presvb	NA	n	act	st	HAVE	n	2s	y	n	n	maincl	NA	decl	pos	NA	n	n	n	noef	ass	ass	dir	NA	NA	NA
) Whatever difficulties police may encounter because of new criminal procedure requirements pale in comparison to the burden we inflict on them when we leave each officer with, in effect, more than four times as many violent crimes to handle. # It is in this light that I want to do what must be very bad form in a criminal procedure symposium, and that is to insist)%>that we stop our obsessive foc…	173	113	MUST	COCA:2001:ACAD	ACAD	14	MichLawReview	vb	NA	NA	ep	nec	ws	ep	disint	NA	pres	sim	presvb	NA	n	act	st	BE	n	3s	n	n	n	sub.nomcl	DO	NA	pos	NA	n	n	n	noef	ass	ass	dir	NA	NA	NA
) worry that Move On may be pushing an agenda to liberal and polarizing to win in 2004. UNIDENTIFIED MALE: There's a real danger that the internet will take us off the deep end ideologically, so that it won't matter how money we can raise, we won't be able to win the argument. (BEGIN VIDEO CLIP) HOWARD DEAN, PRESIDENTIAL CANDIDATE: We need a new president. (END VIDEO CLIP) BROWNSTEIN: Move On min…	174	52	BE ABLE TO	COCA:2004:SPOK	SPOK	14	CNN_Presents	vb	NA	fut	root	pos	ws	gsp	circ	NA	fut	sim	presvb	NA	n	act	dyn	WIN	n	1p	y	n	y	maincl	NA	NA	notc	negmod	n	n	n	noef	ass	ass	dir	NA	NA	NA
). # Beyond a certain depth of search, there does n't seem to be any free help. For $299, a little spit, and no sweat, 23andMe (**25;636;TOOLONG? gclid=CI7ajtP7z7M... will test your DNA and tell you your ancestry composition, genetic relatives, and Neanderthal percentage--something you may have always worried about. Or, for $199.95, join the more than half)%>million people who are participating i…	175	354	MAY	COCA:2012:MAG	MAG	13	NaturalHist	vb	NA	NA	ep	pos	ws	ep	disint	NA	pres	ant	pfvbnc	ant	n	act	dyn	WORRY	n	2s	y	n	n	sub.relcl	NA	NA	pos	NA	n	n	n	noef	ass	ass	dir	NA	m	ALWAYS
). # The view of fatalism as irrational, passive, and anti-science is held not only by outside Western observers, but is also part of an internal debate among Muslims, including one that preceded the presumptions of Western modernity. Muslim religious scholars have long debated the terms under which one should cultivate steadfastness, under what circumstances one should seek technological interve…	176	3	SHOULD	COCA:2009:ACAD	ACAD	14	AnthropolQ	vb	NA	NA	root	nec	ws	gsn	rul	NA	pres	sim	presvb	NA	n	act	dyn	CULTIVATE	n	3s	y	y	y	sub.relcl	NA	NA	pos	NA	n	n	n	noef	ass	ass	dir	NA	NA	NA
). But when topless pics of Kate were published, the public -- and the Palace -- rose up in outrage and defense of the princess and her privacy. # Now we have all the more reason to cheer Kate on, as she battles acute morning sickness -- a rare condition that may last the full nine months. Already the joy has been darkened by the suicide)%>of Jacintha Saldanha, one of two nurses at King Edward VI…	177	337	MAY	COCA:2012:MAG	MAG	13	People	vb	NA	NA	ep	pos	ws	ep	disint	NA	pres	sim	presvb	NA	n	act	st	LAST	n	3s	n	n	n	sub.relcl	NA	NA	pos	NA	n	n	n	noef	ass	ass	dir	NA	NA	NA
). Moreover, they may be used to highlight various shortcomings in clinical practice, which, in turn, may aid in the development of standard of care (43, 44). In this way, evidence-based rationale for treatments can be implemented. Furthermore, insurance and health care agencies can recognize improved cost-benefit options for the purposes of disease prevention (43-45). Despite)%>this, the underly…	178	17	CAN	COCA:2015:ACAD	ACAD	14	PlasticSurgery	vb	NA	NA	root	pos	ns	op	circ	n	pres	sim	presvb	NA	n	act	dyn	RECOGNIZE	n	3p	y	y	y	maincl	NA	decl	pos	NA	n	n	n	noef	ass	ass	dir	NA	NA	NA
). Most of these M2-resistant viruses belong to clade 1.1 (32, 33), but they have also been found in other clades, including clade 2.3.4 (34). The oseltamivir-resistant H275Y-mutant virus detected in this study was sensitive to M2 blockers; however, the ease with which viruses can acquire resistance to this class of drugs emphasizes the need for alternative therapeutic options.)%>The NA activity …	179	18	CAN	COCA:2013:ACAD	ACAD	14	EmergingInfectious	vb	NA	NA	root	pos	ns	ab	subjint	n	pres	sim	presvb	NA	n	act	dyn	ACQUIRE	n	3p	y	n	y	sub.relcl	NA	NA	pos	NA	n	n	n	noef	ass	ass	dir	NA	NA	NA
)? PERINO#. what the woman said about him being a cat. KELLY# Yes. Marc, go ahead, quickly. MARC-THIESSEN, -FOX# No. It's just - it's interesting, though, however , that Jeb Bush is the candidate who said, '' Donald Trump, you ca n't insult your way to the presidency. '' KELLY# Yeah. THIESSEN# And today. KELLY#. if you ca n't beat them, join them. THIESSEN#. but today he said, Donald trump is a l…	180	19	CAN	COCA:2016:SPOK	SPOK	14	Fox: Kelly File	neg.vb	NA	NA	root	pos	ns	perm	disint	n	pres	sim	presvb	NA	n	act	dyn	INSULT	n	2s	y	y	n	maincl	NA	decl	notc	negmod	n	n	n	noef	ass	ass	dir	NA	NA	NA
* Occupation: Choreographer, sales associate, aspiring actress * Political affiliation: Democrat * On what her generation will be known for: " Same-sex marriage. I'm so excited about it. Now people do n't have to be so afraid... They're making a huge deal about something that should just be accepted. If you don't like gay marriage, don't do)%>it! Stop concerning yourself with it! No one's telling…	181	355	SHOULD	COCA:2014:NEWS	NEWS	14	Pittsburgh	adv	NA	NA	root	nec	ws	gsn	circ	NA	pres	sim	presvb	NA	n	pas	st	ACCEPT	n	3s	n	n	n	sub.relcl	NA	NA	pos	NA	n	n	n	noef	ass	ass	dir	weak	m	JUST
, " against a tumultuous background of rising medical costs, a rapidly growing geriatric population, increasing employment of high-technology treatments, fears about rationing, and confusion over healthcare reform. Do these concerns invalidate the arguments of those who want to recognize the concept that certain medical treatments are futile and physicians ought not attempt them? # In the United …	182	492	OUGHT TO	COCA:1994:ACAD	ACAD	14	Generations	neg.vb	n	NA	root	nec	ns	subjextn	disint	n	pres	sim	presvb	NA	n	act	dyn	ATTEMPT	n	3p	y	y	y	maincl	NA	decl	not	negprop	n	n	n	noef	ass	ass	indir	NA	NA	NA
, " as it were. # As reported in the British media: # Visiting a university in Manchester where a rocket was being built in 2001, the duke met 13-year-old schoolboy Andrew Adams, who said he wished he could ride the rocket into space. Replied Philip, '' You'll have to lose weight if you want to go in that. '' # Chatting with aborigine leaders at a cultural park in Australia the next year, the duk…	183	184	HAVE TO	COCA:2007:NEWS	NEWS	14	WashPost	vb	n	fut	root	nec	ns	subjextn	cond	n	fut	sim	presvb	NA	n	act	dyn	LOSE	n	2s	y	y	n	maincl	NA	decl	pos	NA	n	n	n	noef	ass	ass	dir	NA	NA	NA
, " before the Years of Living Dangerously begin. " Each day, Ban reads the reports on the carnage in Syria, now at more than 200,000 dead, and warily eyes the destabilizing war in Eastern Europe less than 1,000 miles away. He has to wonder -- if the United Nations can not lead decisively, if it can not shore up its credibility around the world)%>, will it be able to lead when we need it most? Wi…	184	20	CAN	COCA:2015:MAG	MAG	13	NewRepublic	neg.vb	NA	NA	root	pos	ns	ab	subjint	n	pres	sim	presvb	NA	n	act	dyn	LEAD	n	3s	y	y	n	sub.advcl	IF	NA	not	negmod	n	n	y	noef	dir	dir.ireq	dir	NA	e	DECISIVELY
, " Lakin said. " Nothing of the sequestration before has affected us as of yet. " Tom Lasser, a retired commander of the Los Alamitos Army airfield at the base who still works part time there doing public outreach, said this month that it is too early to tell what might happen with the final budget. '' The legislation is still moving around, so)%>anything can happen, " Lasser said. kablazalbregi…	185	356	MIGHT	COCA:2014:NEWS	NEWS	14	OrangeCR	vb	NA	NA	ep	pos	ws	ep	disint	NA	pres	sim	presvb	NA	n	act	dyn	HAPPEN	n	3s	n	n	n	sub.nomcl	TELL	NA	pos	NA	n	n	n	noef	ass	ass	dir	NA	NA	NA
, " No conflicts of interest whatsoever were identified in the review, and absolutely no acts of nepotism occurred between Dr. Chin and her husband, MD Anderson President Ron DePinho. " -- # But that's not the whole story. As Todd Ackerman and I report -- in today's Chronicle there may indeed have been some conflicts of interest. # We've been covering this story)%>for more than a month now and wh…	187	146	MAY	COCA:2012:NEWS	NEWS	14	Houston	adv	NA	NA	ep	pos	ws	ep	disint	NA	pres	ant	pfvbnc	ant	n	act	st	BE	y	3p	n	n	n	maincl	NA	decl	pos	NA	n	n	n	noef	ass	ass	dir	NA	m	INDEED
, " or at least understand the human impulses that made it, as he made them. (" He's lonely -- but he's funny, " an angel says in the movie.) After all , it takes Catholic theology absolutely literally, and in such detail that non-Catholics may need to be issued Catechisms on their way into the theater (not everybody knows what a plenary indulgence is). Sure, it contains a lot of four-letter word…	188	102	NEED TO	COCA:1999:NEWS	NEWS	14	Chicago	vb	n	toinf	root	nec	ws	gsn	circ	NA	pres	sim	presvb	NA	n	pas	dyn	ISSUE	n	3p	y	n	y	sub.advcl	IN SUCH DETAIL THAT	NA	pos	NA	n	n	n	noef	ass	ass	dir	NA	NA	NA
, " Please tell them that I would be very willing to hear from them. But I do n't know how to evaluate opinions that are offered anonymously. " Then, too, when the criticism is anonymous , you don't know to whom you need to apologize or with whom you need to be reconciled. I have learned that there are times when I am better able to receive criticism (say, between 1:00 and 1:30 on Tuesday afterno…	189	107	NEED TO	COCA:2009:MAG	MAG	13	ChristCentury	vb	n	pres	root	nec	ws	gsn	circ	NA	pres	sim	presvb	NA	n	pas	dyn	RECONCILE	n	2s	y	n	y	sub.nomcl	KNOW	NA	pos	NA	n	n	n	noef	ass	ass	dir	NA	NA	NA
, " she said. " For us, that's like having five interviews and never getting a job. How many people can handle that kind of rejection? // " But that's the business, you know? If you're not tough and you can't take it, you need to get out. '' // Opening night didn't start with such harsh life lessons on the horizon. Jesse spent the day with Josiah, playing with the tiny Shih Tzu dog his parents ha…	190	190	NEED TO	COCA:2008:NEWS	NEWS	14	Denver	vb	n	pres	root	nec	ns	subjextn	circ	n	pres	sim	presvb	NA	n	act	dyn	GET OUT	n	2s	y	y	y	maincl	NA	decl	pos	NA	n	n	n	noef	ass	ass	dir	NA	NA	NA
, " Soon-Shiong told the crowd gathered to honor him May 16 for his contributions to UCI. " There is an opportunity for us to really make a difference... And, most importantly, create collaboration. " Dunn said they are in '' wait mode. '' '' A number of factors need to come together to make this a possibility, '' says Dunn. '' We are hopeful that the future will bring the creation of a judicial …	191	126	NEED TO	COCA:2014:NEWS	NEWS	14	OrangeCR	vb	n	pres	root	nec	ws	gsn	cond	NA	pres	sim	presvb	NA	n	act	dyn	COME TOGETHER	n	3p	n	n	n	maincl	NA	decl	pos	NA	n	n	n	noef	ass	ass	dir	NA	NA	NA
, " the policeman said. " You've said all along that they had to make up the difference. We have to have the extra genes that make us human. " That's true, " I agreed, wondering how simple I could make it, and how simple I'd need to make it before he could understand. '' And until today I'd assumed , just as you had, that the extra genes would have to be transplanted, or that they'd have to synth…	192	8	NEED TO	COCA:2000:FIC	FIC	13	Analog	vb	n	pastfut	root	nec	ns	subjextn	cond	NA	pastsub	sim	presvb	NA	n	act	dyn	MAKE	n	1s	y	y	n	maincl	NA	decl	pos	NA	n	n	n	noef	ass	ass	dir	NA	NA	NA
, " we'd be happy to have you come with us. " # The kind remark nearly brought back Lucy's tears, but she stifled them ruthlessly. When had she become such a watering pot? # Steadying her shoulders, she pulled away. '' I can't. I need to keep busy, and Mrs. Harris could use the help. I'll be fine. Really, I will. " # " We'll be back in three weeks, " Papa said, " but if you need us sooner, just s…	193	33	NEED TO	COCA:2009:FIC	FIC	13	Bk:DontBargainWith	vb	n	pres	root	nec	ns	subjextn	circ	n	pres	sim	presvb	NA	n	act	dyn	KEEP	n	1s	y	y	n	maincl	NA	decl	pos	NA	n	n	n	noef	ass	ass	dir	NA	NA	NA
, $7 each 6 metal fence U-posts, 6 feet tall (with holes and clips), $7 each 18 nylon heavy-duty cable ties (3 per post), about $15 for two 15-packs # First, drive the posts into the ground in two parallel lines of three posts each. There should be 42 inches of space on either side of each row's middle post,)%>and 42 inches of space between each row. Use the cable ties to attach the concrete reme…	194	495	SHOULD	COCA:2015:MAG	MAG	13	MotherEarth	vb	NA	NA	root	nec	ws	gsn	cond	NA	pres	sim	presvb	NA	n	act	st	BE	n	3p	n	n	n	maincl	NA	decl	pos	NA	n	n	n	noef	ass	ass	dir	NA	NA	NA
, & Rodriguez, 2004; Lynch & Hanson, 2011). Thus, cultural differences could have profound impacts on using eye contact and language initiation as diagnostic markers for Autism Spectrum Disorders. Given the results of our language proficiency testing, we decided to conduct the ADOS in Spanish. This may have produced more social interaction, eye contact, and spontaneous language than the same)%>as…	195	24	MAY	COCA:2013:ACAD	ACAD	14	EducTreatmenChildren	vb	NA	NA	ep	pos	ws	ep	disint	NA	pres	ant	pfvbnc	ant	n	act	dyn	PRODUCE	n	3s	n	n	n	maincl	NA	decl	pos	NA	n	n	n	noef	ass	ass	dir	NA	NA	NA
, **27;1522;TOOLONG set of strength training exercises, visit Dr. Nelson's Web site, www.strongwomen.com. Or order Prevention Fitness Editor Michele Stanten's video, Prevention's Fat to Firm in 20 Minutes!, by calling (800) 325-3186. # Cross-train. If you're healthy, you should be able to work your way up to fairly intense aerobic activities, such as spinning,and high-impact ones, such as jogging…	196	134	BE ABLE TO	COCA:2000:MAG	MAG	13	Prevention	vb	NA	inf	root	pos	ns	ab	subjint	n	pres	sim	presvb	NA	n	act	dyn	WORK	n	2s	y	y	n	maincl	NA	decl	pos	NA	n	n	n	noef	ass	ass	dir	NA	NA	NA
, 111 minutes) Contains profanity and brief sexuality. Area theaters. # -- A.H. # ** 1/2 DIARY OF A WIMPY KID # In Thor Freudenthal's intermittently inspired film, Greg Heffley -- the 11-year-old known to millions of young Jeff Kinney readers as a glum-faced stick figure with a cowlick -- may have been transformed into a live boy played by Zachary Gordon, but his trials)%>and tribulations remain …	197	279	MAY	COCA:2010:NEWS	NEWS	14	WashPost	vb	NA	NA	ep	pos	ws	ep	disint	NA	pres	ant	pfvbnc	ant	n	pas	dyn	TRANSFORM	n	3s	y	n	n	maincl	NA	decl	pos	NA	n	n	n	str	ass	ass	dir	NA	NA	NA
, 2003, 2004). # Survey measures of bullying typically rely on anonymous student self-reports of victimization that are not confirmed by others. How can school authorities be certain that the levels of bullying reported by their students are accurate? # In order for students to self-report being victims, they have to understand the criteria for bullying, recognize bullying events, and distinguish…	198	73	HAVE TO	COCA:2011:ACAD	ACAD	14	SchoolCounsel	vb	n	pres	root	nec	ns	subjextn	cond	n	pres	sim	presvb	NA	n	act	st	UNDERSTAND	n	3p	y	n	y	maincl	NA	decl	pos	NA	n	n	n	noef	ass	ass	dir	NA	NA	NA
, 2007). Although new literacy instruction is not often present in classrooms (Stolle, 2008), students' abilities to use new literacy skills will be included in high-stakes assessments, including performance-based components within PARCC assessment system in the near future. More importantly, teachers believe that digital literacy should be incorporated into every school's curriculum and that stu…	199	227	SHOULD	COCA:2014:ACAD	ACAD	14	ReadingTeacher	vb	NA	NA	root	nec	ws	gsn	circ	NA	pres	sim	presvb	NA	n	pas	dyn	INCORPORATE	n	3s	n	n	n	sub.nomcl	BELIEVE	NA	pos	NA	n	n	n	noef	ass	ass	dir	NA	NA	NA
, 26, who is African American and lives in Austin, the city's deadliest neighborhood, has had enough. This fall, she plans to leave for good with her 4-year-old daughter, McKenzie. She is now too frightened to walk her daughter to the nearby park. '' A 4-year-old should not know how to drop when somebody's shooting, '' she said. If)%>their suit is successful, Bosley and Nance-Holt concede that it…	200	252	SHOULD	COCA:2015:NEWS	NEWS	14	WashPost	neg.vb	NA	NA	root	nec	ws	gsn	disint	NA	pres	sim	presvb	NA	n	act	st	KNOW	n	3s	y	n	y	maincl	NA	decl	not	negprop	n	n	n	noef	ass	ass	dir	NA	NA	NA
, 307 yards; $400 # RORY SAYS: " I put this driver in the bag last October. It has a bigger head, a longer face and spins a little bit more than my previous one the original Covert Tour, which makes this more playable and more controllable, so I can hit the shots I want to hit. It's been a really good addition)%>. " # IRONS # Nike VR Pro Blade 3-9, # Project X 7.0 steel shaft, X flex, $600/steel …	201	21	CAN	COCA:2014:MAG	MAG	13	GolfMag	vb	NA	NA	root	pos	ns	op	circ	n	pres	sim	presvb	NA	n	act	dyn	HIT	n	1s	y	y	n	sub.advcl	SO THAT	NA	pos	NA	n	n	n	noef	ass	ass	dir	NA	NA	NA
, 4 percent chance of prostitution, 50 percent chance of mental instability, 20 percent chance of obnoxiousness, a 4 percent chance of violent behavior. I was probably none of these things, at least not at first, but to all the passing drivers and everyone else in this country I could be anything, so they just slowed, had a look, made a guess)%>, kept driving. # Womenthey'd squint quick, make a w…	202	219	COULD	COCA:2014:FIC	FIC	13	Bk:NobodyIsEverMissing	vb	NA	NA	root	pos	ws	gsp	disint	NA	past	sim	presvb	NA	n	act	st	BE	n	1s	y	n	n	maincl	NA	decl	pos	NA	n	n	n	noef	ass	ass	dir	NA	NA	NA
, a bridge that began some where but ended in the middle of the air, unconnected to anything. Some people would think the view so high up would be scenic, but really, the world from such a vantage point would look very small and forgettable, like a toy a child might throw away. Jacob was explaining about how to build a lightweight structure to support)%>an incredible amount o f weight when Maribe…	203	478	MIGHT	COCA:2014:FIC	FIC	13	MassachRev	vb	NA	NA	root	pos	ws	gsp	circ	NA	pres	sim	presvb	NA	n	act	dyn	THROW AWAY	n	3s	y	y	y	sub.relcl	NA	NA	pos	NA	n	n	n	noef	ass	ass	dir	NA	NA	NA
, a fierce raising of the hackle feathers, and an outraged Skraaaawk! # After you've determined a hen is broody, remove her from the egg-laying nest. Many beginners try to leave the broody hen in the regular egg nest she has chosen to hatch her chicks. But the hen may leave the nest to relieve herself and then return to the adjacent nest box by)%>mistake, leaving her incubating eggs to chill and …	204	221	MAY	COCA:2012:MAG	MAG	13	MotherEarth	vb	NA	NA	ep	pos	ws	ep	disint	NA	pres	sim	presvb	NA	n	act	dyn	LEAVE	n	3s	y	y	y	maincl	NA	decl	pos	NA	n	n	n	noef	ass	ass	dir	NA	NA	NA
, a military expert. You got to have some people on the ground. You ca n't do this just with airpower. And so we've got to have special ops forces or we've got to have some people who can advise this ground force if it's the Iraqi army who can collect intelligence, who can guide air strikes, and if they're not going)%>to be Americans, who are they going to be? We're going to have to have some peo…	205	22	CAN	COCA:2014:SPOK	SPOK	14	NBC	vb	NA	NA	root	pos	ns	ab	subjint	n	pres	sim	presvb	NA	n	act	dyn	COLLECT	n	3s	y	y	n	sub.relcl	NA	NA	pos	NA	n	n	y	noef	ass	ass	dir	NA	NA	NA
, A Shorte Declaration of the Mistery of Iniquity (s.l., s.n., 1612). # (n34) John Murton, Persecution for Religion Judg'd and Condemn'd... Proving by the Law of God and of the Land, and by King James his many Testimonies, that No Man Ought to be Persecuted for his Religion, Printed in the years 1615 and 1620 ( repr. s.l., s.n., 1662). # (n35) John Murton or Thomas Helwys, Obiections: Answered by…	206	503	OUGHT TO	COCA:2010:ACAD	ACAD	14	ChurchHistory	vb	n	NA	root	nec	ws	gsn	disint	NA	pres	sim	presvb	NA	n	pas	dyn	PERSECUTE	n	3s	y	n	n	maincl	NA	decl	n.subj	NA	n	n	n	noef	ass	ass	dir	NA	NA	NA
, a very few of them passed through even more ancient beds of diamonds formed 3 billion years ago, carrying the crystallized carbon stones to the surface. # The Diavik and BHP mines are centered over several of those conical pipes. Both operations have now strip-mined in a circle so deep they must move to underground tunneling to follow the pipes further. # Most of the diamonds)%>produced here wi…	207	269	MUST	COCA:2007:NEWS	NEWS	14	WashPost	vb	NA	NA	root	nec	ns	subjextn	circ	n	pres	sim	presvb	NA	n	act	dyn	MOVE	n	3p	y	y	n	sub.advcl	SO ADJ THAT	NA	pos	NA	n	n	n	noef	ass	ass	dir	NA	NA	NA
, about politics, about the best mopping techniques for apprentices assigned to clean Temple corridors. Again his lightsaber swung invitingly just within Valin's reach. # But, no. He and Jysella needed to know much more than they did now if they were to stage a successful escape. They needed to be rested, informed, and somewhere other than deep in the enemy-occupied Jedi Temple before they struck…	208	325	NEED TO	COCA:2011:FIC	FIC	13	Bk:Conviction	vb	n	pret	root	nec	ws	gsn	cond	NA	past	sim	presvb	NA	n	pas	dyn	REST	n	3p	y	n	n	maincl	NA	decl	pos	NA	n	n	n	noef	ass	ass	dir	NA	NA	NA
, Alex Blumberg never intended to ditch it all to launch a business. He was a producer for public radio program This American Life and worked on the popular business podcast/blog Planet Money. He was winning awards. Getting raises. Life was great. But all along Blumberg had an idea he couldn't shake: to produce narrative journalism podcasts, in serial formto be, as)%>he puts it, the HBO of podcas…	209	421	COULD	COCA:2015:MAG	MAG	13	Money	neg.vb	NA	NA	root	pos	ns	ab	subjint	n	past	sim	presvb	NA	n	act	dyn	SHAKE	n	3s	y	y	n	sub.relcl	NA	NA	notc	negmod	n	n	n	noef	ass	ass	dir	NA	NA	NA
, also known as the Theory of Emotional Development. According to Dabrowski (1964), Level V is characterized by harmonious autonomy and is manifested in empathy and internal values. Behavior is based on an individualized and chosen hierarchy of personal values, and individuals develop their own vision of how life ought to be. They express their talents energetically, through action, art, and soci…	210	444	OUGHT TO	COCA:2008:ACAD	ACAD	14	RoeperReview	vb	n	NA	root	nec	ws	gsn	circ	NA	pres	sim	presvb	NA	n	act	st	BE	n	3s	n	n	y	sub.nomcl	THE VISION OF	NA	pos	NA	n	n	n	noef	ass	ass	dir	NA	NA	NA
, American School Counselor Association ASCA, 2003; Carey &; Dimmitt, 2004; Dahir &; Stone, 2003; Fitch &; Marshall, 2004; Gysbers, 2003; House &; Hayes, 2002; Lapan, 2005 ; Paisley &; Hayes, 2003). As a result, professional school counselors must actively partner with other educators to advance the academic growth and learning of all students)%>. # Undoubtedly, improving middle school education …	211	78	MUST	COCA:2005:ACAD	ACAD	14	SchoolCounsel	adv	NA	NA	root	nec	ns	subjextn	circ	n	pres	sim	presvb	NA	n	act	dyn	PARTNER	n	3p	y	y	y	maincl	NA	decl	pos	NA	n	n	n	noef	ass	ass	dir	NA	m	ACTIVELY
, an analyst and deputy director of the Greater New Orleans Community Data Center, which has monitored progress every year since the storm and puts together an oft-cited annual summary. " We are not going to put up with corruption, not going to put up with bad schools, not going to have to go to the emergency room for health care. It really gave people the determination to change things we had be…	212	120	HAVE TO	COCA:2010:NEWS	NEWS	14	Houston	vb	n	inf	root	nec	ns	subjextn	circ	n	pres	sim	presvb	NA	n	act	dyn	GO	n	1p	y	y	y	maincl	NA	decl	pos	NA	n	n	n	noef	ass	ass	dir	NA	NA	NA
, an embolism will. She knows the score, and I do n't think it bothers her much. You know, Harry, a dying person wants to die the same way a sleepy person wants to sleep . # '' Prost, '' she concluded, raising her coffee cup. '' May you get a lively book out of our dysfunctional family. It's about time)%>the Crosses were good for something besides turning a dishonest dollar. " # He raised his cup…	213	197	MAY	COCA:2011:FIC	FIC	13	FantasySciFi	subjinv	NA	NA	root	pos	ns	op	circ	n	pres	sim	presvb	NA	n	act	dyn	GET	n	2s	y	n	n	maincl	NA	decl	pos	NA	n	n	n	str	exp	exp	dir	NA	NA	NA
, an influential and polarizing summer league power broker who boasts of training Wiggins in middle school, sat down with a 12-year-old and his dad. " Here is the Andrew Wiggins blueprint, " Russell told the spindly adolescent, Shakur Daniel, and his father before explaining in exhaustive detail how Daniel could follow in the footsteps of a teenager who was virtually unrivaled in athleticism and …	214	401	COULD	COCA:2014:NEWS	NEWS	14	USAToday	vb	NA	NA	root	pos	ns	op	circ	n	pastsub	sim	presvb	NA	n	act	dyn	FOLLOW	n	3s	y	y	n	sub.nomcl	EXPLAIN	NA	pos	NA	n	n	n	noef	ass	ass	dir	NA	NA	NA
, and 11, in binary notation); four qubits can represent 16 values; eight qubits 256 values; and so on. Even a relatively small quantum computer, one that had a few tens of thousands of qubits, could consider so many different values at once that it would be able to break all known codes commonly used for secure Internet communication. Quantum computers mightalso be used for faster database searc…	215	457	BE ABLE TO	COCA:2008:MAG	MAG	13	TechReview	vb	NA	pastfut	root	pos	ns	ab	subjint	n	fut	sim	presvb	NA	n	act	dyn	BREAK	n	3s	y	y	y	sub.advcl	SO MANY NP THAT	NA	pos	NA	n	n	n	noef	ass	ass	dir	NA	NA	NA
, and comparisons between patients in each group should be interpreted with care. Additionally, co-existing pulmonary disease among these patients might be underreported. Although clinicians are likely to try to rule out CNS infection in patients with pulmonary cryptococcosis, such as those in the Pacific Northwest, patients with CNS cryptococcosis might be less likely to have pulmonary sites cul…	216	211	MIGHT	COCA:2013:ACAD	ACAD	14	EmergingInfectious	vb	NA	NA	ep	pos	ws	ep	disint	NA	pres	sim	presvb	NA	n	act	st	BE	n	3p	y	n	y	maincl	NA	decl	pos	NA	n	n	n	noef	ass	ass	dir	NA	NA	NA
, and consequently, the rest of the economy. " Individual Chinese make up more than 99 percent of China's stock investors and account for roughly 10 percent of daily trading volume, " the Monitor reported Wednesday . Now, experts are warning that the period of reprieve purchased by government intervention may have longstanding repercussions. '' The authorities are capable of slowing the selling a…	217	339	MAY	COCA:2015:NEWS	NEWS	14	CSMonitor	vb	NA	NA	ep	pos	ws	ep	disint	NA	pres	sim	presvb	NA	n	act	st	HAVE	n	3s	n	n	n	sub.nomcl	WARN	NA	pos	NA	n	n	n	noef	ass	ass	dir	NA	NA	NA
, and discourse-level comprehension have not yet been reported. Similarly, a limited set of narrative analyses have been explored in the existing literature. Notably absent from prior work is an examination of grammatical error rates using measures such as omitted words, omitted bound morphemes, and word-level errors. Grammatical errors may be particularly sensitive indicators of a language disor…	218	444	MAY	COCA:2014:ACAD	ACAD	14	LangSpeechHearing	vb	NA	NA	ep	pos	ws	ep	disint	NA	pres	sim	presvb	NA	n	act	st	BE	n	3p	n	n	y	maincl	NA	decl	pos	NA	n	n	n	noef	ass	ass	dir	NA	ie	PARTICULARLY
, and ground. If you live in an older home that does n't have grounded wiring (and three-prong outlets), you wo n't be able to use this type of power-line adapter. # Even if your home has grounded wiring, you should be aware that the quality of your electrical circuitry can significantly impact the performance of power-line networking devices. In addition to running tests in)%>the same location (…	219	23	CAN	COCA:2015:MAG	MAG	13	PCWorld	adv	NA	NA	root	pos	ws	gsp	circ	NA	pres	sim	presvb	NA	n	act	dyn	IMPACT	n	3s	n	n	n	sub.nomcl	BE AWARE	NA	pos	NA	n	n	n	noef	ass	ass	dir	NA	m	SIGNIFICANTLY
, and Ida was consumed. // Silence, and then a voice from the abyss. " I saw him! " // The girls nearly threw themselves down the stairs, exhaling the common breath we all held . For the briefest moment, I doubted my own disbelief, wondering if there might be something to this voodoo falderol that Phoebe had roped us all into. //)%>I made my way to the front of the crowd, cupped my hand to my mou…	220	412	MIGHT	COCA:2008:FIC	FIC	13	Bk:EndlessSight	vb	NA	NA	ep	pos	ws	ep	disint	NA	pres	sim	presvb	NA	n	act	st	BE	y	3s	n	n	n	sub.nomcl	WONDER	NA	pos	NA	n	n	n	noef	ass	ass	dir	NA	NA	NA
, and in another few miles looks over his shoulder. " You are Jew, no? " he asks in English. She hesitates. " Yes. " He taps the dashboard. " I am Christian . The government, they kill my pigs, so I get this. They can not kill a car, no? '' Many of the Christians in Egypt were)%>pig farmers until the govern ment slaughtered all the pigs to pacify Muslims worried about swine flu. R' s mother under…	221	24	CAN	COCA:2015:FIC	FIC	13	KenyonRev	neg.vb	NA	NA	root	pos	ns	op	circ	n	pres	sim	presvb	NA	n	act	dyn	KILL	n	3p	y	y	n	maincl	NA	decl	not	negmod	n	n	n	noef	exp	exp	indir	NA	NA	NA
, and it was a way of, I think, keeping the Egyptian military passive and quiet in various ways. It was the bulwark of the Mubarak regime, and we see now today that the Egyptian military is governing the country, and one of the things we, I think, may be able to use to our advantage is the fact that we do have some)%>extensive connections and personal contacts with some of the people who are now …	222	330	MAY	COCA:2011:SPOK	SPOK	14	NPR_TalkNation	vb	NA	NA	ep	pos	ws	ep	disint	NA	pres	sim	presvb	NA	n	act	st	BE ABLE TO	n	1p	y	n	n	sub.relcl	NA	NA	pos	NA	n	n	n	noef	ass	ass	dir	NA	NA	NA
, and it's time to stop and pause a minute. There has been this wild cascade and flood of information, most of it unsubstantiated and unsupported at this point. That -- I believe we need to stop and assess what's going on. I think one of the questions that ought to be on the table here today is Ken Starr and what is going on with that investigation. I think a lot of people out in the country are …	223	291	OUGHT TO	COCA:1998:SPOK	SPOK	14	Fox_Sunday	vb	n	NA	root	nec	ws	gsn	disint	NA	pres	sim	presvb	NA	n	act	st	BE	n	3s	n	n	n	sub.relcl	NA	NA	pos	NA	n	n	n	noef	ass	ass	dir	NA	e	HERE+TODAY
, and joint finances have to be rationalized. It's time to face the music. Cancer June 22-July 23 Look to a year of enriched intimacy and lucky financial dealings, but do n't fret if these qualities seem temporarily elusive. Though others seem to be calling the shots now, they may actually be very constructive. Important truths are revealed. If you're craving an)%>exotic escape, enjoy it, but rem…	224	381	MAY	COCA:2009:MAG	MAG	13	HarpersBazaar	adv	NA	NA	ep	pos	ws	ep	disint	NA	pres	sim	presvb	NA	n	act	st	BE	n	3p	y	n	n	maincl	NA	decl	pos	NA	n	n	n	noef	ass	ass	dir	NA	m	ACTUALLY
, and my husband thinks I'm poisoning him. I'm like it's healthy, it has antioxidants. Right, it has antioxidants, chocolate and Hot Tamales, I'm good. SAMANTHA-PONDER# Hot Tamales, I'm with you. I eat Sour Patch Kids once a day. That should be a food group, my Sour Patch Kid people. I like sour.)%>We've got this figured out. Sweet is the chocolate, cinnamon is the fire and Sour Patch is the sour…	225	447	SHOULD	COCA:2015:SPOK	SPOK	14	ABC	vb	NA	NA	root	nec	ws	gsn	disint	NA	pres	sim	presvb	NA	n	act	st	BE	n	3s	n	n	n	maincl	NA	decl	pos	NA	n	n	n	noef	exp	exp	indir	NA	NA	NA
, and new, unforeseen forces may emerge to play a role. The greater understanding of driving forces of land change continues to be needed as we modify the world in which we live. # NOTES 1. Four of these dates coincide with two large datasets that the Land Cover Trends project could access at no cost during the time of image interpretation. These were the North)%>American Landscape Characterizati…	226	96	COULD	COCA:2012:ACAD	ACAD	14	GeographRev	vb	NA	NA	root	pos	ns	perm	rul	n	past	sim	presvb	NA	n	act	st	ACCESS	n	3s	y	y	n	sub.relcl	NA	NA	pos	NA	n	n	n	noef	ass	ass	dir	NA	NA	NA
, and put them in packages, he said. # Packaging is largely the domain of the mechanical engineer, according to Monk. In MEMS, the mechanical engineers are working with silicon, where the system could be affected by the stress of the package, he said. The mechanical engineer must design the package and keep in mind the package's effect on the device itself)%>. # In the bio-MEMS area, packaging in…	227	487	MUST	COCA:2003:ACAD	ACAD	14	MechanicalEng	vb	NA	NA	root	nec	ns	subjextn	rul	n	pres	sim	presvb	NA	n	act	dyn	DESIGN	n	3s	y	y	y	maincl	NA	decl	pos	NA	n	n	n	noef	ass	ass	dir	NA	NA	NA
, and settled his boy near it, and gone back out into the snow. Perhaps the story spread through our settlements because the father had to tell what he saw, again and again, in order to get rid of it. Perhaps as with all frightful dreams, amaniso, he had to talk about it to destroy its power -- though in this case nothing could stop the dream from being real. The shadows " tracks were the tracks …	228	396	HAVE TO	COCA:2002:FIC	FIC	13	LitCavalcade	vb	n	pret	root	nec	ns	subjextn	cond	n	past	sim	presvb	NA	n	act	dyn	TALK	n	3s	y	y	n	maincl	NA	decl	pos	NA	n	n	n	noef	ass	ass	dir	NA	initial	PERHAPS
, and so when men publically perform such emotions, they take on a (supposedly) feminine quality; the juxtaposition of masculinity and femininity in such songs renders them campy. The camp aesthetic embraces a political critique of social norms, and GALA's performances of such emotional, campy community songs can be read in just this way. Tim Seelig, the current conductor of the)%>San Francisco G…	229	25	CAN	COCA:2015:ACAD	ACAD	14	JournalAmerican	vb	NA	NA	root	pos	ws	gsp	circ	NA	pres	sim	presvb	NA	n	pas	dyn	READ	n	3p	n	n	y	maincl	NA	decl	pos	NA	n	n	n	noef	ass	ass	dir	NA	e	IN JUST THIS WAY
, and then different in two ways. First of all, with tissue for transplantation there is some level of federal oversight, although less than exists with organs. The Food and Drug Administration requires all tissue banks to be registered with them, and they have a set of minimal standards that must be met. And these standards are specifically geared around trying to prevent disease transmission)%>…	230	262	MUST	COCA:2002:SPOK	SPOK	14	NPR_ATC	vb	NA	NA	root	nec	ws	gsn	rul	NA	pres	sim	presvb	NA	n	pas	st	MEET	n	3p	n	n	n	sub.relcl	NA	NA	pos	NA	n	n	n	noef	ass	ass	dir	NA	NA	NA
, and to Russia. Our relationship with South Korea, which is important both as a military and economic partner. And so, you know, it is, it is a problem up in North Korea because its economy has disintegrated. The people are living very poorly. The government is able to only maintain control through oppression and that creates a good deal of instability whichwe need to be vigilant about NOVAK We …	231	381	BE ABLE TO	COCA:2000:SPOK	SPOK	14	CNN_Novak	adv	NA	pres	root	pos	ns	op	circ	n	pres	sim	presvb	NA	n	act	dyn	MAINTAIN	n	3s	y	y	n	maincl	NA	decl	n.adv	NA	n	n	n	noef	ass	ass	dir	NA	m	ONLY
, and west to the Royal Gorge. Five lanes go by Salida and much of the way up Monarch Pass. The future of the canyon is truly threatened - but not by Christo. # Mike Kephart, Denver # After reading the Sunday Perspective column by the Christoph Heinrich, I believe Christo should drape the Denver Art Museum instead of the Arkansas River. This way, Heinrich)%>will be able to admire the " artwork " …	232	492	SHOULD	COCA:2010:NEWS	NEWS	14	Denver	vb	NA	NA	root	nec	ns	subjextn	disint	n	pres	sim	presvb	NA	n	act	dyn	DRAPE	n	3s	y	y	n	sub.nomcl	BELIEVE	NA	pos	NA	n	n	n	noef	ass	ass	dir	NA	NA	NA
, and when he steps to the podium Sunday in Cooperstown, N.Y., there is a feeling among people who plan to be there that anything could come out of his mouth. # " I ca n't wait , '' San Diego Padres general manager Kevin Towers says. '' His whole speech might be Rickey talking on behalf of Rickey. He's going to be interesting,)%>that's for sure, and he wo n't be humble. But that's what made Ricke…	233	224	MIGHT	COCA:2009:NEWS	NEWS	14	USAToday	vb	NA	NA	ep	pos	ws	ep	disint	NA	pres	sim	presvb	NA	n	act	st	BE	n	3s	n	n	n	maincl	NA	decl	pos	NA	n	n	n	noef	exp	exp	indir	NA	NA	NA
, and you can collect five samples or more in 10 minutes. " Breath testing is as convenient and painless as medical tests come, even for the most vulnerable newborn or the frailest centenarian. The patient does n't even have to be conscious. # For the idea to work, researchers have to mine breath samples to find airborne nuggets of disease, then build machines that detect those molecules with the…	234	240	HAVE TO	COCA:2013:MAG	MAG	13	ScienceNews	vb	n	pres	root	nec	ns	subjextn	cond	n	pres	sim	presvb	NA	n	act	dyn	MINE	n	3p	y	y	y	maincl	NA	decl	pos	NA	n	n	n	noef	ass	ass	dir	NA	NA	NA
, and, ultimately, cultural matters. # Second, the United States exercised leverage through international institutions and arrangements, initially through a frame of security treaties: the North Atlantic Treaty Organization for European allies, bilateral agreements with Japan and South Korea. Acting with allies, the United States was able to redistribute the financial, military, and political bur…	235	10	BE ABLE TO	COCA:2003:MAG	MAG	13	WashMonth	vb	NA	pret	root	pos	ns	op	circ	y	past	sim	presvb	NA	n	act	dyn	REDISTRIBUTE	n	3s	y	y	n	maincl	NA	decl	pos	NA	n	n	n	noef	ass	ass	dir	NA	NA	NA
, another consulting tripthird one this fall. (He's really trying, Mom.) Anyway, Dad traveling means I always have to be home for Marty. But tonight he was invited to a sleepover, leaving me free until the morning. Dad and I made a deal: I could go to the party as long as I didn't get drunk (ha-ha,)%>he knows I've never been drunk) or high (ha-ha... oh shit) and was willing to pick him up from th…	236	268	COULD	COCA:2015:FIC	FIC	13	Bk:Canary	vb	NA	NA	root	pos	ns	perm	disint	n	past	pos	presvb	NA	n	act	dyn	GO	n	1s	y	y	n	maincl	NA	decl	pos	NA	n	n	n	noef	ass	ass	dir	NA	NA	NA
, another hit came from the USOC, which he said cut funding by 20 percent via its new pay-for-performance plan. # " I feel every day there's not enough money to go around, " he said by phone from Charlotte. '' All of our athletes deserve more than we're able to give them. Our coaches are underpaid, as is everybody on our staff. " # Jerzy Dziadkowiec, who is based at the U.S. Olympic Training Cent…	237	174	BE ABLE TO	COCA:2004:NEWS	NEWS	14	WashPost	vb	NA	pres	root	pos	ns	op	circ	n	pres	sim	presvb	NA	n	act	dyn	GIVE	n	1p	y	y	n	sub.compcl	NA	NA	pos	NA	n	n	n	noef	exp	exp	indir	NA	NA	NA
, anti-Soviet behavior. So to suggest that maybe the thing to do is stand back goes against a lot of cultural and political habits that are very hard to break. " It also would n't be in Avialesookhrana 's best interest. Already hamstrung by budget cuts, it's an organization that needs to prove its worth to survive, and firefighting heroics-not nuanced discussions of forest health and controlled b…	238	378	NEED TO	COCA:2002:MAG	MAG	13	NatGeog	vb	n	pres	root	nec	ns	subjextn	circ	n	pres	sim	presvb	NA	n	act	dyn	PROVE	n	3s	y	y	n	sub.relcl	NA	NA	pos	NA	n	n	n	noef	ass	ass	dir	NA	NA	NA
, APE standards and competencies should be used to facilitate preservice and inservice physical education teachers' professional development. This is a vital component of such teachers' professional development, because with the implementation of the Adapted Physical Education National Standards (APENS) (Kelly, 1993), physical education teachers must possess a certain degree of competency as it r…	239	367	MUST	COCA:2003:ACAD	ACAD	14	PhysicalEduc	vb	NA	NA	root	nec	ns	subjextn	rul	n	pres	sim	presvb	NA	n	act	st	POSSESS	n	3p	y	n	y	sub.advcl	BECAUSE	NA	pos	NA	n	n	n	noef	ass	ass	dir	NA	NA	NA
, April 10, 2043, had fallen into her consciousness like a cube of glittering ice. She tried it now, but all that came were stupid ideas -- a monkey came in and ate part of the steak, it was like that when we got it from the butcher, Ramona must've hidden a bone in her sweater. Darcy chose the least dumb of these)%>ideas. # " That steak was supposed to be for Megan Kramer, " she said. # Trish sho…	240	249	MUST	COCA:2011:FIC	FIC	13	Bk:AmericaPacifica	vb	NA	NA	ep	nec	ws	ep	disint	NA	pres	ant	pfvbc	ant	n	act	dyn	HIDE	n	3s	y	y	n	maincl	NA	decl	pos	NA	n	n	n	noef	ass	ass	dir	NA	NA	NA
, are already at work in Jordan, Morocco, Qatar, and Bahrain. But few predict that Syria's bedrock strategic position of gaining " every inch " of the Golan in exchange for peace will change anytime soon, or that the son - at least in short term - will be able to compromise. '' Assuming Bashar becomes the leader, he is going to takeit one step at a time, and make sure that everything is in the be…	241	465	BE ABLE TO	COCA:2000:NEWS	NEWS	14	CSMonitor	vb	NA	fut	root	pos	ns	op	circ	n	fut	sim	presvb	NA	n	act	dyn	COMPROMISE	n	3s	y	y	n	sub.nomcl	PREDICT	NA	n.rais	NA	n	n	n	noef	ass	ass	dir	NA	NA	NA
, are not inclined to take such a charitable view. # Denouncing the attack as " a war crime, " Dong A Ilbo, historically a liberal paper that has turned conservative in recent years, said the attack was '' launched at the instigation of Kim Jong-il '' and South Korea '' must single him out as the culprit and hold him accountable. '' # The Seoul)%>government " can hardly afford to negotiate with P…	242	441	MUST	COCA:2010:NEWS	NEWS	14	CSMonitor	vb	NA	NA	root	nec	ns	subjextn	disint	n	pres	sim	presvb	NA	n	act	dyn	SINGLE OUT	n	3s	y	y	n	sub.nomcl	SAY	NA	pos	NA	n	n	n	noef	ass	ass	dir	NA	NA	NA
, are you thinking about running for president again? ROMNEY# No, I'm thinking about the people who I want to see running for president. (LAUGHTER) ROMNEY# And there's quite a group. I mean, we have a very strong field of leaders who could become our nominee, and could stand up for the kind of leadership America wants. Look, a lot of)%>people are looking back to the 1980s and saying, would n't it…	243	447	COULD	COCA:2014:SPOK	SPOK	14	CBS	vb	NA	NA	root	pos	ns	ab	subjint	n	pres	sim	presvb	NA	n	act	dyn	STAND UP	n	3p	y	y	n	sub.relcl	NA	NA	pos	NA	n	n	n	noef	ass	ass	dir	NA	NA	NA
, as a result, far more expensive than they need to be. I suggest that any competent engineers -- not just nuclear -- can show from their own knowledge that these fears are not valid. Let's look at a few of them. Some people speculate that '' nuclear waste '' may pose some sort of unprecedented problem. But in practice, nuclear waste does not)%>figure much in the daily business of operating a nuc…	244	84	MAY	COCA:2009:ACAD	ACAD	14	MechanicalEng	vb	NA	NA	ep	pos	ws	ep	disint	NA	pres	pos	presvb	NA	n	act	dyn	POSE	n	3s	n	n	y	sub.nomcl	SPECULATE	NA	pos	NA	n	n	n	noef	ass	ass	dir	NA	NA	NA
, as I talk about in my book, what I really see, this is a firsthand account in the book. It's kind of the eyewitness, from going to Washington in different fights along the way , always running into the moneyed interest, so that Washington works for anyone who can hire an army of lobbyists and lawyers. It just doesn't work for regular)%>families. So what that's going to have to be about is, they…	245	26	CAN	COCA:2014:SPOK	SPOK	14	CBS	vb	NA	NA	root	pos	ns	ab	subjint	n	pres	sim	presvb	NA	n	act	dyn	HIRE	n	3s	y	y	y	sub.relcl	NA	NA	pos	NA	n	n	n	noef	ass	ass	dir	NA	NA	NA
, as Russia flexes its muscles anew. BARACK-OBAMA: The days of empire and spheres of influence are over. Bigger nations must not be allowed to bully the small or impose their will at the barrel of a gun or with masked men taking over buildings, and the stroke of a pen can never legitimize the theft of a neighbor's land. GWEN-IFILL# In Berlin, German)%>Chancellor Angela Merkel reinforced that mess…	246	27	CAN	COCA:2014:SPOK	SPOK	14	PBS	adv	NA	NA	root	pos	ws	gsp	disint	NA	pres	sim	presvb	NA	n	act	st	LEGITIMIZE	n	3s	n	n	n	maincl	NA	decl	n.adv	NA	n	n	n	str	exp	exp	indir	NA	m	NEVER
, as they have been by the White House, as necessary actions to protect US personnel and to prevent a potential genocide. " This is a potential humanitarian catastrophe, and if we can prevent or mitigate it within a manageable level of risk - which I think we can - then we ought to do it, '' says Charles Dunlap, executive director of the Center on Law, Ethics, and National Security at Duke Univer…	247	295	OUGHT TO	COCA:2014:NEWS	NEWS	14	CSMonitor	vb	n	NA	root	nec	ns	subjextn	disint	n	pres	sim	presvb	NA	n	act	dyn	DO	n	1p	y	y	n	maincl	NA	decl	pos	NA	n	n	n	noef	exp	exp	indir	NA	initial	THEN
, at around 6 months, they often graduate to a " lion walk, " where, for an additional fee, visitors can stroll beside them in the open. By the time the lions are 2 years old, though, they are too dangerous for any such interactions. A few might be introduced to a park's '' wild '' pride, but simple math tells)%>the real story: Very quickly, there are more adult lions than there is room in the pa…	248	327	MIGHT	COCA:2015:MAG	MAG	13	Smithsonian	vb	NA	NA	ep	pos	ws	ep	disint	NA	pres	sim	presvb	NA	n	pas	dyn	INTRODUCE	n	3p	y	n	n	maincl	NA	decl	pos	NA	n	n	n	noef	ass	ass	dir	NA	NA	NA
, avoid bonds maturing in 10 years or more; long-term bonds take the biggest hit when rates rise. In addi tion, try to ladder your bonds; that is, divide your investment equally among one-, three -- and five-year issues. As the short-term bonds mature, you'll be able to reinvest the proceeds in longer-term securities at higher rates. (For more onbonds, see " What kind of bonds are right for me? "…	249	489	BE ABLE TO	COCA:2002:MAG	MAG	13	Money	vb	NA	fut	root	pos	ns	op	circ	n	fut	sim	presvb	NA	n	act	dyn	REINVEST	n	2s	y	y	n	maincl	NA	decl	pos	NA	n	n	n	noef	ass	ass	dir	NA	NA	NA
, Berkeley-esque head swaying. Suddenly, I recognized she was n't dancing to any music. She had some kind of neurological diseaseParkinson's, perhapswhich meant she had little control over her head's wobbling. The movement made her hard to focus on, and I realized my attempts to do so might create the impression I was staring. # '' I'd like a card,)%>too, " she said again, reaching out a tremblin…	250	329	MIGHT	COCA:2012:FIC	FIC	13	Bk:GirlNextDoor [a	vb	NA	NA	ep	pos	ws	ep	disint	NA	pres	sim	presvb	NA	n	act	dyn	CREATE	n	3p	n	n	n	sub.nomcl	REALIZE	NA	pos	NA	n	n	n	noef	ass	ass	dir	NA	NA	NA
, blah, blah, blah. So we were talking about water, the power of water. Well, I tell you what, six inches of flowing water can actually knock a person off their feet. I can't really-- oh, there we go. So that's really what can happen. I mean amazing stuff. Then I mean we are talking about one)%>to two feet of water. That can actually float a vehicle away. And four feet of water moving at about fo…	251	28	CAN	COCA:2015:SPOK	SPOK	14	NBC	vb	NA	NA	root	pos	ws	gsp	circ	NA	pres	sim	presvb	NA	n	act	dyn	HAPPEN	n	3s	n	n	n	sub.nomcl	BE	NA	pos	NA	n	n	n	noef	ass	ass	dir	NA	NA	NA
, bones, roots, textiles, teeth. Pigeonholes, hundreds of them, crammed with resins, waxes, twines. Is it that, like library itself, stockroom is an orderly and teeming universea world of worlds-a finitude with aspirations to allness? Earnshaw hadn't seen him, thought he might be in basement. His hesitation when I held up Kerner and announced my mission)%>. Told him the Wizard had insisted it be …	252	139	MIGHT	COCA:2007:FIC	FIC	13	HarpersMag	vb	NA	NA	ep	pos	ws	ep	disint	NA	pastsub	sim	presvb	NA	n	act	st	BE	n	3s	y	n	n	sub.nomcl	THINK	NA	pos	NA	n	n	n	noef	ass	ass	dir	NA	NA	NA
, but also how that family began to break the bonds of the repetition compulsion by cultivating openness, intimacy, and emotional expressiveness. Knapp concludes with a call for more research " relating family systems... to literary works from every time and culture '' (245). More research needs to be done employing different aspects of family systems as well. Take Sons and Lovers, for example. I…	253	263	NEED TO	COCA:1997:ACAD	ACAD	14	Style	vb	n	pres	root	nec	ws	gsn	circ	NA	pres	sim	presvb	NA	n	pas	dyn	DO	n	3s	n	n	n	maincl	NA	decl	pos	NA	n	n	n	noef	ass	ass	dir	NA	NA	NA
, but also knowledge about the " workings " of written language. He also indicated that the teacher in his study facilitated children's vocabulary development by prereading discussion of new words, providing word cards and helping kindergartners connect new words with their own words. It is understood that young children are able to understand and enjoy such books. Moreover, Duke and Kays (1998)s…	254	254	BE ABLE TO	COCA:2010:ACAD	ACAD	14	Education	vb	NA	pres	root	pos	ns	ab	subjint	n	pres	sim	presvb	NA	n	act	st	UNDERSTAND	n	3p	y	n	y	sub.nomcl	UNDERSTAND	NA	pos	NA	n	n	n	noef	ass	ass	dir	NA	NA	NA
, but depending on those locations, they still can be excellent bargains. " I've heard good and bad, " says Rene Ramirez. " We did open booking once and did n't have a designated stateroom , had a balcony in the rear, but it was fine. Some people may be disappointed if you wait too late, there can be less flexibility. On)%>the other hand, sometimes you can wind up with an amazing trip for half th…	255	498	MAY	COCA:2010:NEWS	NEWS	14	Denver	vb	NA	NA	ep	pos	ws	ep	disint	NA	pres	sim	presvb	NA	n	act	st	BE	n	3p	y	n	n	maincl	NA	decl	pos	NA	n	n	n	noef	ass	ass	dir	NA	NA	NA
, but do n't sacrifice technique for speed. If at any time your form falters (for example, if your butt sags, your back arches, your chest does n't touch the bar, or your arms fail to straighten fully), stop and record the number of reps you were able to complete with good form. TRACK YOUR PROGRESS # Record the number of repetitionsyou performed in the inverted-row test. Then follow this workout …	256	63	BE ABLE TO	COCA:2006:MAG	MAG	13	MensHealth	vb	NA	pret	root	pos	ns	ab	subjint	y	past	sim	presvb	NA	n	act	dyn	COMPLETE	n	2s	y	y	n	sub.relcl	NA	NA	pos	NA	n	n	n	noef	dir	dir.sug	indir	NA	NA	NA
, but Kelly certainly is capable of prevailing in the strategy duel. When it comes to sports, I adamantly resist the notion of fate, destiny, divine intervention, etc. But then Pittsburgh missed a 33-yard field goal attempt in overtime that would have toppled Notre Dame, so... Complacency shouldn't be an issue. But if it is an issue, Notre Dame figures)%>to be hungrier than Alabama. Alabama has a…	257	47	SHOULD	COCA:2013:NEWS	NEWS	14	STLouis	neg.vb	NA	NA	ep	nec	ws	ep	disint	NA	pres	sim	presvb	NA	n	act	st	BE	n	3s	n	n	n	maincl	NA	decl	notc	negprop	n	n	n	noef	ass	ass	dir	NA	NA	NA
, but she tells me she has been dreaming about this day for some time and now it's all happening for her. So what Dr. Romo is doing is an otoplasty, a reduction rhinoplasty, reducing the size of the nose, and a mentoplasty, here on the chin. what might surprise a lot of people is about 42 percent of otoplasties on the ears are)%>done in people under the age of 18. This four-hour operation would n…	258	249	MIGHT	COCA:2012:SPOK	SPOK	14	CNN	vb	NA	NA	ep	pos	ws	ep	disint	NA	pres	sim	presvb	NA	n	act	st	SURPRISE	n	3s	n	n	n	maincl	NA	decl	pos	NA	n	n	n	noef	ass	ass	dir	NA	NA	NA
, but she was n't going to say so. Cindy, too, was wearing a wide-brimmed hat and sunglasses and a terry cover-up, the preferred beachwear for women of a certain age. It drove Mary crazy how Cindy made it look like she kept getting older, when everyone knew she could go back to being pretty little Cindy XA at a moment's notice. She)%>will never know sorrow, Mary thought, she will never know loss.…	259	91	COULD	COCA:2013:FIC	FIC	13	NewEnglandRev	vb	NA	NA	root	pos	ns	ab	subjint	n	pastsub	sim	presvb	NA	n	act	dyn	GO BACK	n	3s	y	y	n	sub.nomcl	KNOW	NA	pos	NA	n	n	n	noef	ass	ass	dir	NA	NA	NA
, but the extenuating circumstances were these: (1) The card arrived at my home address; (2) it was addressed to me, personally, by name; and (3) I did n't recognize the handwriting. I can count on one hand the number of people who might send me a note at home, and I've known each of those folks)%>for decades. This was somebody new. And instinct and experience told me that this was Not A Good Thi…	260	134	MIGHT	COCA:2011:FIC	FIC	13	Bk:Bloodshot	vb	NA	NA	ep	pos	ws	ep	disint	NA	pres	sim	presvb	NA	n	act	dyn	SEND	n	3p	y	y	n	sub.relcl	NA	NA	pos	NA	n	n	n	noef	ass	ass	dir	NA	NA	NA
, but the stadium wreckage itself was dark, an unexpected hole where once 2000-watt lights had blazed out into the night. The sky was overcast, a brooding bank of clouds that hid the stars and seemed to press down on the city. # Sandra dialed her dad's phone for what must have been the tenth time. The call went straight to voice mail, just)%>like every other attempt. Her voice was shaking badly. …	261	123	MUST	COCA:2015:FIC	FIC	13	Bk:Supersymmetry	vb	NA	NA	ep	nec	ws	ep	disint	NA	pres	ant	pfvbnc	ant	n	act	st	BE	n	3s	n	n	n	sub.nomcl	DIAL FOR	NA	pos	NA	n	n	n	noef	ass	ass	dir	NA	NA	NA
, but you can put a scare into him. " " If you had n't come... " I said, but Mr. Bondurant shushed me. " Now, now, Mrs. Spenser. There ai n't no cause to fret over somethin '' that didn't happen. It's me you ought to blame for I did not know what Brownie was up to when I seen him come this way. I chanced to mention it to the Earley boys, and they said it's known that Brownie's not to be left alon…	262	73	OUGHT TO	COCA:1997:FIC	FIC	13	GoodHousekeeping	vb	n	NA	root	nec	ns	subjextn	circ	n	pres	sim	presvb	NA	n	act	dyn	BLAME	n	2s	y	y	n	sub.relcl	NA	NA	pos	NA	n	n	n	noef	ass	ass	dir	NA	NA	NA
, by definition, surrounds the Student with (3) musical peers, goals, and standards that serve to guide and support the student's thinking. " 5 # While retaining Jones's holistic learning and Elliott 's authentic setting, learning must continue to be reinforced to be retained. We must embrace new ways of thinking about planning curricula without losing important strategies from the past)%>, speci…	263	160	MUST	COCA:2009:ACAD	ACAD	14	MusicEduc	vb	NA	NA	root	nec	ns	subjextn	disint	n	pres	sim	presvb	NA	n	act	dyn	EMBRACE	n	1p	y	y	n	maincl	NA	decl	pos	NA	n	n	n	noef	ass	ass	dir	NA	NA	NA
, by providing stability and encouragement through dialogue, multifaceted academic assignments, support, and incremental challenge. During that process, we build a base for connected knowing to flourish. Attachment to Objects # In addition to forming trusting attachments with people such as faculty members, connected knowers need to be able to relate to learning objects and ideas in order to unde…	264	375	BE ABLE TO	COCA:2000:ACAD	ACAD	14	ReVision	vb	NA	toinf	root	pos	ns	ab	subjint	n	pres	sim	presvb	NA	n	act	st	RELATE	n	3p	y	n	y	maincl	NA	decl	pos	NA	n	n	n	noef	ass	ass	dir	NA	NA	NA
, chief executive officer of the Consortium of School Networking, agrees. " While social networking is the current focus, we do n't know what's the next tool. Do we want policy constantly chasing to catch up with the new tool? '' he asks. '' The focus of policy should be behavior, not the technology. '' # Virginia initially tried to push a)%>Missouri-like ban on social networking between teachers…	265	427	SHOULD	COCA:2011:NEWS	NEWS	14	CSMonitor	vb	NA	NA	root	nec	ws	gsn	disint	NA	pres	sim	presvb	NA	n	act	st	BE	n	3s	n	n	n	maincl	NA	decl	pos	NA	n	n	n	noef	ass	ass	dir	NA	NA	NA
, chi-squared analysis demonstrated that staff attitudes were significantly more permissive toward heterosexual and homosexual residents following the educational session. However, when asked to consider their own relatives in LTC, results demonstrated less permissiveness. Researchers hypothesize that while knowledge may be increased through education, attitudes about sexuality among LTC staff ma…	266	150	MAY	COCA:2015:ACAD	ACAD	14	JIssuesNursing	neg.vb	NA	NA	ep	pos	ws	ep	disint	NA	pres	sim	presvb	NA	n	act	dyn	CHANGE	n	3p	n	n	n	sub.nomcl	HYPOTHESIZE	NA	not	negprop	n	n	n	noef	ass	ass	dir	NA	NA	NA
, could also latch onto your throat. Owen Francis, Needham, Mass. KEITH MCCAFFERTY RESPONDS: Leeches, along with grubs and insects, should be cooked if possible before being eaten. It is true that a live leech could adhere to your throat passage, and for this reason they should be killed first or thoroughly chewed. However, I know of no evidence that)%>eating leeches can transmit deadly diseases.…	267	54	SHOULD	COCA:2010:MAG	MAG	13	FieldStream	vb	NA	NA	root	nec	ws	gsn	circ	NA	pres	sim	presvb	NA	n	pas	dyn	KILL	n	3p	y	n	y	maincl	NA	decl	pos	NA	n	n	n	noef	ass	ass	dir	NA	NA	NA
, Dana. DANA BERLINER, INSTITUTE FOR JUSTICE: Good morning, Daria. How are you? D. DOLAN: Good, thanks. K. DOLAN: Hi, Dana. Dana, I am captivated by this . And I'd like to talk to you for three hours, but we ca n't. But I will ask you this -- and I'm on the sideof the homeowners, do n't get me wrong. But if I'm in a depressed city, and we need taxes to get schools, in order to do bridges, in orde…	268	29	CAN	COCA:2005:SPOK	SPOK	14	CNN_Dolans	neg.co	NA	NA	root	pos	ns	op	circ	n	pres	sim	NA	NA	NA	NA	NA	NA	n	1p	y	y	n	maincl	NA	decl	notc	negmod	n	n	n	noef	ass	ass	dir	NA	NA	NA
, do n't you - and Ken always said the same thing. I believe it, he said. And the people who come here, you better believe more of them believe it when they leave than did when they got here. He could understand why the university types and crusading journalists needed to debunk him, or at least write tongue-in-cheek features about cranky Kassarjian and his tourist trap. Water was n't supposed to…	269	356	NEED TO	COCA:2008:FIC	FIC	13	FantasySciFi	vb	n	pret	root	nec	ns	subjextn	circ	n	pastsub	sim	presvb	NA	n	act	dyn	DEBUNK	n	3p	y	y	y	sub.nomcl	UNDERSTAND	NA	pos	NA	n	n	n	noef	ass	ass	dir	NA	NA	NA
, due largely to the election of party moderates, shows the popular will for that approach. " We ca n't afford to be the antiwar party in the war on terrorism, " says Bruce Reed, president of the Democratic Leadership Council, which has strong ties to Clinton. '' We need to make the case on what we would do differently. '' To do that in the general election, Clinton may first have to convert her …	270	139	NEED TO	COCA:2006:MAG	MAG	13	USNWR	vb	n	pres	root	nec	ns	subjextn	disint	n	pres	sim	presvb	NA	n	act	dyn	MAKE	n	1p	y	y	n	maincl	NA	decl	pos	NA	n	n	n	noef	ass	ass	dir	NA	NA	NA
, ears flapping wildly. A poodle. A silver grey poodle. Pedigree. Dog show, must be a dog show. What to do? Alice? Stop the car, try to catch it? Drive on? Somebody's bound to come looking, probably on the way already... might be dead by then, but. Collar? No. But a show specimen)%>, definitely. Owners probably frantic. What to do? Might bite; are n't poodles nippy dogs? Highly strung? Ruth means…	271	176	MIGHT	COCA:2014:FIC	FIC	13	Hecate	vb	NA	NA	ep	pos	ws	ep	disint	NA	pres	pos	presvb	NA	n	act	st	BE	n	NA	NA	NA	n	maincl	NA	decl	pos	NA	n	n	n	noef	ass	ass	dir	NA	NA	NA
, England relay station: machine that sends a signal from one place to another satellite image: picture taken by a satellite 61961 In the natura! world, wild animals do whatever they must to survive. Some animals are known for their killer instincts. They are among)%>the strongest, scariest, and most deadly creatures alive. What if you could travel around the world to study a few of these animals…	272	395	MUST	COCA:2009:MAG	MAG	13	NatGeog	vb	NA	NA	root	nec	ns	subjextn	circ	n	pres	sim	presvb	NA	n	act	dyn	DO	n	3p	y	y	y	sub.relcl	NA	NA	pos	NA	n	n	n	noef	ass	ass	dir	NA	NA	NA
, ensuring a steady supply to meet demand in Atlanta. The trick for car dealers is to have enough cars on hand to meet demand for, say, 60 days, but not so many cars that they 'll sit on the lot for months. Not long ago, however, you couldn't count Leaf inventory by the month or even the week, Francis said.)%>" Leaf inventory was measured by the hour, " he said. " People would follow the trucks i…	273	151	COULD	COCA:2014:NEWS	NEWS	14	Atlanta	neg.vb	NA	NA	root	pos	ws	gsp	circ	NA	past	sim	presvb	NA	n	act	dyn	COUNT	n	2s	y	y	y	maincl	NA	decl	notc	negmod	n	n	n	noef	ass	ass	dir	NA	NA	NA
, even resort to violence. No, most people with very little would rather be around people who have more than they have, maybe because they think something might come to them just through association. We never thought of ourselves as being poor that way, without expectations, and what it might mean to others. We were always exhausted. There was never any good sleep)%>to be had on the road, never a…	274	227	MIGHT	COCA:2009:ACAD	ACAD	14	SouthwestRev	vb	NA	NA	ep	pos	ws	ep	disint	NA	pres	sim	presvb	NA	n	act	st	MEAN	n	3s	n	n	n	sub.nomcl	THINK	NA	pos	NA	n	n	n	noef	ass	ass	dir	NA	NA	NA
, even though the confrontation is filtered through over a half-century-old stories and pictures. How could anyone not be affected by such inhumane behavior? It is incomprehensible. There is too much horror, too much suffering, too much righteousness. The excesses are overwhelming. Those who carry out such deeds must be deviants or otherwise mentally deranged to have extinguished that most centra…	275	64	MUST	COCA:2003:ACAD	ACAD	14	InfoSystems	vb	NA	NA	ep	nec	ws	ep	disint	NA	pres	sim	presvb	NA	n	act	st	BE	n	3p	y	n	n	maincl	NA	decl	pos	NA	n	n	n	noef	exp	exp	indir	NA	NA	NA
, facing the large executive desk. # The man on the other side blinked twice as though he did n't know quite what to think. # " I'm Janine Hartman. " She drew in a deep breath. '' Gramps said if he wasn't back from his appointment, I should introduce myself. '' # '' Yes, '' Zachary said after a moment of)%>strained silence. " But he did n't tell me you'd be wearing -- " # " Oh, the bandanna dress…	276	153	SHOULD	COCA:2009:FIC	FIC	13	Bk:MarriedInSeattle	vb	NA	NA	root	nec	ns	subjextn	circ	n	pastsub	pos	presvb	NA	n	act	dyn	INTRODUCE	n	1s	y	y	n	maincl	NA	decl	pos	NA	n	n	n	noef	ass	ass	dir	NA	NA	NA
, Fadell is adamant that the inventors need to study in the real world. " Go work with your heroes, " he says. " Do n't try to replicate what they're doing, just go do it with them like I did. Then the next leap is, maybe I can build the next thing. '' Speaking of, what is the next Nest thing)%>? Fadell launches into a story about telling his young son about Protect. His reaction: What are you do…	277	30	CAN	COCA:2013:NEWS	NEWS	14	USAToday	vb	NA	NA	root	pos	ns	ab	subjint	n	pres	sim	presvb	NA	n	act	dyn	BUILD	n	1s	y	y	n	maincl	NA	decl	pos	NA	n	n	n	noef	ass	ass	dir	weak	initial	MAYBE
, Felix Platerus, Guianerius, put Jealousy for a cause of Melancholy, others for a Symptom; because melancholy persons, amongst these passions and perturbations of the mind, are most obnoxious to it. But methinks for the latitude it hath, and that prerogative above other ordinary Symptoms, it ought to be treated of as a Species apart, being of so great and eminent note, so furious a passion, and …	278	236	OUGHT TO	COCA:1999:ACAD	ACAD	14	HispanicRev	vb	n	NA	root	nec	ws	gsn	circ	NA	pres	sim	presvb	NA	n	pas	dyn	TREAT	n	3s	y	n	n	sub.nomcl	THINK	NA	pos	NA	n	n	n	noef	ass	ass	dir	NA	NA	NA
, find.pcworld.com/58635 -Alan Stafford, executive editor Siber Systems RoboForm Hands down, Siber Systems' $30 RoboForm (I use version 6.9.3) is the best tool for storing user names, passwords, and other contact data for Web sites. Here's why: You provide RoboForm with all the vitals you might need to complete a site's formname, address, phone numbers, and even)%>credit card numbers. When you cl…	279	143	MIGHT	COCA:2008:MAG	MAG	13	PCWorld	vb	NA	NA	ep	pos	ws	ep	disint	NA	pres	sim	presvb	NA	n	act	st	NEED TO	n	2s	y	n	n	sub.relcl	NA	NA	pos	NA	n	n	n	noef	ass	ass	dir	NA	NA	NA
, for $150 a night, jumped over trucks and people on his motorcycle. He detonated sticks of TNT at his feet, which felt like " being stung by a thousand wasps, " and drove his motorcycle down hundred-foot-long tunnels of flaming straw bales. Before long, Beckley discovered that he could make more money for less work -- a single, spectacular jump over a long)%>row of cars and trucks -- and by the …	280	221	COULD	COCA:2014:MAG	MAG	13	PopScience	vb	NA	NA	root	pos	ns	op	circ	n	pres	sim	presvb	NA	n	act	dyn	MAKE	n	3s	y	y	n	sub.nomcl	DISCOVER	NA	pos	NA	n	n	n	noef	ass	ass	dir	NA	NA	NA
, foreign policy, and other concerns. # In his new book, " A Simple Government, " former Arkansas Governor Mike Huckabee identifies the family as the most important form of government and correctly asserts that when families fail, governments fail. # Shocking statistics # I don't think I need to convince anyone that America's current troubles are a result of not only governmental breakdown but al…	281	64	NEED TO	COCA:2011:NEWS	NEWS	14	CSMonitor	vb	n	pres	root	nec	ns	subjextn	circ	n	pres	sim	presvb	NA	n	act	dyn	CONVINCE	n	1s	y	y	n	sub.nomcl	THINK	NA	n.rais	NA	n	n	n	noef	ass	ass	dir	NA	NA	NA
, from highly centralized Islamic states in the west to small nomadic herding groups in the east, to an Africanized Byzantine Christian Ethiopia. # The installation, though representing as many cultures as our collection permits, contains several focus areas that explore specific cultures chosen for their disparate character. We are able to show in some depth the arts of the Yoruba of Nigeria, th…	282	265	BE ABLE TO	COCA:2007:ACAD	ACAD	14	AfricanArts	vb	NA	pres	root	pos	ns	op	circ	n	pres	sim	presvb	NA	n	act	dyn	SHOW	n	1p	y	y	n	maincl	NA	decl	pos	NA	n	n	n	noef	ass	ass	dir	NA	NA	NA
, front- runners Trump and Ben Carson will be center stage flanked by Senators Marco Rubio and Ted Cruz battling for third in the polls. Jeb Bush, Carly Fiorina, Jon Kasich and Rand Paul round out the roster. FBN's-second-tier-# It is unfortunate, any time you set up a criteria, someone might fall out of it. I feel even worse, for the people that did)%>n't even make the second debate. You know, L…	283	99	MIGHT	COCA:2015:SPOK	SPOK	14	Fox	vb	NA	NA	ep	pos	ws	ep	disint	NA	pres	sim	presvb	NA	n	act	dyn	FALL OUT	n	3s	y	n	n	maincl	NA	decl	pos	NA	n	n	n	noef	exp	exp	indir	NA	NA	NA
, go to bed. Who's with me!!! " (FYI, it's Dickason, not Dickinson.) Urwhatueat (read that name slowly): " When he says' I'm just gon na give it to ya,' what does he mean exactly? He could be telling the truth. He's not going to give you a car per)%>se, he's just' gon na give it to ya,' whatever that means. " Daryl F.: " Bill Dickason is n't a car salesman or owner. He is a paid actor, dealerships	284	26	COULD	COCA:2013:NEWS	NEWS	14	Austin	vb	NA	NA	ep	pos	ws	ep	disint	NA	pres	sim	presvb	NA	y	act	dyn	TELL	n	3s	y	y	n	maincl	NA	decl	pos	NA	n	n	n	noef	ass	ass	dir	NA	NA	NA
, good to have you with us. As we come on the air this morning, the mystery of what caused Malaysia Air 370 to vanish is deepening. The frantic search for the plane continues, but no signs yet of a crash. MARTHA-RADDATZ# (Voiceover) We have late word that the pilots may have made a last-minute maneuver to turn the plane back, and there is increased)%>scrutiny this morning of as many as four passe…	285	306	MAY	COCA:2014:SPOK	SPOK	14	ABC	vb	NA	NA	ep	pos	ws	ep	disint	NA	pres	ant	pfvbnc	ant	n	act	dyn	MAKE	n	3p	y	y	n	sub.nomcl	HAVE LATE WORD	NA	pos	NA	n	n	n	noef	ass	ass	dir	NA	NA	NA
, grants and other fundraising to augment what they already have. " This is a long term recovery effort, " he stressed. Spencer said individuals and organizations soon will be invited to apply for " long term '' assistance for losses not covered by FEMA or insurance. Applicants also will be able to ask for reimbursements for personal items, home damages and temporary housing, shesaid. About $950,…	286	64	BE ABLE TO	COCA:2013:NEWS	NEWS	14	Denver	vb	NA	fut	root	pos	ns	op	circ	n	fut	sim	presvb	NA	n	act	dyn	ASK FOR	n	3p	y	y	y	maincl	NA	decl	pos	NA	n	n	n	noef	ass	ass	dir	NA	im	ALSO
, Gueldner, Ross, and Isava (2008) discovered little to no change in bullying behaviors after an intervention was conducted. Further, programs in the United States are less effective in completing their aim to reduce bullying behavior (Ttofi, Farrington, & Baldry, 2008). This failure may be a result of attempting to use a '' one size fits all '' approach)%>to addressing bullying, rather than cons…	287	295	MAY	COCA:2015:ACAD	ACAD	14	AmericanSecondary	vb	NA	NA	ep	pos	ws	ep	disint	NA	pres	sim	presvb	NA	n	act	st	BE	n	3s	n	n	n	maincl	NA	decl	pos	NA	n	n	n	noef	ass	ass	dir	NA	NA	NA
, had the misfortune to land his Fieseler Fi 156 Storch aircraft in a freshly laid Russian minefield. General Erich von Manstein took command of the 11th. Blasting into Crimea through deeply echeloned Soviet defenses in the Perekop Isthmus, he kept his eyes on the great prize, Sevastopol. # Before he could get there, however, trouble intervened all over the map. Crimea's central)%>location is a d…	288	86	COULD	COCA:2014:MAG	MAG	13	MilitaryHist	vb	NA	NA	root	pos	ns	op	circ	n	past	sim	presvb	NA	n	act	dyn	GET	n	3s	y	y	n	sub.advcl	BEFORE	NA	pos	NA	n	n	n	noef	ass	ass	dir	NA	e	THERE
, have all your parents voted? (CROSSTALK) A. GORE: OK. Your's have for sure? OK, all right. Now, what kinds of issues are most important to you? What do you think is the most important thing that the next president of the United States ought to do? If you were president of the United States, what's the first thing you would do? Yes? STUDENT: (OFF-MIKE) A. GORE: You'd make a law? What kind of law…	289	326	OUGHT TO	COCA:2000:SPOK	SPOK	14	CNN_Event	vb	n	NA	root	nec	ns	subjextn	disint	n	pres	sim	presvb	NA	n	act	dyn	DO	n	3s	y	y	n	sub.relcl	NA	NA	pos	NA	n	n	n	noef	dir	dir.ireq	dir	NA	NA	NA
, have shifted only temporarily to the Democratic camp. To win them over, he suggested, Republicans should emphasize issues that resonated with them at a time of insecurity, including government spending, debt, government bailouts and terrorism. # The question now is how much of an enduring gain Republicans might get from Mr. McConnell's blocking strategy. For all his efforts, Democrats could)%>v…	290	439	MIGHT	COCA:2010:NEWS	NEWS	14	NYTimes	vb	NA	NA	ep	pos	ws	ep	disint	NA	pres	sim	presvb	NA	n	act	dyn	GET	n	3p	y	n	n	sub.nomcl	BE	NA	pos	NA	n	n	n	noef	ass	ass	indir	NA	NA	NA
, he had many opportunities on a daily basis to gratify that urge. She was stupid to waste time and energy fretting about it. # Unless that is part of the plan, Emma. How long would you wait, for a vengeance? And you can not credit any reason he might give you for how he became your Shield. # Yet had Mikal not betrayed)%>his sworn oath to the sorcerer who had almost killed her, she would be dead,…	291	367	MIGHT	COCA:2012:FIC	FIC	13	Bk:IronWyrmAffair	vb	NA	NA	ep	pos	ws	ep	disint	NA	pres	sim	presvb	NA	n	act	dyn	GIVE	n	3s	y	y	n	sub.relcl	NA	NA	pos	NA	n	n	n	noef	dir	dir.ord	dir	NA	NA	NA
, he has a big piece of land that he's going to build a house on. Why do n't you let him help you? " It's quiet on the other end, and Barbara thinks she might have to slam down the phone and then she hears Ma crying and she has to reach for a chair. '' Ma, '' says Barbara, her own tears rising. " I'm sorry I yelled at you. Please do n't hang up. " # " I might think about it, " says Ma, her voice …	292	300	HAVE TO	COCA:2008:FIC	FIC	13	SouthwestRev	vb	n	pres	root	nec	ns	subjextn	circ	n	pres	sim	presvb	NA	n	act	dyn	REACH	n	3s	y	y	n	maincl	NA	decl	pos	NA	n	n	n	noef	ass	ass	indir	NA	NA	NA
, he is very powerful and very attractive to a woman at that time. SIMON: You're a painter, I gather. Mr-SMIRNOFF: Yes. SIMON: I believe I've seen the mural down by ground zero, 240 feet tall. Mr-SMIRNOFF: Correct. SIMON: And I must say, I didn't think it was you. Mr-SMIRNOFF: I just wanted)%>to contribute something because I was sworn in as an American citizen at the Statue of Liberty ceremony, …	293	63	MUST	COCA:2003:SPOK	SPOK	14	NPR_Saturday	vb	NA	NA	root	nec	ns	subjextn	circ	n	pres	sim	presvb	NA	n	act	dyn	SAY	n	1s	y	y	n	maincl	NA	decl	pos	NA	n	n	n	noef	hedperf	hedperf.ass	dir	NA	NA	NA
, he said after a minute. He wiped his forehead with the cuff of his sleeve. He looked at Ben, then Nathan. He said, You need to finish yet, do n't you? Yes sir. Get to it, he said. It's about dinnertime. We ought to get to the table. She'll get worked up like she does. He picked his hat off the ground and set it on his head. You boys come on, he said, and he walked away, toward the barn and the …	294	367	OUGHT TO	COCA:2011:FIC	FIC	13	The Antioch Review	vb	n	NA	root	nec	ns	subjextn	circ	n	pres	sim	presvb	NA	n	act	dyn	GET TO	n	1p	y	y	n	maincl	NA	decl	pos	NA	n	n	n	noef	ass	ass	dir	NA	NA	NA
, highly intellectual in some cases. " # Watkins added: " They come back and they tell all these stories.... Culture is nothing more than the stories you create in your company. " # But a company's culture, he also stressed, must never be static, and must always help the organization change -- not keep it frozen in a state of inertia)%>. Watkins cited his company's recent honor: Forbes magazine n…	295	60	MUST	COCA:2006:NEWS	NEWS	14	SanFranChron	adv	NA	NA	root	nec	ws	gsn	disint	NA	pres	sim	presvb	NA	n	act	dyn	HELP	n	3s	n	n	y	maincl	NA	decl	pos	NA	n	n	n	noef	ass	ass	dir	NA	m	ALWAYS
, him. " To me this was a story of good versus evil, and to me what made the story worth spending five years of my life on was the involvement of the American museum community, particularly the Museum of Modern Art, '' Shea said. '' And I feel we should question our big cultural institutions about their role in these disputes and about whether they)%>are doing everything they can to research the …	296	488	SHOULD	COCA:2012:NEWS	NEWS	14	Austin	vb	NA	NA	root	nec	ns	subjextn	disint	n	pres	sim	presvb	NA	n	act	dyn	QUESTION	n	1p	y	y	n	sub.nomcl	FEEL	NA	pos	NA	n	n	n	noef	ass	ass	dir	NA	NA	NA
, his hat held under his arm. When he kicked Aunt Lily out, a judge said their daughter would stay with Uncle Taylor. I heard Mama on the phone. " Lily Bentley is a slut. '' My dictionary cleared up the mystery enough for me to suppose that Aunt Lily must have been caught in an affair, a word that made me long for details)%>I was hopeless to know. In the early afternoon, we ate pimento cheese san…	297	410	MUST	COCA:2011:FIC	FIC	13	Bk:DryGrassAugust	vb	NA	NA	ep	nec	ws	ep	disint	NA	pastsub	ant	pfvbnc	ant	n	pas	dyn	CATCH	n	3s	y	n	n	sub.nomcl	SUPPOSE	NA	pos	NA	n	n	n	noef	ass	ass	dir	NA	NA	NA
, housing, transportation, work, health care, social services, and other public accommodations. (NASW, 2003b, p. 273) # Genetic testing is not mentioned anywhere in this latter policy statement, and there is no effort to reconcile the inherent contradictions within the two statements. It should be noted that the 2008 drafts of the revised versions of these policy statements make)%>no efforts to d…	298	146	SHOULD	COCA:2011:ACAD	ACAD	14	SocialWork	vb	NA	NA	root	nec	ws	gsn	circ	NA	pres	sim	presvb	NA	n	pas	dyn	NOTE	y	3s	n	n	n	maincl	NA	decl	pos	NA	n	n	n	noef	hedperf	hedperf.ass	dir	NA	NA	NA
, however, was focused on survival as bullets were zinging overhead and ricocheting off the hard-packed earth. But a few heartbeats later, my training came flooding back and my responsibilities as company commander took over. " Get the machine gun up! Set up a base of fire! '' I had to shout the commands, and of course that attracted more enemy fire. Sergeant David Bodine, the point man and head …	299	412	HAVE TO	COCA:2007:MAG	MAG	13	WashMonth	vb	n	pret	root	nec	ns	subjextn	circ	y	past	sim	presvb	NA	n	act	dyn	SHOUT	n	1s	y	y	n	maincl	NA	decl	pos	NA	n	n	n	noef	ass	ass	dir	NA	NA	NA
, I brought you a present, " she says. Uncle Bruce looks past the bucket and tries to meet her eyes. " A present! Well you know I do n't need any more presents. I don't have any use for them now. '' '' But I thought you might like this one. See? '' Sally stands and points into the bucket.)%>" I found it on the beach this morning. " Uncle Bruce cranes his neck to see into the bucket without leanin…	300	228	MIGHT	COCA:2014:FIC	FIC	13	Confrontation	vb	NA	NA	ep	pos	ws	ep	disint	NA	pastsub	sim	presvb	NA	n	act	st	LIKE	n	2s	y	n	n	sub.nomcl	THINK	NA	pos	NA	n	n	n	noef	ass	ass	dir	NA	NA	NA
, I think that lawsuits are always a last resort, but they are a necessary weapon in the arsenal against racial discrimination. Obviously, there are companies that have implemented affirmative action policies, have sought diversity, have been fair in the treatment of employees, and I think that those companies ought to be sought out and emulated. This company has been caught with its pants down. …	301	149	OUGHT TO	COCA:1996:SPOK	SPOK	14	PBS_Newshour	vb	n	NA	root	nec	ws	gsn	disint	NA	pres	sim	presvb	NA	n	pas	dyn	SEEK OUT	n	3p	y	n	n	sub.nomcl	THINK	NA	pos	NA	n	n	n	noef	ass	ass	dir	NA	NA	NA
, I think, is absolutely ridiculous. I mean, I agree with the guy, they're scum. When we are dealing with this, we need to be much more adamant towards the drug dealer, towards drugs, and take this as an opportunity to really put him where he needs to be. I mean, let's -- There's a good forum to blast from. I mean, we can talk now, we can do some talking. ROOK: Thank you, sir. Jim Moret, let's go…	302	284	NEED TO	COCA:1997:SPOK	SPOK	14	CNN_Talkback	vb	n	pres	root	nec	ws	gsn	circ	NA	pres	sim	presvb	NA	n	act	st	BE	n	3s	y	n	n	sub.nomcl	PUT	NA	pos	NA	n	n	n	noef	ass	ass	dir	NA	NA	NA
, I trust in you. Mother of God, help us. " I then said the Lord's Prayer and a Hail Mary, or maybe two. I looked out the window again, and we were below the skyline rooftops, the river approaching fast. Then, I knew I needed to accept die outcome, whatever it may be. I needed to reconcile to the fact diat I was not in control, and I had to make a decision. I did not want to go into that river in…	303	335	NEED TO	COCA:2009:MAG	MAG	13	SatEvenPost	vb	n	pret	root	nec	ns	subjextn	circ	n	pastsub	sim	presvb	NA	n	act	dyn	ACCEPT	n	1s	y	y	n	sub.nomcl	KNOW	NA	pos	NA	n	n	n	noef	ass	ass	dir	NA	NA	NA
, I, I, I agree with the Colonel. This right now has to focus on the pilot and the co-pilot. GEORGE-STEPHANOPOU# (Off-camera) And - one other thing I was struck by, Colonel Ganyard, by the Defense Minister this morning. He said this case is so unprecedented, it may change aviation history. Nothing like it. Nothing, hopefully, ever again will)%>be like it. the real concern right now, George, is we…	304	114	MAY	COCA:2014:SPOK	SPOK	14	ABC	vb	NA	NA	ep	pos	ws	ep	disint	NA	pres	sim	presvb	NA	n	act	dyn	CHANGE	n	3s	n	n	n	sub.nomcl	SAY	NA	pos	NA	n	n	n	noef	ass	ass	dir	NA	NA	NA
, I'd like them to get my opinion, but they do n't have to necessarily take it. If I did n't want Laettner here, and they brought him in, I would n't feel betrayed. It's their team, and I don't have such an ego that it has to be my way or the highway. Q: So, given your occasional criticism of management-after losing Allan Houston to free agency, for instance-is it a slam dunk that you will re-sig…	305	294	HAVE TO	COCA:1999:MAG	MAG	13	SportingNews	vb	n	pres	root	nec	ws	gsn	circ	NA	pres	sim	presvb	NA	n	act	st	BE	n	3s	n	n	n	sub.advcl	SUCH NP THAT	NA	pos	NA	n	n	n	noef	ass	ass	dir	NA	NA	NA
, I'd venture to say that you could n't find one bad word that one said about the other. Not one. But that might be because they're not really competing against one another. " Whoever wins the AFC championship game, it doesn't answer the question, because it may very well be that the Patriots throw up a defense that befuddles Manning, or)%>vice versa. So you ca n't really settle it. But after the…	306	429	MAY	COCA:2014:NEWS	NEWS	14	Denver	adv	NA	NA	ep	pos	ws	ep	disint	NA	pres	sim	presvb	NA	n	act	st	BE	y	3s	n	n	n	sub.advcl	BECAUSE	NA	pos	NA	n	n	n	noef	ass	ass	dir	str	m	VERY WELL
, identified this as their preferred modus operandi in 1984 (Atcheson, Ebert, and Symes 1984; Razack 1991). # This strategy, however, is costly, time-consuming, and difficult to control. In order to sponsor a test case, interest groups (or their sponsored clients) must first achieve '' standing '' to gain access to the courts. While the barrier)%>of standing was significantly lowered by the Thors…	307	5	MUST	COCA:2004:ACAD	ACAD	14	CanadianStud	adv	NA	NA	root	nec	ns	subjextn	cond	n	pres	sim	presvb	NA	n	act	dyn	ACHIEVE	n	3p	y	y	y	maincl	NA	decl	pos	NA	n	n	n	noef	ass	ass	dir	NA	m	FIRST
, Im sure youve heard by now that Mike Tysons little four-year-old daughter died. She strangled herself while playing with a -- a cable at home. Just another reminder of how unsafe our homes can be for our kids, this morning a very important segment. Were going to show what you need to do -- need to know, the things that you need to be aware of, things you may not have thought of to make sure you…	308	390	NEED TO	COCA:2009:SPOK	SPOK	14	CBS_Early	vb	n	pres	root	nec	ns	subjextn	cond	n	pres	sim	presvb	NA	n	act	dyn	DO	n	2s	y	y	n	sub.nomcl	SHOW	NA	pos	NA	n	n	n	noef	com	com	dir	NA	NA	NA
, in closing that in a republic, we depend upon virtuous leaders and I think there's been a pattern here which shows a lack of virtue on the part of the President. This is a dangerous president . I don't know how I'm going to tell my grandson that he ought to tell the truth all the time and that there are consequences if you do n't do the right thing. That's what I worry about. I worry about the …	309	361	OUGHT TO	COCA:1998:SPOK	SPOK	14	ABC_Nightline	vb	n	NA	root	nec	ns	subjextn	disint	n	pres	sim	presvb	NA	n	act	dyn	TELL	n	3s	y	y	n	sub.nomcl	TELL	NA	pos	NA	n	n	n	noef	ass	ass	dir	NA	NA	NA
, in fact? EMILY-VIRGIN# That has -- that's yet to be determined. We passed a bill in the House, and then it went to the Senate and became pretty different than what we passed in the House, and we're expecting that to go to conference committee. So we may have to wait until the last few weeks of session. And that's just)%>not fair to our students and educators, who are relying on a consistent set…	310	158	MAY	COCA:2014:SPOK	SPOK	14	PBS	vb	NA	NA	ep	pos	ws	ep	disint	NA	pres	sim	presvb	NA	n	act	st	HAVE TO	n	1p	y	n	n	maincl	NA	decl	pos	NA	n	n	n	noef	ass	ass	dir	NA	NA	NA
, in my opinion, no military solution to the problem. If the United States, in Iraq for 10 years, with all the weaponry and all the intelligence assets that it has, was unable to defeat the insurgency without political resolution -- or political deals, the Iraqis will not be able to do it. JUDY-WOODRUFF# But you heard Ambassador Jeffrey say, if nothing isdone, we're looking at a dire change of ci…	311	203	BE ABLE TO	COCA:2014:SPOK	SPOK	14	PBS: PBS Newshour	vb	NA	fut	root	pos	ns	op	circ	n	fut	sim	presvb	NA	n	act	dyn	DO	n	3p	y	y	n	maincl	NA	decl	not	negmod	n	n	n	noef	ass	ass	dir	NA	NA	NA
, in the past three years, have bathed CU's athletic department in red ink. No other school in the Pac 12 has come close to paying $9.3 million in severance as CU has done since 2005. '' We've had some hits on our budgets for getting rid of people we needed to get rid of, '' Benson said. The $20 million athletic department deficit does n't count a $7.5 million shortfall from the 2012 13 fiscal ye…	312	363	NEED TO	COCA:2013:NEWS	NEWS	14	Denver	vb	n	pret	root	nec	ns	subjextn	disint	y	past	sim	presvb	NA	n	act	dyn	GET RID OF	n	1p	y	y	n	sub.relcl	NA	NA	pos	NA	n	n	n	noef	ass	ass	dir	NA	NA	NA
, in the same lane as motorized traffic. # REPORT HAZARDS If you see any dangerous conditions (weather-related or not) for cyclists, such as potholes, excessive debris, or downed wires, report them to the road authorities. Once they are on notice that a hazard exists, they must take steps to address it within a reasonable amount of time or run the risk)%>of being held responsible if a cyclist is …	313	122	MUST	COCA:2012:MAG	MAG	13	Bicycling	vb	NA	NA	root	nec	ns	subjextn	rul	n	pres	sim	presvb	NA	n	act	dyn	TAKE	n	3p	y	y	y	maincl	NA	decl	pos	NA	n	n	n	noef	ass	ass	dir	NA	NA	NA
, including humans. Like other specialists working in the field, Hayman emphasizes the ways in which bats help to maintain healthy forests by keeping insect populations in check, pollinating plant species, and distributing fruit seeds far and wide. He and colleagues explained the case last year: '' PJathogen transfer should be an active area of research in order to develop evidence-based policies…	314	389	SHOULD	COCA:2014:MAG	MAG	13	NaturalHist	vb	NA	NA	root	nec	ws	gsn	cond	NA	pres	sim	presvb	NA	n	act	st	BE	n	3s	n	n	n	maincl	NA	decl	pos	NA	n	n	n	noef	ass	ass	dir	NA	NA	NA
, indicating that all tires are inflated and that the system is operational. # Steve Hendry, marketing manager for sensor products at Freescale Semiconductor in Tempe, Ariz.. said that, although the new rule will not specifically disallow the indirect method, he believes that indirect systems will no longer be able to meet the specifications to be set by NHTSA. # Inside a MEMS tire-pressuremonito…	315	51	BE ABLE TO	COCA:2005:ACAD	ACAD	14	MechanicalEng	vb	NA	fut	root	pos	ws	gsp	circ	NA	fut	sim	presvb	NA	n	act	st	MEET	n	3p	n	n	y	sub.nomcl	BELIEVE	NA	n.adv	NA	n	n	n	noef	ass	ass	dir	NA	m	NO LONGER
, is distracted from and inclined to escape from natural reality (e.g., solitude, fear, stress) through addictive behaviors (e.g., substances, images), and devalues awareness, self-discovery, and authentic community (Galanter, 2005). Persons who knowingly or not detach from their spirits may be more prone to being emotionally-charged (e.g. lack of self-control, anxious),)%>isolated, and dependent…	317	156	MAY	COCA:2009:ACAD	ACAD	14	PhysicalEduc	vb	NA	NA	ep	pos	ws	ep	disint	NA	pres	sim	presvb	NA	n	act	st	BE	n	3p	y	n	y	maincl	NA	decl	pos	NA	n	n	n	noef	ass	ass	dir	NA	NA	NA
, is something that they ca n't seem to get the dad to participate in. So if you're having improvement in those outcomes that does mean a lot for the moms. Next up, more on teen moms. And later, as I said, a woman who thinks all women should be allowed to go topless whenever and wherever they want, including, in this)%>case, in Manhattan, right in the middle of the city. We will continue to take …	318	76	SHOULD	COCA:2012:SPOK	SPOK	14	CNN	vb	NA	NA	root	nec	ws	gsn	disint	NA	pres	sim	presvb	NA	n	pas	st	ALLOW	n	3p	y	n	y	sub.nomcl	THINK	NA	pos	NA	n	n	n	noef	com	com	indir	NA	NA	NA
, it creates tricky terrain for a Latino politician with national ambitions. # Last year, Richardson declared a state of emergency in reaction to the growing flow of illegal immigrants through New Mexico, releasing more resources to law enforcement and distancing himself from pro-immigrant forces. # He says the country now must do both: secure its borders and find a way out of the shadows for)%>m…	319	362	MUST	COCA:2006:NEWS	NEWS	14	Denver	vb	NA	NA	root	nec	ns	subjextn	disint	n	pres	sim	presvb	NA	n	act	dyn	DO	n	3s	y	y	n	sub.nomcl	SAY	NA	pos	NA	n	n	n	noef	ass	ass	dir	NA	im	NOW
, it does n't mean you have to defend him. I'm tired of these apologies. We need to start a business called mix sorry, which does it for you. Like McDonald's but for apologies . PERINO# You can pay for it. TANTAROS# What about an app? You could make a lot of money with an app that apologize -- GUTFELD# Exactly. Or)%>just preemptive apology. TANTAROS# And your first customer is sitting to my left,…	320	308	COULD	COCA:2014:SPOK	SPOK	14	Fox	vb	NA	NA	root	pos	ns	op	disint	n	pres	sim	presvb	NA	n	act	dyn	MAKE	n	2s	y	n	n	maincl	NA	decl	pos	NA	n	n	n	noef	ass	ass	dir	NA	NA	NA
, it is the questions that matter, more than the answers. To control the witness, to advance one's own theory of the case, that is the purpose of cross-examination which can not be reconciled with the purpose of the question of my dream. Is there a single question which could have unlocked Edna's truth? The last I ever heard from Edna Hamilton was)%>her response to a letter I sent to a niece, whe…	321	235	COULD	COCA:2013:FIC	FIC	13	LegalStudiesForum	vb	NA	NA	root	pos	ws	gsp	circ	NA	past	sim	pfvbnc	past	n	act	dyn	UNLOCK	n	3s	n	n	n	sub.relcl	NA	NA	pos	NA	n	n	n	noef	ass	ass	dir	NA	NA	NA
, it would enrich our knowledge of Galileo and the environment in which he lived and worked. " # Subjects of Fornaciari's research include Cangrande della Scala (opposite top), warlord of Verona, and Isabella of Aragon (opposite). Other investigators speculate that the jawbone (left) may be that of Lisa Gherardini, perhaps the model for the Mona Lisa. #)%>Fornaciari believes that the extensive fr…	322	58	MAY	COCA:2013:MAG	MAG	13	Smithsonian	vb	NA	NA	ep	pos	ws	ep	disint	NA	pres	sim	presvb	NA	n	act	st	BE	n	3s	n	n	n	sub.nomcl	SPECULATE	NA	pos	NA	n	n	n	noef	ass	ass	dir	NA	NA	NA
, it's time for them (Iraqis) to take over their own country,' Anderson said. # Eileen Kelley and Karen Crummy contributed to this report. # EXCERPTS # ' Every person who dies in the line of duty leaves a family that lives in sorrow, and comrades who must go on without them. # ' All our military families that mourn can know)%>this: Our nation will never forget the sacrifice their loved one made t…	323	152	MUST	COCA:2003:NEWS	NEWS	14	Denver	vb	NA	NA	root	nec	ns	subjextn	circ	n	pres	sim	presvb	NA	n	act	dyn	GO ON	n	3p	y	y	n	sub.relcl	NA	NA	pos	NA	n	n	n	noef	ass	ass	dir	NA	NA	NA
, Jack, " Asquith was speaking again, " but you have a way about you when it comes to ships and the sea. I was just telling Mr. Dailey how you talked me into making more northing from Saint Lucia and how we found that westerly flow. It's like you can smell wind, and can find a knot of speed in a ship that no)%>one else would have guessed was there. " # " Thank you, sir. " It had been a guess, tak…	324	31	CAN	COCA:2015:FIC	FIC	13	Bk:FrenchPrizeNovel	vb	NA	NA	root	pos	ns	ab	subjint	n	pres	sim	presvb	NA	n	act	st	SMELL	n	2s	y	n	y	sub.advcl	LIKE	NA	pos	NA	n	n	n	noef	exp	exp	indir	NA	NA	NA
, joined recently by the new South Korean government of Lee Myung-bak, has expressed concerns about Pyongyang's continuing silence regarding its nuclear weapons program, the fuzziness of the information Pyongyang has provided on its alleged uranium-enriched activities , and a possible North Korean-Syrian connection. Some Japanese policymakers also fear that Washington may be getting ready to acce…	325	477	MAY	COCA:2008:ACAD	ACAD	14	ForeignAffairs	vb	NA	NA	ep	pos	ws	ep	disint	NA	pres	sim	presvb	NA	y	act	dyn	GET	n	3s	y	y	n	sub.nomcl	FEAR	NA	pos	NA	n	n	n	noef	ass	ass	dir	NA	NA	NA
, leading to a candidate pool that is high on volume and low on relevance. As it aims to tackle these challenges, LinkedIn continues to rapidly grow its member base and pull in larger revenue. And through innovative use of its data and a focus on its members, it believes it can have a big impact. '' Hiring today is still an incredibly manual and laborious)%>process on both sides, " Barrile said. …	326	32	CAN	COCA:2013:NEWS	NEWS	14	WashPost	vb	NA	NA	root	pos	ws	gsp	circ	NA	pres	sim	presvb	NA	n	act	st	HAVE	n	3s	y	n	n	sub.nomcl	BELIEVE	NA	pos	NA	n	n	n	noef	ass	ass	dir	NA	NA	NA
, leaves really just one small signal that something is not quite right, and we think that that might easily be missed. Otherwise, it's a perfect simulation, as far as we know, of an election, and certainly an attacker who was more motivated to keep his attack stealthy might be able to improve on what we did. FLATOW: Could you make it)%>show any number of votes that you want to, from one to, what…	327	24	MIGHT	COCA:2009:SPOK	SPOK	14	NPR_Science	vb	NA	NA	ep	pos	ws	ep	disint	NA	pres	sim	presvb	NA	n	act	st	BE ABLE TO	n	3s	y	n	y	maincl	NA	decl	pos	NA	n	n	n	noef	ass	ass	dir	NA	NA	NA
, like food that has gone rotten, or irresistible attraction, like a pleasant perfume. # This smell comes from " the proximity of the Shepherd, " close to all but especially to the sick, the poorest and most forgotten, the excluded and rejected. There are two principles that can be resolved only in proximity: the principle of unity as greater than conflict ()%>because conflict is about distancing…	328	33	CAN	COCA:2015:MAG	MAG	13	America	vb	NA	NA	root	pos	ws	gsp	circ	NA	pres	sim	presvb	NA	n	pas	dyn	RESOLVE	n	3p	n	n	n	sub.relcl	NA	NA	pos	NA	n	n	n	noef	ass	ass	dir	NA	e	ONLY IN PROXIMITY
, listen -- I'm sure your sixth grade kids are listening -- these guys'll say anything to get elected. But there's a record, and that's what I hope people look at. And one of my promises is going to be Social Security reform and you bet, we need to take a trillion dollar -- trillion dollars out of that $2.4 trillion surplus. Now, remember Social Security revenue exceeds expenses up until 2015. Pe…	329	23	NEED TO	COCA:2000:NEWS	NEWS	14	NYTimes	vb	n	pres	root	nec	ns	subjextn	disint	n	pres	sim	presvb	NA	n	act	dyn	TAKE	n	1p	y	y	n	maincl	NA	decl	pos	NA	n	n	n	noef	ass	ass	dir	NA	NA	NA
, making it 25 24. " I felt like we had a little momentum. It was just a gut instinct, " said Logan, who was going for a state title with a record fourth school. '' Here's a chance, instead of tying this game up, that we can actually play with the lead. I just had faith in the kids. '')%>Creek held Valor after the ensuing kickoff, forcing a punt. Creek, sure enough, soon faced a fourth down decis…	330	34	CAN	COCA:2014:NEWS	NEWS	14	Denver	adv	NA	NA	root	pos	ns	op	circ	n	pres	sim	presvb	NA	n	act	dyn	PLAY	n	1p	y	y	n	sub.relcl	NA	NA	pos	NA	n	n	n	noef	ass	ass	dir	NA	m	ACTUALLY
, melancholy, erratic, inebriated and defiantly queer. " # One serious flaw: too many of the featured films, which hail from the George Eastman House and the Raymond Rohauer Collection, are severely cropped around the edges. Are these the only versions available? # Fans of alternative film ought to also check out the two-disc '' Treasures IV: American Avant-Garde Film, 1947-1986 " and the seven-d…	331	218	OUGHT TO	COCA:2009:NEWS	NEWS	14	Chicago	adv	n	NA	root	nec	ns	subjextn	circ	n	pres	sim	presvb	NA	n	act	dyn	CHECK OUT	n	3p	y	y	y	maincl	NA	decl	pos	NA	n	n	n	noef	ass	ass	dir	NA	m	ALSO
, MIT, and the like may be building massive classes, they are not interested in letting you get Stanford, Harvard, or MIT credit. # The MIT-built MOOCs offer a chance to earn an " MITx '' --not MIT--credential that won't on its own help you toward a degree but might look nice at the bottom of a rsum next to other continuing-ed classes. Coursera)%>classes developed by Princeton, on the other hand,…	332	392	MIGHT	COCA:2013:MAG	MAG	13	Money	vb	NA	NA	ep	pos	ws	ep	disint	NA	pres	sim	presvb	NA	n	act	st	LOOK	n	3s	n	n	n	sub.relcl	NA	NA	pos	NA	n	n	n	noef	ass	ass	dir	NA	NA	NA
, most labs have moved away from microscopic hair comparisons. Labs rely more on a DNA-based technique called mitochondrial analysis to tell two hairs apart. In the technique, examiners collect DNA from within the tiny mitochondria that power a cell. These organelles are stuffed with their own DNA, which examiners can analyze for patterns and use to link hair samples from crime scenes to suspects…	333	35	CAN	COCA:2015:MAG	MAG	13	ScienceNews	vb	NA	NA	root	pos	ns	op	circ	n	pres	sim	presvb	NA	n	act	dyn	ANALYZE	n	3p	y	y	y	sub.relcl	NA	NA	pos	NA	n	n	n	noef	ass	ass	dir	NA	NA	NA
, most people who become addicted to narcotics ca n't stop on their own. A three- to 30-day detox in a medical setting may be required. " But detox is just the tip of the iceberg, " says Neil Capretto, medical director of Gateway Rehabilitation Center in Pittsburgh. '' We need to teach people coping tools so they can five without the drug, or the problem will come back. " # That's what Susan is i…	334	81	NEED TO	COCA:2011:MAG	MAG	13	Shape	vb	n	pres	root	nec	ns	subjextn	disint	n	pres	sim	presvb	NA	n	act	dyn	TEACH	n	1p	y	y	n	maincl	NA	decl	pos	NA	n	n	n	noef	ass	ass	dir	NA	NA	NA
, neighbors described feeling as if they had to go along with the unanimous decisions of the other group members at the beginning. Describing her first few meetings, one neighbor said, " Mine was hell. I ' m 44 years old and they' re trying to tell me what I need to do and what I have to do. '' Moreover, spiritual family members used the unity exercise to require neighbors to attend church. If me…	335	155	NEED TO	COCA:2009:ACAD	ACAD	14	SocialWork	vb	n	pres	root	nec	ns	subjextn	rul	n	pres	sim	presvb	NA	n	act	dyn	DO	n	1s	y	y	n	sub.nomcl	TELL	NA	pos	NA	n	n	n	noef	exp	exp	indir	NA	NA	NA
, no wideout has a TD catch, with each of QB Alex Smith's eight scoring strikes going to a running back or a tight end. Smith has thrown four interceptions, not a large number in five games, but he had only seven last season.... San Diego thought it might have something special in rookie free agent RB Branden Oliver, but it took injuries)%>to Ryan Mathews, Danny Woodhead and Donald Brown to show …	336	42	MIGHT	COCA:2014:NEWS	NEWS	14	USAToday	vb	NA	NA	ep	pos	ws	ep	disint	NA	pastsub	sim	presvb	NA	n	act	st	HAVE	n	3s	y	n	n	sub.nomcl	THINK	NA	pos	NA	n	n	n	noef	ass	ass	dir	NA	NA	NA
, not a teacher -- corporal punishment, I'm talking about -- not a teacher and not a principal? SCHAFFER: I think for most people and for most courts, a confident jurisdiction there is pretty clear line between legitimate corporal punishment and what constitutes child abuse. And sure, that ought to be explored. Parents ought to sue if children are legitimately beaten by people in schools. But, on…	337	129	OUGHT TO	COCA:2001:SPOK	SPOK	14	CNN_Crossfire	vb	n	NA	root	nec	ws	gsn	disint	NA	pres	sim	presvb	NA	n	pas	dyn	EXPLORE	n	3s	n	n	n	maincl	NA	decl	pos	NA	n	n	n	noef	ass	ass	dir	NA	NA	NA
, not much has really changed between us, except that I moved out of L.A. " " A divorce that has n't changed much? " Nate asked, tilting his head in question. " Never mind, '' he said, shaking his head. '' Don't tell me. It might be more than I want to know. '' Clay laughed in good humor,)%>though he was n't sure it was funny. He and Isabel were n't right for each other, but that had n't stopped …	338	79	MIGHT	COCA:2011:FIC	FIC	13	Bk:PromiseCanyon	vb	NA	NA	ep	pos	ws	ep	disint	NA	pres	sim	presvb	NA	n	act	st	BE	n	3s	n	n	n	maincl	NA	decl	pos	NA	n	n	n	noef	ass	ass	dir	NA	NA	NA
, now that I'd put a name to the penis. " I'm heading down to the bagel shop. How' bout you? " I told him I was headed for my truck. " Woof ! '' he exclaimed, aroused by the mere mention of my vehicle. I must've rolled my eyes just a little. '' What? '' he asked.)%>" It's not that butch a truck, " I told him. He laughed and charged off. As I watched his broad shoulders navigate the stream of pede…	339	390	MUST	COCA:2007:FIC	FIC	13	Bk:MichaelTolliver	vb	NA	NA	ep	nec	ws	ep	disint	NA	pres	ant	pfvbc	ant	n	act	dyn	ROLL	n	1s	y	y	n	maincl	NA	decl	pos	NA	n	n	n	noef	ass	ass	dir	NA	NA	NA
, officials said. # Financing # Because Cypress-Fairbanks is mainly residential, taxpayers must carry twice the burden for construction. The tax rate for debt is 30 cents per $100 of assessed property value, compared with HISD 's 15 cents. # '' A district with a static student enrollment does not need to construct three to four new campuses per year, '' Cy-Fair spokeswoman Kelli Durham said. # Th…	340	242	NEED TO	COCA:2007:NEWS	NEWS	14	Houston	vb	y	pres	root	nec	ns	subjextn	disint	n	pres	sim	presvb	NA	n	act	dyn	CONSTRUCT	n	3s	y	y	y	maincl	NA	decl	notc	negmod	y	n	n	noef	ass	ass	dir	NA	NA	NA
, Ohio What an eco-hero to feature in E! Amy Dacyczyn (" Getting Off the Treadmill, " sidebar to " Enough! ") has reduced her consumption and even visits up to 30 yard sales a day... to provide for her six children! Hello! Hello! Someone needs to tell Amy about contraception and E about overpopulation. If Dacyczyn's progeny adopt her frugal lifestyle (of which there is no guarantee) and her ferti…	341	291	NEED TO	COCA:1996:MAG	MAG	13	Environmental	vb	n	pres	root	nec	ns	subjextn	disint	n	pres	sim	presvb	NA	n	act	dyn	TELL	n	3s	y	y	n	maincl	NA	decl	pos	NA	n	n	n	noef	ass	ass	indir	NA	NA	NA
, Ohio, who warned that pregnant women and infants should n't drink tap water after nitrate levels spiked above federal standards in June-are watching the Iowa suit closely. # Now that Des Moines Water Works has broken the taboo of challenging corn growers on their own turf, other municipalities and citizen groups may be emboldened. Hamilton of Drake University says that the suit '' has already i…	342	246	MAY	COCA:2015:MAG	MAG	13	MotherJones	vb	NA	NA	ep	pos	ws	ep	disint	NA	pres	sim	presvb	NA	n	act	st	BE	n	3p	y	n	n	maincl	NA	decl	pos	NA	n	n	n	noef	exp	exp	dir	NA	NA	NA
, on vacation in Boston with his family. " There was a sense of not saying anything negative about the war because of patriotism. I think it's become evident that there needs to be some strong, critical debate about getting our troops to safety. '' # '' I think we need to realize that there's a lot of different views in the world besides ours , " adds Mr. Williams, echoing recent surveys showing …	343	236	NEED TO	COCA:2006:NEWS	NEWS	14	CSMonitor	vb	n	pres	root	nec	ns	subjextn	disint	n	pres	sim	presvb	NA	n	act	st	REALIZE	n	1p	y	n	y	sub.nomcl	THINK	NA	pos	NA	n	n	n	noef	ass	ass	dir	NA	NA	NA
, only a select few of the Saintsmainly church leaderspracticed plural marriage, and most of them did it out of compassion, taking up women who were old and feeble. But Ella was not reassured, and when Andrew asked her to marry him, she hesitated, telling him she feared he might someday enter into celestial marriage. # Andrew was shockedand then offended. The idea)%>sickened him, too, he said. Th…	344	380	MIGHT	COCA:2012:FIC	FIC	13	Bk:TrueSisters	adv	NA	NA	root	pos	ws	gsp	circ	NA	pastsub	pos	presvb	NA	n	act	dyn	ENTER	n	3s	y	y	n	sub.nomcl	FEAR	NA	pos	NA	n	n	n	noef	ass	ass	dir	NA	m	SOMEDAY
, open enrollment policy was continued. Their actions were crucial to the continuation of LCMS's development as a caring community and a clear example of how, by working together, LCMS had further facilitated caring in the larger context. # Because professional development directly influences teachers' role responsibilities, teachers need to have decision-making authority for their own profession…	345	54	NEED TO	COCA:2003:ACAD	ACAD	14	ClearingHouse	vb	n	pres	root	nec	ns	subjextn	circ	n	pres	sim	presvb	NA	n	act	st	HAVE	n	3p	y	n	y	maincl	NA	decl	pos	NA	n	n	n	noef	ass	ass	dir	NA	NA	NA
, or as conscious role taking (Batson, 1991; Davis, 1996). Kohut (1959) was one of the first to articulate that both the conscious (for example, perspective taking) and implicit or unconscious (for example, emotion sharing) processes are vital to empathy and must be integrated to achieve a true empathic reaction or response. # TABLE: Table)%>1: Subjective and Communicated Aspects of Empathy # Tab…	346	56	MUST	COCA:2011:ACAD	ACAD	14	SocialWork	vb	NA	NA	root	nec	ws	gsn	cond	NA	pres	sim	presvb	NA	n	pas	dyn	INTEGRATE	n	3p	n	n	y	sub.nomcl	ARTICULATE	NA	pos	NA	n	n	n	noef	ass	ass	dir	NA	NA	NA
, or even the trash left in his pouch from a bag of candy orange slices deposited by the last occupant of seat 13D. Thirteen D?!? Thirteen? Why, if high-rises were erected without a thirteenth floor, if elevators went without mentioning the number, surely the airline industry ought to know better. Good god, how could he be sitting in... The plane bumped again, boat on rough water, toy falling dow…	347	75	OUGHT TO	COCA:2001:FIC	FIC	13	Bk:LivingToTell	vb	n	NA	root	nec	ns	subjextn	disint	n	pres	sim	presvb	NA	n	act	st	KNOW	n	3s	y	n	n	maincl	NA	decl	pos	NA	n	n	n	noef	exp	exp	indir	NA	NA	SURELY+BETTER
, or eyes distant villages, rising phoenixlike from the tawny-rose savanna clay. Of course, he sees women, bronze from this distance, hair dyed like inky wine in the evening sun, as they move their burdens silently along the horizon. The best version of things I won't be able to imagine till later, when I am alone in a way I didn'tknow people could be. I move to Acapulco, where cliff diving at ni…	348	86	BE ABLE TO	COCA:1999:FIC	FIC	13	Esquire	vb	NA	fut	root	pos	ws	gsp	circ	NA	fut	sim	presvb	NA	n	act	st	IMAGINE	n	1s	y	n	n	sub.relcl	NA	NA	notc	negmod	n	n	n	noef	ass	ass	dir	NA	NA	NA
, or stanzas to support ease of reference, focus, and discussion. If children can not annotate and write in the text, lines can be numbered using small sticky notes. If teachers use shared reading with emerging readers, they should point to the section being read, identify where students should focus, and clarify how much of the passage should be read or listened to)%>at a time. Teach children ho…	349	72	SHOULD	COCA:2013:ACAD	ACAD	14	ReadingTeacher	vb	NA	NA	root	nec	ns	subjextn	rul	n	pres	sim	presvb	NA	n	act	dyn	FOCUS	n	3p	y	y	y	sub.nomcl	IDENTIFY	NA	pos	NA	n	n	n	noef	ass	ass	dir	NA	NA	NA
, Otosan slowing like an animal stuck in a tar pit. Okasan wiped a patch of whiskey from the table, then Maki got up off her knees, stretched her arms. " I'm going to take my bath, '' she said, kissing Otosan on the cheek the way one might kiss a dead relative at a wake. '' Oyasumi. '' # '' Oyasumi)%>, " he said, blowing the smoke into her hair. Good night. With his free hand, he cracked open a S…	350	403	MIGHT	COCA:2011:FIC	FIC	13	SouthernRev	vb	NA	NA	ep	pos	ws	ep	disint	NA	pres	sim	presvb	NA	n	act	dyn	KISS	n	3s	y	y	n	sub.relcl	NA	NA	pos	NA	n	n	n	noef	ass	ass	dir	NA	NA	NA
, outraged, and mobilized the public and riveted the public's attention in a way we've just not seen with past mass shootings. " It remains to be seen what proposals will win favor, but some political scientists suggest that banner issues, such as a ban on assault-style weapons, might fade in favor of mundane, but perhaps more effective, efforts such as shoring)%>up mental health records, which O…	351	292	MIGHT	COCA:2013:NEWS	NEWS	14	CSMonitor	vb	NA	NA	ep	pos	ws	ep	disint	NA	pres	sim	presvb	NA	n	act	dyn	FADE	n	3p	n	n	n	sub.nomcl	SUGGEST	NA	pos	NA	n	n	n	noef	ass	ass	dir	NA	NA	NA
, Paris pushed ahead this spring to make Mayotte, a tiny island between Madagascar and Mozambique, the 101st dpartement of the French Republic. The residents will be taxed, and receive welfare benefits-mainly the latter-just like on the mainland. They will be fully represented in the French Parliament and will be able to vote in all elections, including the European ones, because they will becons…	352	55	BE ABLE TO	COCA:2009:MAG	MAG	13	Newsweek	vb	NA	fut	root	pos	ns	perm	rul	n	fut	sim	presvb	NA	n	act	dyn	VOTE	n	3p	y	y	y	maincl	NA	decl	pos	NA	n	n	n	noef	ass	ass	dir	NA	NA	NA
, pleading with them not to press charges? " " I never asked you to do that, " I said. " Well, Mrs. Gaitlin, we'll need to think this over,' " she said, putting on a pinched and simpering tone of voice. '' We'll need to give it some thought,' they told me. That insufferable Jim McLeod : I doubt if you fully comprehend, Mrs. Gaitlin, what a rare and valuable object that ivory happened to be.' They…	353	13	NEED TO	COCA:1998:FIC	FIC	13	Bk:PatchworkPlanet	vb	n	fut	root	nec	ns	subjextn	circ	n	fut	sim	presvb	NA	n	act	dyn	GIVE	n	1p	y	y	n	maincl	NA	decl	pos	NA	n	n	n	noef	ass	ass	dir	NA	NA	NA
, plot, style, tone, characterization and a score of other things -- but it is the imagery that makes the book " stand out " somehow; to come alive; to glow with its own light . I'm fond of telling my writing classes that all the sophistries of fiction must follow story, that simple caveman invention ('' I was walking through the forest)%>when the tiger leaped down on me ") that held his audience…	354	485	MUST	COCA:2010:ACAD	ACAD	14	Writer	vb	NA	NA	root	nec	ws	gsn	rul	NA	pres	sim	presvb	NA	n	act	dyn	FOLLOW	n	3p	n	n	y	sub.nomcl	TELL	NA	pos	NA	n	n	n	noef	ass	ass	dir	NA	NA	NA
, pompous interference. Plus, I am humiliated in retrospect to think that all the while that I was spinning yarns aboutfiattires and transmission fiuid, Ron was busy scotch-taping my marriage back together. There's no statute of limitations on pure shame. Well, it won't happen again. I can promise you that. From now on I'm paying fierce attention to everyone I)%>meet, hanging on their every word,…	355	36	CAN	COCA:2014:FIC	FIC	13	SatEvenPost	vb	NA	NA	root	pos	ns	op	circ	y	pres	sim	presvb	NA	n	act	st	PROMISE	n	1s	y	n	n	maincl	NA	decl	pos	NA	n	n	n	str	hedperf	hedperf.com	dir	NA	NA	NA
, president of TheFire.org, a group that fights to defend the right to free speech on college campuses. " They are representatives of the college. So we do recognize that universities have increased power to place limitations on students who are athletes. # '' We have seen a worrisome trend this might be going a bit far. '' # Such as in Kent State's case)%>. Only approved friends are allowed on F…	356	434	MIGHT	COCA:2006:NEWS	NEWS	14	Atlanta	vb	NA	NA	ep	pos	ws	ep	disint	NA	pres	sim	presvb	NA	y	act	dyn	GO	n	3s	n	n	n	sub.relcl	NA	NA	pos	NA	n	n	n	noef	exp	exp	dir	NA	NA	NA
, reacb for bim. He squeezes bis eyes sbut and tries to summon bis earlier feeling of bappiness, tries to imagine what bis new apartment will look like. Eyes closed, be works to picture bimself in bis brand new bedroom, surrounded by bis own four walls, but all be can see are tbe open and unblinking eyes of tbe nearby doll. His sisters --)%>Carmen, Pilar, and Leticia -- had painted his face and c…	357	37	CAN	COCA:2014:FIC	FIC	13	SouthwestRev	vb	NA	NA	root	pos	ns	ab	subjint	n	pres	sim	presvb	NA	n	act	st	SEE	n	3s	y	n	n	maincl	NA	decl	pos	NA	n	n	n	noef	ass	ass	dir	NA	NA	NA
, reading and writing op- eds and, who knew, maybe even trying their hand at a novel. # A single day was usually all it took for each of them to plow through the hundreds of listings in the fat real- estate guide and place each into one of two categories -- Ca n't Afford It or Wouldn't Have It As a Gift -- before tossing thebooklet aside in disgust, because everything was more expensive this year…	358	38	CAN	COCA:2009:FIC	FIC	13	Bk:OldCapeMagic	neg.vb	NA	NA	root	pos	ns	op	circ	n	pres	sim	presvb	NA	n	act	st	AFFORD	n	NA	NA	NA	n	NA	NA	NA	notc	negmod	n	n	n	noef	ass	ass	dir	NA	NA	NA
, recruiting from the same or limited sources may perpetuate existing patterns of discrimination. 4. Recruiting from a variety of sources expresses good will to your customers and your community. For example, if you are selecting candidates from only one out of a half dozen schools in your area, you may be viewed as being unfair or biased. Remember the parents of all those students)%>are your tar…	359	276	MAY	COCA:2010:MAG	MAG	13	Essence	vb	NA	NA	ep	pos	ws	ep	disint	NA	pres	sim	presvb	NA	n	pas	st	VIEW	n	2s	y	n	n	maincl	NA	decl	pos	NA	n	n	n	noef	ass	ass	dir	NA	initial	FOR EXAMPLE
, research by Corinne A. Moss-Racusin at Yale University showed that physicists, chemists, and biologists are more likely to view male scientists more favorably than a woman with the exact same qualifications. # Do we find this kind of gender bias in the amateur astronomy community? Absolutely. Gender role stereotypes can be subtle, but they are pervasive and deeply rooted in our culture. #)%>Ass…	360	39	CAN	COCA:2015:MAG	MAG	13	Astronomy	vb	NA	NA	root	pos	ws	gsp	circ	NA	pres	sim	presvb	NA	n	act	st	BE	n	3p	n	n	n	maincl	NA	decl	pos	NA	n	n	n	weak	ass	ass	dir	NA	NA	NA
, safety guidelines, instructions for rapid assessment and protocols for removing victims from a scene and transporting them to hospitals. That plan is being finalized. Law enforcement should consider buying a drone for surveillance of high intensity crime scenes, the report suggested. A '' low cost remotely piloted vehicle '' can improve safety of police pursuits, as well as assist officers in s…	361	40	CAN	COCA:2014:NEWS	NEWS	14	Denver	vb	NA	NA	root	pos	ws	gsp	circ	NA	pres	sim	presvb	NA	n	act	dyn	IMPROVE	n	3s	n	n	y	maincl	NA	decl	pos	NA	n	n	n	noef	ass	ass	indir	NA	NA	NA
, safety on the street continues. I think the people do care seriously about whether or not there was any efforts to block anybody else from telling the truth before a grand jury under oath or any other judicial proceedings. SCHIEFFER: All right. Mayor BROWN: The only question Kenneth Starr ought to ask is,' President Clinton, did you do the following? Did you tell someone to go before a grand ju…	362	331	OUGHT TO	COCA:1998:SPOK	SPOK	14	CBS_FaceNation	vb	n	NA	root	nec	ns	subjextn	disint	n	pres	sim	presvb	NA	n	act	dyn	ASK	n	3s	y	y	n	sub.relcl	NA	NA	pos	NA	n	n	n	noef	ass	ass	dir	NA	NA	NA
, Santa de las Rosas, make her free. Then she go back to whatever she's doing. She do n't even say hello. Why do I need to talk to you? she says. You 're my child. Nothing could change that. Mami bugging, talking about me having to get a job. Especially since Papi have left us, she super paranoid about money. She says I ai n't no nina no more, that I gots to start acting like a senorita and shit.…	363	451	HAVE TO	COCA:2002:FIC	FIC	13	Bk:Soledad	vb	n	ing	root	nec	ns	subjextn	circ	n	pres	sim	presvb	NA	n	act	dyn	GET	n	1s	y	y	n	sub.nomcl	TALK ABOUT	NA	pos	NA	n	n	n	noef	ass	ass	dir	NA	NA	NA
, says child psychiatrist and geneticist Matthew State of Yale University School of Medicine. " These are all, in their own way, making a chink in the armor. " -Laura Sanders # Proteins known to be related to autism (pink and purple) have been linked with over 500 proteins that may be Involved, newly found (blue) and old (tan). Sidebar)%># Multicellular life from a test tube # In less than two mo…	364	263	MAY	COCA:2011:MAG	MAG	13	ScienceNews	vb	NA	NA	ep	pos	ws	ep	disint	NA	pres	sim	presvb	NA	n	act	st	BE	n	3p	n	n	n	sub.relcl	NA	NA	pos	NA	n	n	n	noef	ass	ass	dir	NA	NA	NA
, senior vice president, Compaq Computer Corp; or Virginia (Walker), the first black woman to be among the 100 highest paid executives in Silicon Valley. Yes, we can get there from here. We just need to stop waiting for help to cross the digital divide. We need to cross it by ourselves. (*) Source: U.S. Department of Commerce , Falling Through the Net: Defining the Digital Divide, Charts II-33 &;…	365	132	NEED TO	COCA:2002:MAG	MAG	13	Parenting	vb	n	pres	root	nec	ns	subjextn	disint	n	pres	sim	presvb	NA	n	act	dyn	STOP	n	1p	y	y	n	maincl	NA	decl	n.adv	NA	n	n	n	noef	exp	exp	dir	weak	im	JUST
, seven, eight months. And we had concluded it was an important story, but we just did n't have enough. Once we, once we examined the police report, once we read the' Roll Call '' news report, we decided that it was an important story that Idahoans needed to know. JOHN-DONVAN-1ABC-# (Voiceover) Combined with rumors that dated back to the 1980s, when Congressman Craig had earlier felt compelled to…	366	350	NEED TO	COCA:2007:SPOK	SPOK	14	ABC_Nightline	vb	n	pret	root	nec	ns	subjextn	disint	n	pastsub	sim	presvb	NA	n	act	st	KNOW	n	3p	y	n	y	sub.relcl	NA	NA	pos	NA	n	n	n	noef	ass	ass	dir	NA	NA	NA
, she lied, not even knowing exactly what lie she was telling. Yes, you're right. You found it. Do n't worry about anything now. His eyes filled with tears. You must help me, he said. I can not take the news myself. The Prophet must know where this world is. I will do it, Tahiri said. This)%>time she was not lying. Hul Qat closed his eyes, and even without using the Force, Tahiri felt him leave. …	367	154	MUST	COCA:2003:FIC	FIC	13	Bk:FinalProphecy	vb	NA	NA	ep	nec	ws	ep	disint	NA	pres	sim	presvb	NA	n	act	st	KNOW	n	3s	y	n	n	maincl	NA	decl	pos	NA	n	n	n	noef	ass	ass	dir	NA	NA	NA
, sidestepping the question. " Say, Lucy, you have a brother? Will, is that right? " When Lucy nodded in surprise, he continued. " I know Aubrey's looking for an apprentice , a turner. He wants an eager lad who knows his letters and who could belt out a right good story. Father says you're quick enough, so)%>I thought it might run in the family. " # Lucy shook her head. " Will can not read so wel…	368	390	COULD	COCA:2013:FIC	FIC	13	Bk:MurderAtRosamunds	vb	NA	NA	root	pos	ns	ab	subjint	n	pres	sim	presvb	NA	n	act	dyn	BELT OUT	n	3s	y	y	n	sub.relcl	NA	NA	pos	NA	n	n	n	noef	ass	ass	dir	NA	NA	NA
, so I ca n't tell you whether he's a decent guy, but decent people rein that in. They fight against that instinct. And I think that what -- the point of this piece and the point that I would embrace is that even people who had those kinds of feelings ought to say, you know what, there was some good stuff that happened here , including the toppling of Saddam Hussein and you and I and this fellow …	369	223	OUGHT TO	COCA:2003:SPOK	SPOK	14	Fox_OReilly	vb	n	NA	root	nec	ns	subjextn	disint	n	pres	sim	presvb	NA	n	act	dyn	SAY	n	3p	y	y	n	sub.nomcl	BE	NA	pos	NA	n	n	n	noef	ass	ass	dir	NA	NA	NA
, so there is no excuse for not doing your homework. Yet at one-on-ones, both editors and agents are routinely pitched books that they would never acquire or represent. That's a huge waste of your time -- and theirs. And if you're meeting with a prospective client, you should go in with some knowledge of its business. When I met with the director)%>of marketing for a nonprofit, I'd visited the We…	370	451	SHOULD	COCA:2010:ACAD	ACAD	14	Writer	vb	NA	NA	root	nec	ns	subjextn	cond	n	pres	sim	presvb	NA	n	act	dyn	GO IN	n	2s	y	y	y	maincl	NA	decl	pos	NA	n	n	n	noef	ass	ass	dir	NA	NA	NA
, some Muslim cabdrivers at the Minneapolis-St. Paul International Airport announced they wouldrefuse rides to passengers carrying alcohol, even in unopened bottles. Not long after that, a few Muslim store clerks refused to handle packages of bacon -- even though they were sealed in plastic. (In fairness, I should point out that most Muslims don't take things this far. It was a)%>small group that…	371	81	SHOULD	COCA:2009:ACAD	ACAD	14	Humanist	vb	NA	NA	root	nec	ns	subjextn	circ	n	pres	sim	presvb	NA	n	act	dyn	POINT OUT	n	1s	y	y	n	maincl	NA	decl	pos	NA	n	n	n	weak	hedperf	hedperf.ass	dir	NA	NA	NA
, some of them nothing more than tumbledown wrecks, line the road. By current standards, the truck is primitive. The suspension is ridiculously stiff -- we bounce over every rut and pothole. Carl has to double-clutch between second and third. The steering has so much slop that my brother has to make constant corrections to keep the truck on our side of the road. The heater has one setting: blowto…	372	297	HAVE TO	COCA:2010:MAG	MAG	13	PopMech	vb	n	pres	root	nec	ns	subjextn	circ	n	pres	sim	presvb	NA	n	act	dyn	MAKE	n	3s	y	y	n	sub.advcl	SO MUCH NP THAT	NA	pos	NA	n	n	n	noef	ass	ass	dir	NA	NA	NA
, someone by the name of Proud White Chap, worried that after the shooting in the Aurora, Colorado movie theater last month, Congress would " join forces " and confiscate guns from people, infringing on constitutional protections for firearms. Some visitors to the chat room theorized the Sikh temple shooter must have been a government plot to stir up sentiment against white supremacists. Others n…	373	257	MUST	COCA:2012:NEWS	NEWS	14	CSMonitor	vb	NA	NA	ep	nec	ws	ep	disint	NA	pastsub	ant	pfvbnc	ant	n	act	st	BE	n	3s	y	n	n	sub.nomcl	THEORIZE	NA	pos	NA	n	n	n	noef	ass	ass	dir	NA	NA	NA
, sort of, appeasement feelings that they can do this. The reset policy has been an utter failure. This is a stab in the back. This is a slap in the face. And I actually agree with Senator Schumer, that has to come with consequences. And the administration should proceed just like we just now discussed. SCHIEFFER# All right. Congressman, you)%>said a couple weeks ago that you thought the NSA surv…	374	192	SHOULD	COCA:2013:SPOK	SPOK	14	CBS	vb	NA	NA	root	nec	ns	subjextn	disint	n	pres	sim	presvb	NA	n	act	dyn	PROCEED	n	3s	y	y	n	maincl	NA	decl	pos	NA	n	n	n	noef	exp	exp	indir	NA	ie	JUST LIKE WE JUST NOW DISCUSSED
, strolled to a local trattoria for dinner. But she had made ber decision twenty years ago and resolved then to Uve with it. After Tommy was born the marriage gradually came apart and she accepted responsibility for this. Her career, her art, always came first, and their relationship could not survive that. He said she had to make the choice, and she)%>agreed. She moved out. Jeff retained custody…	375	286	COULD	COCA:2015:FIC	FIC	13	LegalStudiesForum	neg.vb	NA	NA	root	pos	ws	gsp	circ	NA	past	sim	presvb	NA	n	act	dyn	SURVIVE	n	3s	n	n	n	maincl	NA	decl	not	negmod	n	n	n	noef	ass	ass	dir	NA	NA	NA
, Teddy were on the air with everybody else on the show and then he started talking with you about, you know money and said that you know, you said you were always loaning him money, and you're so generous to him, and then he said that he's always having to ask you for the money that you promised to loan him. And you were getting increasingly angrier with him. And this erupted into this huge figh…	376	457	HAVE TO	COCA:2009:SPOK	SPOK	14	NPR_FreshAir	vb	n	ing	root	nec	ns	subjextn	circ	n	pres	sim	presvb	NA	n	act	dyn	ASK	n	3s	y	y	n	sub.nomcl	SAY	NA	pos	NA	y	n	n	noef	ass	ass	dir	NA	m	ALWAYS
, Texas, today during a visit with Italian Prime Minister Silvio Berlusconi. PRESIDENT-GEORGE-W: The desire by the North Koreans to convince the world that they're in the process of developing a nuclear arsenal is nothing new. I mean, we've known that for a while. And therefore, we must continue to work with the neighborhood to convince Kim Jong Il that his decision is)%>an unwise decision. SPENC…	377	449	MUST	COCA:2003:SPOK	SPOK	14	PBS_Newshour	vb	NA	NA	root	nec	ns	subjextn	cond	n	pres	sim	presvb	NA	n	act	dyn	CONTINUE	n	1p	y	y	n	maincl	NA	decl	pos	NA	n	n	n	noef	ass	ass	dir	NA	NA	NA
, thankfully, had been hoisted into the cargo bay before the crash. " Kennedy! " Ross dropped to his knees beside her. She lay eerily still, on her side. " Hey, Kennedy, '' he said, '' Move your ass. Move your fucking ass! We need to get out. '' Don't be dead, he thought. Please do n't be dead. Damn, he hated this. Too many times, he'd turned a soldier over to find him -- or her -- too far gone, …	378	130	NEED TO	COCA:2010:FIC	FIC	13	Bk:SummerHideaway	vb	n	pres	root	nec	ns	subjextn	circ	n	pres	sim	presvb	NA	n	act	dyn	GET OUT	n	1p	y	y	n	maincl	NA	decl	pos	NA	n	n	n	noef	dir	dir.sug	indir	NA	NA	NA
, that are fighting back, but that do nt necessarily offer a model of the world that everybody wants to join. And, on the other hand, you have these governments, the modern Arab security state governments, that are non-democratic, largely corrupt, often inefficient. They havent been able to give their people either security or prosperity or a decent democratic life. JEFFREY-BROWN: Even in Hezboll…	379	293	BE ABLE TO	COCA:2009:SPOK	SPOK	14	PBS_Newshour	vb	NA	prespf	root	pos	ns	ab	subjint	n	pres	sim	presvb	NA	n	act	dyn	GIVE	n	3p	y	y	n	maincl	NA	decl	notc	negmod	n	n	n	noef	ass	ass	dir	NA	NA	NA
, that class of Catholics give sic little or NO financial support to any of the Catholic Churches in the city. # In the midst of the conflict Mrs. O'Donnell from a nearby parish warned Dougherty of death threats against him. '' This subject is the talk of the whole town.... Why must you endanger your life for that little parish?... You do not know the)%>Italians when they are angry they are wild,…	380	372	MUST	COCA:2003:ACAD	ACAD	14	ChurchHistory	subjinv	NA	NA	root	nec	ns	subjextn	disint	n	pres	sim	presvb	NA	n	act	st	ENDANGER	n	2s	y	n	n	maincl	NA	int	pos	NA	n	n	n	noef	dir	dir.ireq	dir	NA	NA	NA
, that's -- their explanation of questions that I ask that they're not familiar with because they do n't have enough background on the problems of the nation. I'm trying to tie my journalism to service for the people out over the country HANSEN You're a single mom, you had to endure the discrimination that I think any woman coming up through Washington has, for the last several decades MCCLENDON …	381	360	HAVE TO	COCA:1996:SPOK	SPOK	14	NPR_Sunday	vb	n	pret	root	nec	ns	subjextn	circ	n	past	sim	presvb	NA	n	act	st	ENDURE	n	2s	y	n	n	maincl	NA	decl	pos	NA	n	n	n	noef	ass	ass	dir	NA	NA	NA
, the Associated Press reports. The Monitor listened to the recordings via the Connecticut Post website on Wednesday afternoon. For readers who are interested, here's a brief summary of the content, and a comment from a school security expert: As information of a shooting comes in, a dispatcher can be heard saying, apparently to police, '' Get everyone you can going down)%>there. " In one of the …	382	41	CAN	COCA:2013:NEWS	NEWS	14	CSMonitor	vb	NA	NA	root	pos	ws	gsp	circ	NA	pres	sim	presvb	NA	n	pas	st	HEAR	n	3s	y	n	n	maincl	NA	decl	pos	NA	n	n	n	noef	ass	ass	dir	NA	NA	NA
, the Braves (13-0) have executed Johnson's offense at a rate not often seen at the high school level. They spread the field. They get their athletes in space. And then they do it again 12-15 seconds later. '' What's awesome about that is no single man can take over a game on defense, '' said Rosen, the star junior quarterback)%>who has proved the ideal triggerman for the system. " Our theory is …	383	42	CAN	COCA:2013:NEWS	NEWS	14	OrangeCR	vb	NA	NA	root	pos	ws	gsp	circ	NA	pres	sim	presvb	NA	n	act	dyn	TAKE OVER	n	3s	y	y	y	sub.nomcl	BE	NA	n.subj	NA	n	n	n	noef	exp	exp	dir	NA	NA	NA
, the dishonesty, and the disregard for the opinions of others that got us there. The next president needs to send a clear signal to the world that America has turned the corner and will once again be a leader rather than a unilateralist loner. To do this, the new president must first end the Iraq war. We need to withdraw all our troops and embrace)%>a decisive new political strategy that engages…	384	315	MUST	COCA:2008:ACAD	ACAD	14	ForeignAffairs	adv	NA	NA	root	nec	ns	subjextn	cond	n	pres	sim	presvb	NA	n	act	dyn	END	n	3s	y	y	n	maincl	NA	decl	pos	NA	n	n	n	noef	ass	ass	dir	NA	m	FIRST
, the effect on children is significantly greater than when the same curriculum is implemented without training and support for families (Webster-Stratton et al., 2001, 2004). # Families and other adults are important influences in children's social-emotional development. Therefore, an intervention model designed to support social-emotional development must consider the multiple spheres of influe…	385	488	MUST	COCA:2006:ACAD	ACAD	14	SchoolPsych	vb	NA	NA	root	nec	ws	gsn	circ	NA	pres	sim	presvb	NA	n	act	dyn	CONSIDER	n	3s	n	n	y	maincl	NA	decl	pos	NA	n	n	n	noef	ass	ass	dir	NA	initial	THEREFORE
, the experts say, to get a decent amount of sleep while you do that. JUDY-WOODRUFF: If they're having these kinds of shifts, is anybody arguing they should n't? ALAN-LEVIN: Well, the National Transportation Safety Board, for many years, has issued recommendations and has argued that they shouldn't. The most recent series of recommendations came in 2007. But it's)%>-- the FAA to date has n't -- h…	386	371	SHOULD	COCA:2011:SPOK	SPOK	14	PBS_NewsHour	neg.co	NA	NA	root	nec	ns	subjextn	rul	n	pres	sim	NA	NA	NA	NA	NA	NA	n	3p	y	n	n	sub.nomcl	ARGUE	NA	notc	negprop	n	n	n	noef	ass	ass	dir	NA	NA	NA
, the interdependence of the linguistic systems of bilingual children may manifest itself as transfer, whereby a linguistic structure from language A is applied to language B, such as substituting the voiceless post-alveolar affricate for the homorganic fricative in English by Spanish-English bilinguals. # The interdependence of the two linguistic systems of bilinguals may also affect their rate …	387	328	MAY	COCA:2013:ACAD	ACAD	14	LangSpeechHearing	adv	NA	NA	ep	pos	ws	ep	disint	NA	pres	sim	presvb	NA	n	act	dyn	AFFECT	n	3s	n	n	n	maincl	NA	decl	pos	NA	n	n	n	noef	ass	ass	dir	NA	m	ALSO
, the least technology, and the least clutter in the operating room. The other day, while I was doing a quick carpal-tunnel operation using only a few simple instruments, I had two thoughts. The first was that this procedure is one of my favorites. The second was that I must be getting old. When I was a resident, one of my attending surgeons)%>was revered for his minimalist style and slick surgic…	388	58	MUST	COCA:2008:MAG	MAG	13	TechReview	vb	NA	NA	ep	nec	ws	ep	disint	NA	pastsub	sim	presvb	NA	y	act	dyn	GET	n	1s	y	n	n	sub.nomcl	BE	NA	pos	NA	n	n	n	noef	ass	ass	dir	NA	NA	NA
, the pleasures of a several nights of hilarious debauchery, and multiple near-death experiences. " While conceding that women had impressively met the physical challenges of Army's " very, very difficult " Ranger School, as he put it, Mr. Newbold argued that fighting in combat is something only men can understand. '' The characteristics that produce uncommon value as a common virtue are not)%>ph…	389	43	CAN	COCA:2015:NEWS	NEWS	14	CSMonitor	vb	NA	NA	root	pos	ns	ab	subjint	n	pres	sim	presvb	NA	n	act	st	UNDERSTAND	n	3p	y	n	y	sub.relcl	NA	NA	pos	NA	n	n	n	noef	ass	ass	dir	NA	NA	NA
, the Republican nominee will have a pretty good indication of the level of change the country wants and how we could do it, and I think you'll see us campaigning- and I notice that Congressman Gephardt, the Democratic minority leader, has come out and also said he thinks that we ought to have very dramatic change in the tax code. COKIE ROBERTS: Mr. Speaker , I want to ask you a couple of foreign…	390	286	OUGHT TO	COCA:1995:SPOK	SPOK	14	ABC_Brinkley	vb	n	NA	root	nec	ns	subjextn	disint	n	pres	sim	presvb	NA	n	act	st	HAVE	n	1p	y	n	n	sub.nomcl	THINK	NA	pos	NA	n	n	n	noef	ass	ass	dir	NA	NA	NA
, the researchers did not design the study in a way that would definitively answer this critical question. When evaluating studies in a systematic review, reviewers must extract sufficient information from each study to determine if it is scientifically capable of answering this question. Although there is general agreement that scientific merit should be determined prior to drawing conclusions a…	391	272	SHOULD	COCA:2012:ACAD	ACAD	14	EducationTreatment	vb	NA	NA	root	nec	ws	gsn	rul	NA	pres	sim	presvb	NA	n	pas	dyn	DETERMINE	n	3s	n	n	n	sub.nomcl	THERE IS AGREEMENT THAT	NA	pos	NA	n	n	n	noef	ass	ass	dir	NA	NA	NA
, the same expression that Francis uses when expressing his desire for kerygmatic bishops and witnesses to the risen Christ. When discussing the mission to lead, Benedict specifies by using diakonia, the service of charity, which Francis also prioritizes. This was an aspect that was '' outsourced, '' we could say, as an episcopal task, even though it is just as essential as)%>the other tasks. Ben…	392	79	COULD	COCA:2015:MAG	MAG	13	America	vb	NA	NA	root	pos	ws	gsp	circ	NA	pres	sim	presvb	NA	n	act	dyn	SAY	n	1p	y	y	n	maincl	NA	decl	pos	NA	n	n	n	noef	hedperf	hedperf.ass	dir	NA	NA	NA
, the seagulls, you got used to the Light Brigade after a while. On dreary days he had almost learned not to begrudge the company. Why do you see the speck in your neighbor's eye but not notice the log in your own eye? # '' Henry thinks the beacon could operate much like such a room, '' Suzanne said, as if this was)%>some major and astounding discovery. Her enthusiasm struck him as serious and au…	393	217	COULD	COCA:2014:FIC	FIC	13	Bk:Acceptance	vb	NA	NA	root	pos	ws	gsp	disint	NA	pres	sim	presvb	NA	n	act	dyn	OPERATE	n	3s	n	n	n	sub.nomcl	THINK	NA	pos	NA	n	n	n	noef	exp	exp	indir	NA	NA	NA
, then a used bookstore and a shop for big sizes. At Green Lake a mist hung in the trees, and water dripped from the leaves. The lake held the aftermath of long rain: a hesitant , vulnerable sheen, as if it were waiting, though Glenna knew a lake couldn't wait for anything. A few people walked on the path, some with)%>dogs on leashes, a man with a pet ferret, a woman with a lovebird on her should…	394	124	COULD	COCA:2014:FIC	FIC	13	SouthernRev	neg.vb	NA	NA	root	pos	ws	gsp	circ	NA	pres	sim	presvb	NA	n	act	st	WAIT	n	3s	n	n	n	sub.nomcl	KNOW	NA	notc	negmod	n	n	n	noef	ass	ass	dir	NA	NA	NA
, then it's a drug. Perhaps BHRT is a better drug and the way it is prescribed is better than the random handing-out of normal HRT by stressed-out GPs. Perhaps it is a better way, but to argue for access to these better drugs, or more information, we would have to think politically about the menopause and it is hard to be political about things that embarrass us. # Indeed, we may begin to questio…	395	264	HAVE TO	COCA:2015:MAG	MAG	13	NewStatesman	vb	n	pastfut	root	nec	ns	subjextn	disint	n	fut	sim	presvb	NA	n	act	dyn	THINK ABOUT	n	1p	y	y	y	maincl	NA	decl	pos	NA	n	n	n	noef	ass	ass	dir	NA	ie	POLITICALLY
, then listened. The reassuring thump, thump made her smile. " The baby's heartbeat is strong. " The skin of Libby's belly contracted, and Libby inhaled sharply. Amy patted her. " That was a strong one. '' # Libby bit her lip. '' What should we do? '' # '' Without checking your cervix, I don't know)%>how much time we have. " She watched Libby's face contort again. " It's only been a minute. That …	396	247	SHOULD	COCA:2013:FIC	FIC	13	Bk:RosemaryCottage	subjinv	NA	NA	root	nec	ns	subjextn	circ	n	pres	sim	presvb	NA	n	act	dyn	DO	n	1p	y	y	n	maincl	NA	int	pos	NA	n	n	n	noef	dir	dir.ireq	dir	NA	NA	NA
, then turned eyes grown suddenly and deeply unhappy on Lord John. " I can confide in no one! " he said, in a sudden, passionate whisper. He gripped Lord John's arm, with surprising strength. '' It may be nothing, nothing at all. But I must have help. '' '' You shall have it, if it be in my)%>power to give. " Grey's fingers touched the hand that grasped his arm; Gerald's fingers were cold. Quarry…	397	12	MUST	COCA:2007:FIC	FIC	13	Bk:LordJohnHand	vb	NA	NA	root	nec	ws	gsn	disint	NA	pres	sim	presvb	NA	n	act	st	HAVE	n	1s	y	n	n	maincl	NA	decl	pos	NA	n	n	n	noef	dir	dir.areq	indir	NA	NA	NA
, there are intense moments when truths about a significant other emerge, helping you heal or move on. An inspiring life event may prompt you to courageously and willingly commit to a new cause. Cancer June 22-July 23 Be careful how you deal with coworkers around the 6th; otherwise, you may be seen as overly ambitious. If you are flexible and subtle, you will)%>influence others for the better. Th…	398	495	MAY	COCA:2009:MAG	MAG	13	HarpersBazaar	vb	NA	NA	ep	pos	ws	ep	disint	NA	pres	sim	presvb	NA	n	pas	st	SEE	n	2p	y	n	n	maincl	NA	decl	pos	NA	n	n	n	noef	ass	ass	dir	NA	initial	OTHERWISE
, there are serious, unrelenting problems. The simplicity that allowed the westward expansion to proceed as it did is gone forever. Most westerners realize that and work from new premises. Put broadly, most people in the West believe that the extractive development of western resources is necessary and desirable but ought to be balanced, prudent, and reasonably stable and that precautions ought t…	399	424	OUGHT TO	COCA:1990:ACAD	ACAD	14	Environment	vb	n	NA	root	nec	ws	gsn	disint	NA	pres	sim	presvb	NA	n	act	st	BE	n	3s	n	n	n	maincl	NA	decl	pos	NA	n	n	n	noef	ass	ass	dir	NA	NA	NA
, there have been setbacks, there have been mistakes, the enemy is stronger than we would have hoped. But one political party can then take a somewhat defeatist attitude and say it's tough, I guess we have to pull back. The other can say it's tough, we have to redouble our efforts. And that struck me as the contrast between Newt and Joe Biden. WILLIAMS: So in other words, Bill, what you're saying…	400	204	HAVE TO	COCA:2006:SPOK	SPOK	14	Fox_Sunday	vb	n	pres	root	nec	ns	subjextn	disint	n	pres	sim	presvb	NA	n	act	dyn	REDOUBLE	n	1p	y	y	n	maincl	NA	decl	pos	NA	n	n	n	noef	ass	ass	dir	NA	NA	NA
, there is a small fee. LESLEY-STAHL# How much money annually does Safaricom make from M-PESA in Kenya? BOB-COLLYMORE# A quarter of a billion dollars. LESLEY-STAHL# A quarter of a billion dollars? BOB-COLLYMORE# Yeah. You don't have to be greedy to be successful. LESLEY-STAHL- (voic# And you can be successful if you don't have to build thousands of branches, and pay)%>thousands of tellers. Actual…	401	44	CAN	COCA:2015:SPOK	SPOK	14	CBS	vb	NA	NA	root	pos	ws	gsp	circ	NA	pres	sim	presvb	NA	n	act	st	BE	n	2s	y	n	y	maincl	NA	decl	pos	NA	n	n	n	noef	ass	ass	dir	NA	NA	NA
, therefore, the teacher is feeling like, why are you disturbing the rest of the class? And they're just -- their bodies just do n't want to sit still. And that one of the challenges is that teachers say, be still, and their brain is saying, I need to move. And that's a hard battle right there. That's a battle. As an educator, when I'm in a meeting for longer than an hour, I need to move. So, for…	402	88	NEED TO	COCA:2014:SPOK	SPOK	14	PBS	vb	n	pres	root	nec	ns	subjintn	subjint	n	pres	sim	presvb	NA	n	act	dyn	MOVE	n	1s	y	y	n	maincl	NA	decl	pos	NA	n	n	n	noef	ass	ass	dir	NA	NA	NA
, they have had the votes to make these tax cuts permanent. Lets understand, last year they passed a tax cut over the next 10 years, thats in place, thats law of the land. Now they come back and waste time, frankly, on the floor, that we ought to be spending on things like prescription drugs, saying that 10 years from now , the estate tax will not be sunseted, and it will be a permanent tax cut, …	403	343	OUGHT TO	COCA:2002:SPOK	SPOK	14	Fox_Cavuto	vb	n	NA	root	nec	ns	subjextn	disint	n	pres	sim	presvb	NA	y	act	dyn	SPEND	n	1p	y	y	y	sub.relcl	NA	NA	pos	NA	n	n	n	noef	exp	exp	indir	NA	NA	NA
, they might believe that these types of behaviors are truly important. Based on these perceived values, children will often choose to meet the expectations of the coach either in a sportsmanlike or unsportsmanlike way, depending on which they perceive is more valuable. # Theory suggests that children's sportsmanship behaviors should be correlated to those of the spectators (who are primarily par…	404	459	SHOULD	COCA:2009:ACAD	ACAD	14	SportBehavior	vb	NA	NA	root	nec	ws	gsn	circ	NA	pres	sim	presvb	NA	n	pas	st	CORRELATE	n	3p	n	n	n	sub.nomcl	SUGGEST	NA	pos	NA	n	n	n	noef	ass	ass	dir	NA	NA	NA
, they're Catholic, they're moderate, and they're independent. They all sound like Hillary Clinton voters to me. MR-TODD: A lot of them were. Nearly half of them supported Clinton in the primaries . In effect, we even slice it even more. We -- we're able to take a look at what our pollsters call '' Hillary not Obama, ''and it's this group of voters that supported Clinton in the primaries, are not…	405	118	BE ABLE TO	COCA:2008:SPOK	SPOK	14	NBC_MeetPress	vb	NA	pres	root	pos	ns	op	circ	n	pres	sim	presvb	NA	n	act	dyn	TAKE A LOOK AT	n	1p	y	y	n	maincl	NA	decl	pos	NA	n	n	n	noef	ass	ass	dir	NA	NA	NA
, this is not really the Kurds' fight, " says the Kurdish analyst. " This is Maliki's fight. He's been defiant toward the KRG; if he wants to fight, go and fight himself. '' KRG President Masoud Barzani said in a statement that Kurdish peshmerga forces should not go beyond the disputed territories, which are Kurdish-dominated. A senior Kurdish official)%>told Rudaw that launching a fight against …	406	463	SHOULD	COCA:2014:NEWS	NEWS	14	CSMonitor	neg.vb	NA	NA	root	nec	ns	subjextn	disint	n	pastsub	sim	presvb	NA	n	act	dyn	GO	n	3p	y	y	y	sub.nomcl	SAY	NA	not	negprop	n	n	n	noef	ass	ass	dir	NA	NA	NA
, though, is it not? This morning- Mr. BOND: Yes. Mr. DONALDSON: -Clinton and Gore are out, working hard, and you, the Chairman of the Republican National Committee, are on vacation . Mr. BOND: No, Sam, that's just not true and you ought to get your facts right. I live here. This is where I live with my friends and my family, in a little town of 1,200 people, outside the Beltway and I'm glad to b…	407	191	OUGHT TO	COCA:1992:SPOK	SPOK	14	ABC_Brinkley	vb	n	NA	root	nec	ns	subjextn	disint	n	pres	sim	presvb	NA	n	act	dyn	GET RIGHT	n	2s	y	y	n	maincl	NA	decl	pos	NA	n	n	n	noef	exp	exp	indir	NA	e	RIGHT
, tmcgheedenverpost.com or twitter.com/dpmcghee 6928 BOULDER A case of shingles that morphed into pneumonia and left him in a wheelchair for months gave Alan O'Hashi, 60, a telling preview of what his life could be like after age 80. After a harrowing year that started with six weeks)%>in the hospital, O'Hashi, a documentary filmmaker, is eager to talk about the changes that Boulder's Silver Sage…	408	457	COULD	COCA:2015:NEWS	NEWS	14	Denver	vb	NA	NA	ep	pos	ws	ep	disint	NA	pres	pos	presvb	NA	n	act	st	BE	n	3s	n	n	n	sub.nomcl	A PREVIEW OF	NA	pos	NA	n	n	n	noef	ass	ass	dir	NA	NA	NA
, to be an intellectual woman of her generation and grow up with this enormous identity, but it was an identity founded on belief that she could n't sustain. She was violently secular. She loved culture and she loved books and all sorts of things that Jews care for, but she couldn't believe in the Jewish god or any god. And you know, she)%>felt terrible about it, and she felt enraged that other p…	409	453	COULD	COCA:2013:SPOK	SPOK	14	NPR	neg.vb	NA	NA	root	pos	ns	ab	subjint	n	past	sim	presvb	NA	n	act	st	BELIEVE	n	3s	y	n	n	maincl	NA	decl	notc	negmod	n	n	n	str	ass	ass	dir	NA	NA	NA
, to determine the reason for the quarantine, and then to either make the ship go away, destroy it, or to release it from quarantine. # Nyquist looked up the name of the administrator and then smiled. He had gotten his second break in this case. He wouldn't have to go through piles of rules and regulations to talk to some bureaucrat. He knew the bureaucrat. # He had saved her life once. # It was …	410	69	HAVE TO	COCA:2011:FIC	FIC	13	Analog	vb	n	pastfut	root	nec	ns	subjextn	circ	n	fut	sim	presvb	NA	n	act	dyn	GO THROUGH	n	3s	y	y	n	maincl	NA	decl	notc	negmod	n	n	n	noef	dir	dir.ord	dir	NA	NA	NA
, to her training at the House of Black and White in Braavos, to her triumphant and vengeful return to the Seven Kingdoms, it's remarkable just how much Arya has gone through. # Yes, obviously I cried throughout that whole thing. Right from the get-go, too. I ca n't see Ned Stark with one of his children and not lose it, buther time with the Hound kills me too. I'm not surprised I reacted this wa…	411	45	CAN	COCA:2017:MAG	MAG	13	Nerdist	neg.vb	NA	NA	root	pos	ws	gsp	circ	NA	pres	sim	presvb	NA	n	act	st	SEE	n	1s	y	n	n	maincl	NA	decl	notc	negmod	n	n	n	noef	ass	ass	dir	NA	NA	NA
, too. We went to see the sandstone temples ornamented with jaguars and serpents and rows of skulls and starflowers, and to visit the pyramids that hide deep caves no one has yet penetrated. We stood looking at a curved stone sacrifice table and were suddenly drawn to each other. We ought to make love on that slab, we said. We were young. I remember how we looked at each other sadly. Instead we w…	412	270	OUGHT TO	COCA:1990:FIC	FIC	13	Triquarterly	vb	n	NA	root	nec	ns	subjextn	disint	n	pres	sim	presvb	NA	n	act	dyn	MAKE	n	1p	y	y	n	maincl	NA	decl	pos	NA	n	n	n	noef	ass	ass	dir	NA	NA	NA
, tree-spotted hills ahead and to her right. " How was it made? Who made it? " Larth frowned. The question made no sense to him. A place was never made, it simply was . Small features might change over time. Uprooted by a storm, a tree might fall into the river. A boulder might decide to tumble down the hillside.)%>The numina that animated all things went about reshaping the landscape from day to…	413	396	MIGHT	COCA:2007:FIC	FIC	13	Bk:Roma	vb	NA	NA	ep	pos	ws	ep	disint	NA	pres	sim	presvb	NA	n	act	dyn	FALL INTO	n	3s	n	n	n	maincl	NA	decl	pos	NA	n	n	n	noef	ass	ass	dir	NA	NA	NA
, wanting joy, longing for life, and all he could offer was a formula he'd pumped out seven times this month alone on stages across the country. As his head remained down, a smattering of applause floated toward him. They probably thought he was praying for them. He should be. The words of the song he'd just sung were strong and true)%>and eloquent. Many would be moved by them. But to him they'd …	414	31	SHOULD	COCA:2012:FIC	FIC	13	Bk:SoulsGate	vb	NA	NA	root	nec	ns	subjextn	circ	n	pres	sim	NA	NA	NA	NA	NA	NA	n	3s	y	y	n	maincl	NA	decl	pos	NA	n	n	n	noef	ass	ass	dir	NA	NA	NA
, was named editor in chief in 1991. He fostered authoritative writers like the executive editor Bridget Foley, whose opinions are scrutinized by fashion insiders. WWD focused on business scoops. And coverage of socialites was replaced with photographs of celebrities wearing designer brands. '' Whoever owns Women's Wear Daily needs to understand the importance of who reads it, '' said Mr. McCarth…	415	287	NEED TO	COCA:2014:NEWS	NEWS	14	NYTimes	vb	n	pres	root	nec	ns	subjextn	disint	n	pres	sim	presvb	NA	n	act	st	UNDERSTAND	n	3s	y	n	n	maincl	NA	decl	pos	NA	n	n	n	noef	ass	ass	dir	NA	NA	NA
, We have to understand the insights and understandings in traditional societies and apply these.' The world is balanced on the back of a large turtle, and it's clitoridectomies for all the girls. And, said the senator: We have to commit ourselves to freedom. But freedom also has to be sustainable freedom.' # I don't know what sustainable freedom' is, but sustainable development' was the Earth Su…	416	276	HAVE TO	COCA:1993:MAG	MAG	13	RollingStone	vb	n	pres	root	nec	ws	gsn	disint	NA	pres	sim	presvb	NA	n	act	st	BE	n	3s	n	n	n	maincl	NA	decl	pos	NA	n	n	n	noef	ass	ass	dir	NA	im	ALSO
, we send trips- troops on ships, rather, within about, what, 500 yards or maybe it was five miles? And then we withdraw the ships. We talk tough against Cedras, we talk tough about restoring Aristide, and then we don't do anything. So the President ought to make up his mind very quickly whether he wants to do something- BARBARA WALTERS : Yeah, but do you send force in just to show that you're do…	417	449	OUGHT TO	COCA:1994:SPOK	SPOK	14	ABC_Brinkley	vb	n	NA	root	nec	ns	subjextn	circ	n	pres	sim	presvb	NA	n	act	dyn	MAKE UP	n	3s	y	y	n	maincl	NA	decl	pos	NA	n	n	n	noef	ass	ass	dir	NA	e	VERY QUICKLY
, we suddenly decide that we have a different congressman than we thought. Not clear yet, but Hoffman is doing better than people thought. He's getting more votes, and as the absentee returns come in , it keeps getting narrower and narrower. So you know, could -- people ought to stay tuned in. It could be interesting in a week. VAN-SUSTEREN: All right, as usual, I'm one beat off on this. I'll tel…	418	391	OUGHT TO	COCA:2009:SPOK	SPOK	14	Fox_Susteren	vb	n	NA	root	nec	ns	subjextn	circ	n	pres	sim	presvb	NA	n	act	dyn	STAY	n	3p	y	y	y	maincl	NA	decl	pos	NA	n	n	n	noef	ass	ass	dir	NA	NA	NA
, we're implying that this is not a small group, and that is the debate. " # " It's baffling, " said Bernard Rimland, a pioneering research psychologist in San Diego, who worked on the movie '' Rainman '' as a psychological consultant. Rimland believes the technique ought to be given '' a good solid try '' with anyone labelled autistic, but he's worried about the current enthusiasm. " On the one …	419	59	OUGHT TO	COCA:1993:NEWS	NEWS	14	SanFranChron	vb	n	NA	root	nec	ws	gsn	disint	NA	pres	sim	presvb	NA	n	pas	dyn	GIVE	n	3s	n	n	n	sub.nomcl	BELIEVE	NA	pos	NA	n	n	n	noef	ass	ass	dir	NA	NA	NA
, when it was dark, I saw he was stiU on the balcony, and I went out to join him. He put his fingers to his lips. I foUowed his gaze to a fit room on the first fioor of Torino. In the amber glare of a bedroom Hght you could see through drawn curtains a young woman moving about. '' Keep on watching,)%>" Xerx said. Now I noticed there were two young girls, both in nighties, talking to each other, c…	420	234	COULD	COCA:2013:FIC	FIC	13	Raritan	vb	NA	NA	root	pos	ws	gsp	circ	NA	past	sim	presvb	NA	n	act	st	SEE	n	2s	y	n	y	maincl	NA	decl	pos	NA	n	n	n	noef	ass	ass	dir	NA	NA	NA
, which " works with organizations around the world to develop strategies, guidelines, and resources to help make the web accessible to people with disabilities. " Nevertheless, Phipps and Kelly (2006) put forward an holistic approach to the design of e-learning and argued that simply following the WAI guidelines may not be sufficient. The results presented here could be argued both ways. It)%>se…	421	373	MAY	COCA:2008:ACAD	ACAD	14	VisualImpair	neg.vb	NA	NA	ep	pos	ws	ep	disint	NA	pastsub	sim	presvb	NA	n	act	st	BE	n	3s	n	n	n	sub.nomcl	ARGUE	NA	not	negprop	n	n	n	noef	ass	ass	dir	NA	NA	NA
, which came into effect on 31 March will require nurses to maintain their knowledge and skills in order to practise effectively and safely. Adherence to the Code will be a fundamental part of professional revalidation, which comes into force at the end of this year, without which nurses will not be able to renew their registration. # In order to revalidate, nurses will need togather feedback to …	422	403	BE ABLE TO	COCA:2015:ACAD	ACAD	14	PracticeNurse	vb	NA	fut	root	pos	ns	perm	rul	n	fut	sim	presvb	NA	n	act	dyn	RENEW	n	3p	y	y	y	sub.relcl	NA	NA	not	negmod	n	n	n	noef	ass	ass	dir	NA	NA	NA
, who is a 38-year-old high school football coach, was on " Good Morning America " this morning. And he told Ashleigh Banfield he's not happy to see that Casey is walking out of jail a free woman on Sunday. Watch. (BEGIN-VIDEO-CLIP) UNIDENTIFIED-MALE: We had this overwhelming sense that we may have let people down. ASHLEIGH-BANFIELD,: When you were finally able to watch)%>TV and you found out Cas…	423	487	MAY	COCA:2011:SPOK	SPOK	14	CNN_Showbiz	vb	NA	NA	ep	pos	ws	ep	disint	NA	pres	ant	pfvbnc	ant	n	act	dyn	LET DOWN	n	1p	y	y	n	sub.relcl	NA	NA	pos	NA	n	n	n	noef	ass	ass	dir	NA	NA	NA
, with his family surrounding him, his doctors removed his breathing tube. Once he had taken his last, labored breath, our team rushed him into the operating room. We were just in time to recover his kidneys and liver. In the midst of their heartbreak, his family was able to find some comfort in the idea that their husband and father had died heroically, saving three people's lives. # Unfortunate…	424	298	BE ABLE TO	COCA:2015:MAG	MAG	13	Atlantic	vb	NA	pret	root	pos	ws	gsp	circ	NA	past	sim	presvb	NA	n	act	st	FIND	n	3s	y	y	n	maincl	NA	decl	pos	NA	n	n	n	noef	ass	ass	dir	NA	NA	NA
, with little divide socially; we knew we'd find different jobs, no big deal. # The " smartest " kids do n't necessarily do four-year college. Challenging kids to do their best in any career is what matters. # Margy Robertson, Monte Vista # Our politicians say everyone must have a bachelor's degree to be successful and make it sound like anyone who)%>does n't is second-class. Ridiculous! We need …	425	416	MUST	COCA:2011:NEWS	NEWS	14	Denver	vb	NA	NA	root	nec	ns	subjextn	cond	n	pres	sim	presvb	NA	n	act	st	HAVE	n	3s	y	n	n	sub.nomcl	SAY	NA	pos	NA	n	n	n	noef	ass	ass	dir	NA	NA	NA
, with support from appropriately trained people, skilled in communication and cultural awareness and able to access disadvantaged communities, can also provide a way forward. They can help provide the care, support and follow-up of knowledge and life experience and are able to target information with sensitivity and respect. They may also be able to deliver risk assessments and reviews within th…	426	396	MAY	COCA:2012:ACAD	ACAD	14	PracticeNurse	adv	NA	NA	ep	pos	ws	ep	disint	NA	pres	sim	presvb	NA	n	act	st	BE ABLE TO	n	3p	y	n	y	maincl	NA	decl	pos	NA	n	n	n	noef	ass	ass	dir	NA	m	ALSO
, worshipped, and debated - amid hefty clashes of civilizations and belief in Europe - profoundly influenced their sensibilities in ways that have not been widely recognized. # The Pilgrims - unlike British Puritans who wanted to turn Massachusetts into a theocracy - sharply advocated church-state separation. They heretically believed that women should be allowed to speak in church. They were far…	427	128	SHOULD	COCA:2009:NEWS	NEWS	14	CSMonitor	vb	NA	NA	root	nec	ws	gsn	disint	NA	pastsub	sim	presvb	NA	n	pas	st	ALLOW	n	3p	y	n	y	sub.nomcl	BELIEVE	NA	pos	NA	n	n	n	noef	ass	ass	dir	NA	NA	NA
, you always remember that stuff! " " three..:. " " Well, how do I -- " " Wait, wait, I got it! " I grabbed the TimeTroller and dialed a date and destination. '' two.... '' I grabbed my wife as tight as I could. '' One! '' My last thought before the guns fired was how long)%>it had been since I'd held Karen, really held her close. I honestly could n't remember. " Second of all, uppercut? " Karen …	428	324	COULD	COCA:2015:FIC	FIC	13	FantasySciFi	co	NA	NA	root	pos	ns	ab	subjint	n	past	sim	NA	NA	NA	NA	NA	NA	n	1s	y	y	n	sub.compcl	NA	NA	pos	NA	n	n	n	noef	ass	ass	dir	NA	NA	NA
, you are in. If not, you've out. So how do we calculate it? Let's take a look at CNN's poll of polls where we take several recent popular polls that we know are solid when we average them. And if you look at that, you can see that three candidates her are in double digits - Donald Trump, Jeb Bush)%>and Scott Walker. They will all certainly be in. Behind them you get Marco Rubio, Randal Paul, Ted…	429	46	CAN	COCA:2015:SPOK	SPOK	14	CNN	vb	NA	NA	root	pos	ns	op	circ	NA	pres	sim	presvb	NA	n	act	st	SEE	n	2p	y	n	n	maincl	NA	decl	pos	NA	n	n	n	noef	ass	ass	dir	NA	NA	NA
, you could see the difference. " # Not long after his stunning triumph, Woods sat with his friend and Orlando neighbor, Mark O'Meara, reviewing a tape of the final round. Peter Kostis, a widely regarded teacher and golf analyst for CBS Sports, said O'Meara told Woods he needed to make some changes. # '' Tiger called Butch [ Harmon, his longtime coach ] that night, " Kostis said. " He knew he'd g…	430	320	NEED TO	COCA:2002:NEWS	NEWS	14	WashPost	vb	n	pret	root	nec	ns	subjextn	circ	n	pastsub	sim	presvb	NA	n	act	dyn	MAKE	n	3s	y	y	n	sub.nomcl	TELL	NA	pos	NA	n	n	n	noef	ass	ass	dir	NA	NA	NA
, you first design a curriculum and then you test it, but there is no opposition to a voluntary test. Mr. WILL: But we have, through national use of certain textbooks and through the SAT tests , we have something like a consensus, do we not, on what people ought to know at the end of 12 years? Mr. PROPHET: Well, for the SAT, you have a consensus of what kids ought to know to succeed in college. O…	431	123	OUGHT TO	COCA:1991:SPOK	SPOK	14	ABC_Brinkley	vb	n	NA	root	nec	ns	subjextn	circ	n	pres	sim	presvb	NA	n	act	st	KNOW	n	3p	y	n	y	sub.nomcl	HAVE A CONSENSUS ON	NA	pos	NA	n	n	n	noef	dir	dir.ireq	dir	NA	NA	NA
, you know - it's difficult in some ways for the mind to differentiate between movies and real life in a lot of cases, and - particularly action movies, today, are so good at being realistic . And this movie was so realistic that it just overwhelmed me, and I had to get out of the theater as soon as possible. DAVE-DAVIES# And it was after that you began having terrible nightmares? DAVID-MORRIS# Y…	432	404	HAVE TO	COCA:2015:SPOK	SPOK	14	NPR	vb	n	pret	root	nec	ns	subjextn	circ	y	past	sim	presvb	NA	n	act	dyn	GET OUT	n	1s	y	y	n	maincl	NA	decl	pos	NA	n	n	n	noef	ass	ass	indir	NA	NA	NA
, you know, the breakdown of what the character is and what the story is. But in animation, they do n't often send you the whole script, which is really weird. So you just kind of show up, and you've got some sort of idea, and they might send you some artwork so you can see what your character looks like. And)%>in that particular case, I got the wrong stuff, or it did n't get sent to me. So I get…	433	493	MIGHT	COCA:2011:SPOK	SPOK	14	NPR_FreshAir	vb	NA	NA	ep	pos	ws	ep	disint	NA	pres	sim	presvb	NA	n	act	dyn	SEND	n	3p	y	y	y	maincl	NA	decl	pos	NA	n	n	n	noef	ass	ass	dir	NA	NA	NA
, you know. I did n't want to be in full skirts and cowboy boots and cowboy hat. GROSS: Why did you want to change the look? Ms-JACKSON: I do n't look good in those things. That was the main thing. (Soundbite-of-laugh) Ms-JACKSON: I've never been able to wear a full skirt, haven't to this day. And the cowboyhats and those little clubby boots, you know. And I just did n't like it. I did n't feel l…	434	197	BE ABLE TO	COCA:2003:SPOK	SPOK	14	NPR_FreshAir	vb	NA	prespf	root	pos	ns	ab	subjint	n	pres	sim	presvb	NA	n	act	dyn	WEAR	n	1s	y	y	n	maincl	NA	decl	n.adv	NA	n	n	n	noef	ass	ass	dir	NA	im	NEVER
, you might try one of the grand old giants, such as' Blue Hubbard,' or the splendid vermillion-colored' Rouge Vif D'Etampes.' Also known as' Cinderella' because of its deeply lobed shape ,' Rouge Vif D'Etampes' isn't quite big enough to ride in but can easily feed 20 people. # Pumpkins, which botanically are no different from winter)%>squash, can be delicious, too, but look for the cooking varie…	435	47	CAN	COCA:2014:MAG	MAG	13	MotherEarth	adv	NA	NA	root	pos	ws	gsp	circ	NA	pres	sim	presvb	NA	n	act	st	FEED	n	3s	n	n	y	maincl	NA	decl	pos	NA	n	n	n	noef	ass	ass	dir	NA	m	EASILY
, your physical condition and how cold the water is. Although it would take a long time, you can get hypothermia in 90-degree water. If, however, the temperature is below 50 degrees, your survival time is much shorter. Depending on how cold the water is, survival time might be only minutes after hitting the water. If you're wearing a survival suit)%>and are in a life raft, you may be able to surv…	436	383	MIGHT	COCA:2007:MAG	MAG	13	OutdoorLife	vb	NA	NA	ep	pos	ws	ep	disint	NA	pres	sim	presvb	NA	n	act	st	BE	n	3s	n	n	n	maincl	NA	decl	pos	NA	n	n	n	noef	ass	ass	indir	NA	NA	NA
. " " I can deal with that, when the time comes. " Andrew caught Kazuo's dubious look. " Besides, I'm being open with Alice now, on certain tilings. Emotional tilings. '' His mouth twisted. '' Maybe too honest about some stuff. I'll have to watch diat. '' '' Fine. Now that you've gotten the lesson , here comes the lecture. Just how is what you're doing with Alice different from what those couple …	437	132	HAVE TO	COCA:2009:FIC	FIC	13	Analog	vb	n	fut	root	nec	ns	subjextn	circ	n	fut	sim	presvb	NA	n	act	dyn	WATCH	n	1s	y	y	n	maincl	NA	decl	pos	NA	n	n	n	noef	ass	ass	dir	NA	NA	NA
. " # " Everything is yours, Shirley. " # " The jewelry. And oh, this rug. And anything else -- " # " She left it to you, " Jen said, and Shirley felt accused, not of greed, but of cowardice. # '' You ought to have some things of hers. And I can't -- '' Shirley held out her hand. The heavy silver ring Barbara had bought her in New Mexico was twisted on her thin, large-knuckled finger; she straigh…	438	345	OUGHT TO	COCA:1991:FIC	FIC	13	SouthernRev	vb	n	NA	ep	nec	ws	ep	disint	NA	pres	sim	presvb	NA	n	act	st	HAVE	n	2s	y	n	n	maincl	NA	decl	pos	NA	n	n	n	noef	ass	ass	dir	NA	NA	NA
. " # 14162 The Vault GEMS FROM THE SATURDAY EVENING POST ARCHIVE # The rumpled young man moodily slouched across the room. The left lens of his horn-rimmed glasses was cracked, which must have given him a distorted view of the world. # It also caused him)%>to tilt back his head, as if he wanted to confirm his reputation for arrogance. His enormously thick eyelashes made him look half asleep. Tha…	439	54	MUST	COCA:2015:MAG	MAG	13	SatEvenPost	vb	NA	NA	ep	nec	ws	ep	disint	NA	pres	ant	pfvbnc	ant	n	act	dyn	GIVE	n	3s	n	n	n	sub.relcl	NA	NA	pos	NA	n	n	n	noef	ass	ass	dir	NA	NA	NA
. " # Even so, the losses faced by banks could be steep, raising the question of how many banks will be willing to participate. The government already has made it easier for banks to borrow money and has provided banks with fresh capital. Some banking executives have questioned why they should sell assets at a loss rather than simply hold them and wait for prices to)%>improve. # General Electric'…	440	9	SHOULD	COCA:2009:NEWS	NEWS	14	WashPost	vb	NA	NA	root	nec	ns	subjextn	circ	n	pres	sim	presvb	NA	n	act	dyn	SELL	n	3p	y	y	n	sub.nomcl	QUESTION	NA	pos	NA	n	n	n	noef	ass	ass	dir	NA	NA	NA
. " # The Black Box # Whatever the precise state of the warning signal, the thickness of the vegetation at the crossing, the glare of the setting sun, Hilary Feaster should have had one more chance : the train's horn. # Under CSX's own rules, a train must sound its horn until it enters a crossing. To find out if it indeed)%>had given Hilary sufficient warning, her father asked the railroad for th…	441	137	MUST	COCA:2004:NEWS	NEWS	14	NYTimes	vb	NA	NA	root	nec	ns	subjextn	rul	n	pres	sim	presvb	NA	n	act	dyn	SOUND	n	3s	n	n	y	maincl	NA	decl	pos	NA	n	n	n	noef	ass	ass	dir	NA	NA	NA
. " (n55) This locates it predominantly within what Lonergan would call the scholarly differentiation of consciousness, where the focus is not primarily on systematic meaning but on the common-sense language of another time and place. (n56) De Lubac would often remain content with symbols and paradoxes, and some may regard his tolerance of apparent systematic inconsistencies as one of his strengt…	442	144	MAY	COCA:2008:ACAD	ACAD	14	TheologStud	vb	NA	NA	ep	pos	ws	ep	disint	NA	pres	sim	presvb	NA	n	act	st	REGARD	n	3p	y	n	n	maincl	NA	decl	pos	NA	n	n	n	noef	ass	ass	dir	NA	NA	NA
. " 2. Schedule a meeting with your boss, and then prepare. Outline a presentation about why you feel your current pay is unfair to you as a woman. Include facts and/or numbers that you found in your research, and be clear about your requests. Anticipate issues your boss might raise, and plan your responses. To bolster your confidence, go to wageproject.org)%>and read stories from women who faced…	443	345	MIGHT	COCA:2009:MAG	MAG	13	Redbook	vb	NA	NA	ep	pos	ws	ep	disint	NA	pres	sim	presvb	NA	n	act	dyn	RAISE	n	3s	y	y	n	sub.relcl	NA	NA	pos	NA	n	n	n	noef	ass	ass	dir	NA	NA	NA
. " All the men will want to dance with you. I want to see you in them. " # She sat down next to me on the bed and I helped her put them on, slid the zippers up. '' I don't know. You think I'll be able to dance in these? '' # She loved to dance, had won adance contest once when she was in high school. " Of course, " I said. " You could dance on stilts. " # She stood, used my shoulder to steady he…	444	493	BE ABLE TO	COCA:2005:FIC	FIC	13	IowaRev	vb	NA	fut	root	pos	ns	op	circ	n	fut	sim	presvb	NA	n	act	dyn	DANCE	n	1s	y	y	n	sub.nomcl	THINK	NA	pos	NA	n	n	n	noef	dir	dir.ireq	indir	NA	NA	NA
. " Another reason you might want to hold off on an HDTV is because you wo n't receive enough programming that interests you. HDTV industry consultant Peter Putman advises carefully scrutinizing the HD content available in your area-via cable, satellite, or over the air-so that you know what you'll be able to get and how much you'll have to pay for it. SHOW METHE SHOWS YOUR BEST BET is to check o…	445	448	BE ABLE TO	COCA:2006:MAG	MAG	13	PCWorld	vb	NA	fut	root	pos	ns	op	circ	n	fut	sim	presvb	NA	n	act	dyn	GET	n	2s	y	n	n	sub.nomcl	KNOW	NA	pos	NA	n	n	n	noef	ass	ass	dir	NA	NA	NA
. " Bob was standing behind him and had n't known whether his brother was aware of his presence. He stepped across the room and took his jacket from the closet. " I'm going, " he said. '' Where are you going? '' '' Home. '' '' You ca n't drive, Bob. You had too much to drink. '' '' I'm going, " he said again. " What are you going to do? Sit in the apartment by yourself on Thanksgiving? " " I'm no…	446	48	CAN	COCA:2007:FIC	FIC	13	AntiochRev	neg.vb	NA	NA	root	pos	ns	op	circ	NA	pres	sim	presvb	NA	n	act	dyn	DRIVE	n	2s	y	y	n	maincl	NA	decl	notc	negmod	n	n	n	noef	ass	ass	dir	NA	NA	NA
. " Cheryl Sears, 36 office manager and mother of three " Brig Van Osten: " Her thick hair is one shade too light. It makes her skin look red. " Emily Kate Warren: " Her eyebrows need a softer look. '' Clark Hastings: '' Those tapered jeans must go. I can't wait to find her some boot-cut pants with lots of)%>length. " Kristina Deignan: " Her top is big and shapelessshe needs a shirt that fits! " …	447	52	MUST	COCA:2005:MAG	MAG	13	Redbook	vb	NA	NA	ep	nec	ws	ep	disint	NA	pres	sim	presvb	NA	n	act	dyn	GO	n	3p	n	n	n	maincl	NA	decl	pos	NA	n	n	n	noef	ass	ass	dir	NA	NA	NA
. " Do not try to run, " he warned as he kicked the bag toward one the waiting pair. " I believe there is something interesting in the bag. He certainly does n't have it on his person. '' '' Yes, '' the other Sith said. '' We must let Bowelsplitter know that his is not the only egg in the clutch. Others)%>have more right than he who engineered Ripgut's demise. We need to put a claw in that damned…	448	406	MUST	COCA:2008:FIC	FIC	13	Analog	vb	NA	NA	root	nec	ns	subjextn	disint	n	pres	sim	presvb	NA	n	act	st	LET	n	1p	y	n	n	maincl	NA	decl	pos	NA	n	n	n	noef	ass	ass	dir	NA	NA	NA
. " Draper, whose book, " Front Row Seat, " was published by UT Press, calmly presented a slide show before the three other speakers, seated around two small tables, were guided by questions from library director Mark Updegrove. One event burned in his memory. '' I could prepare for a lot of things, '' he said. '' But nothing could)%>have prepared me for Sept. 11, 2001. " With an eye for the hist…	449	218	COULD	COCA:2013:NEWS	NEWS	14	Austin	vb	NA	NA	root	pos	ns	ab	subjint	n	past	sim	presvb	NA	n	act	dyn	PREPARE	n	1s	y	y	n	maincl	NA	decl	pos	NA	n	n	n	noef	ass	ass	dir	NA	NA	NA
. " He had picked up the cloth I had removed from my face, and now began to wring it between his large hands. " Please, signore, please. Help me. " # I took the cloth from him and wiped the remaining lather off my face. '' But what can I do? '' I asked. # The pounding at the door resumed,)%>this time much louder. # " You know so many important people, signore, " he said quickly. " You are educate…	450	49	CAN	COCA:2015:FIC	FIC	13	Bk:FigaroMurders	subjinv	NA	NA	root	pos	ws	gsp	circ	NA	pres	sim	presvb	NA	n	act	dyn	DO	n	1s	y	y	n	maincl	NA	int	pos	NA	n	n	n	noef	dir	dir.ireq	dir	NA	NA	NA
. " He just keeps the process moving. " He recalled a behind-the-scenes fight between House and Senate budget negotiators over a long-stalled effort to build a roughly $20 million science building for Clayton State University. Hill said Riley broke through the gridlock by paying for the construction through bonds. '' We might eventually work it out, '' said Hill. '' But we have to work)%>with him…	451	212	MIGHT	COCA:2014:NEWS	NEWS	14	Atlanta	adv	NA	NA	ep	pos	ws	ep	disint	NA	pres	pos	presvb	NA	n	act	dyn	WORK OUT	n	1p	y	y	n	maincl	NA	decl	pos	NA	n	n	n	noef	ass	ass	dir	NA	m	EVENTUALLY
. " I certainly think that the prime minister raised some valid points. The question to me is: Are we safer because of the deal? Do we prevent Iran from having a nuclear weapon because of the deal, or is there a better alternative? '' He added: '' You ca n't really know until you see what's in the deal. '' 5808 WASHINGTON -- President Obama's top technology adviser cringes when she hears highly e…	452	50	CAN	COCA:2015:NEWS	NEWS	14	NYTimes	neg.adv	NA	NA	ep	pos	ws	ep	disint	NA	pres	sim	presvb	NA	n	act	st	KNOW	n	2s	y	n	y	maincl	NA	decl	notc	negmod	n	n	n	noef	ass	ass	dir	NA	m	REALLY
. " I never knew him. " " You went to school with him. " " Trust me, I was long gone by the time your mother hooked up with him. " " You knew him . Christopher Graham. Chris. '' '' I'm sorry. '' '' I can prove it. '' He wrenched a thin book from his backpack, shoved it)%>into Cap's hands. " You'll see. I marked the page. " Cap crossed his legs, took the Ellison County High School Yearbook into hi…	453	51	CAN	COCA:2014:FIC	FIC	13	FantasySciFi	vb	NA	NA	root	pos	ns	op	circ	n	pres	sim	presvb	NA	n	act	dyn	PROVE	n	1s	y	y	n	maincl	NA	decl	pos	NA	n	n	n	noef	ass	ass	dir	NA	NA	NA
. " I saw glimpses in those games, times where we competed with them.' We were there, I told (her players) at the time,' this is why we're playing those teams . I guaranteed it would help us in the long run. '' # Monarch may have been a semi-surprise in the final four, but won 15 of its final)%>16 games and waxed Highlands Ranch 78-63 - the Falcons had beaten the Coyotes 93-66 - in the semifinals…	454	390	MAY	COCA:2009:NEWS	NEWS	14	Denver	vb	NA	NA	ep	pos	ws	ep	disint	NA	pres	ant	pfvbnc	ant	n	act	st	BE	n	3s	y	n	n	maincl	NA	decl	pos	NA	n	n	n	str	ass	ass	dir	NA	NA	NA
. " I usually try to visualize myself here, just to calm myself down, " Wagner said. Here is the Aliso Viejo Ice Palace, a place that Wagner - an Army brat born in Germany with childhood stops in Alaska, Virginia and the Pacific Northwest, among other places - can finally call home. On a street appropriately named Journey, Wagner has rebuilt her)%>skating at a rink 5,500 miles, two coaching chang…	455	52	CAN	COCA:2013:NEWS	NEWS	14	OrangeCR	adv	NA	NA	root	pos	ns	op	circ	n	pres	sim	presvb	NA	n	act	dyn	CALL	n	3s	y	y	n	sub.relcl	NA	NA	pos	NA	n	n	n	noef	ass	ass	dir	NA	m	FINALLY
. " In relation to other states, US, and Europe, the Gulf has done more than its fair share - much more than has been advertised, " says Abdulkhaleq Abdulla, a UAE professor of political science and commentator. '' But it is clear that we have all failed and must be ashamed - we all must do more and will do more, the Gulf)%>included. " 7159 As the town stirred from its overnight curfew the mornin…	456	33	MUST	COCA:2015:NEWS	NEWS	14	CSMonitor	vb	NA	NA	root	nec	ns	subjextn	disint	n	pres	sim	presvb	NA	n	act	st	BE	n	1p	y	n	n	sub.nomcl	IT IS CLEAR THAT	NA	pos	NA	n	n	n	noef	ass	ass	dir	NA	NA	NA
. " It does n't exist yet. But I have a disk here that will show some of the images I took. It would be a pleasure to show you a few. " Hap said, " I'd like to see them. '' '' There are a couple things I ought to say first, '' March told him. '' I suppose it will take five minutes or so. " Ida smiled again. " That's good. It will give me time to make tea. Tea must steep, you know. " " You've hear…	457	406	OUGHT TO	COCA:2007:FIC	FIC	13	FantasySciFi	vb	n	NA	root	nec	ns	subjextn	disint	n	pres	sim	presvb	NA	n	act	dyn	SAY	n	1s	y	y	n	sub.relcl	NA	NA	pos	NA	n	n	n	noef	hedperf	hedperf.ass	dir	NA	NA	NA
. " It is so much more than that. " Board members tend to assume that their management team is properly handling its duties, said Sarah Jane Rehnborg with the RGK Center for Philanthropy and Community Service. They're often grateful to have leaders willing to work for less money than they might receive in the private sector. They think those managers have the same kind of)%>passion, honesty and d…	458	33	MIGHT	COCA:2013:NEWS	NEWS	14	Austin	vb	NA	NA	root	pos	ws	gsp	circ	NA	pres	sim	presvb	NA	n	act	st	RECEIVE	n	3p	y	n	n	sub.compcl	NA	NA	pos	NA	n	n	n	noef	ass	ass	dir	NA	NA	NA
. " It was an easy yes for me, " said the 68-year-old Shadyside resident who sold Douglas Oil & Gas Co. to drilling industry giant Rex Energy in 2007. Giving circles typically have involved friends meeting over drinks and food in each other's living rooms to discuss what charitable causes they should support. But the model has evolved into one that some foundations are using to)%>assemble groups …	459	469	SHOULD	COCA:2013:NEWS	NEWS	14	Pittsburgh	vb	NA	NA	root	nec	ns	subjextn	circ	n	pres	sim	presvb	NA	n	act	dyn	SUPPORT	n	3p	y	y	y	sub.relcl	NA	NA	pos	NA	n	n	n	noef	ass	ass	dir	NA	NA	NA
. " Lie still and I'll get you something, " the nurse said. Blood stained the sheets. A bandage stretched across her wound. Vicki was afraid to look at it. " You're lucky , '' the nurse said. '' Didn't hit any vitals. But we had to stitch you up and give you a shot for infection. That was a pretty rusty shank. " The nurse left as Mrs. Weems came in the room. She was a large woman whose presence w…	460	431	HAVE TO	COCA:2000:FIC	FIC	13	BkSF:DeathStrike	vb	n	pret	root	nec	ns	subjextn	circ	y	past	sim	presvb	NA	n	act	dyn	STITCH UP	n	1p	y	y	n	maincl	NA	decl	pos	NA	n	n	n	noef	ass	ass	dir	NA	NA	NA
. " No one will stop me, " he wrote. " I will get out of Miami and into Gainesville, and I will get her back. " ERIKA-FRIMAN# I just was kinda like, oh, my God, what are we going to do? Should we tell him? Should we not tell him? Or should we just live our lives and kind of)%>, if he sees us or meets us or something, we will worry about it then. MATT-GUTMAN# (Voiceover) " 20/20 " obtained that jo…	461	188	SHOULD	COCA:2015:SPOK	SPOK	14	ABC	subjinv	NA	NA	root	nec	ns	subjextn	circ	n	pres	sim	presvb	NA	n	act	dyn	TELL	n	1p	y	y	n	maincl	NA	int	not	negprop	n	n	n	noef	ass	ass	indir	NA	NA	NA
. " So, once you get money, you're going to spend it. I was like, I'm going to take my friends to dinner! Check's on me! "' In matters of beauty, less is more. This one took a while. First, Aniston had to pass through a too-muchmakeup phase that was encouraged by her model mom. '' My mother was someone who would say, Jennifer, please-before you go to the market, would you please put your eyes on.…	462	359	HAVE TO	COCA:1998:MAG	MAG	13	Redbook	vb	n	pret	root	nec	ns	subjextn	rul	y	past	sim	presvb	NA	n	act	dyn	PASS THROUGH	n	3s	y	n	n	maincl	NA	decl	pos	NA	n	n	n	noef	ass	ass	dir	NA	initial	FIRST
. " Tell me ahout it. " He yanked a fencepost from the ground. " All this legal stuff, it freaks me out. " " More than narcos chasing you around the hills? " " At least it was blatant violence, '' said Leggo. '' Plus, I could see them coming. But this? You should be like me. Brew,)%>and get off the grid. If they ca n't find you, they ca n't sue you. " A tinny chorus of bhangra burst from his jack…	463	25	COULD	COCA:2013:FIC	FIC	13	FantasySciFi	vb	NA	NA	root	pos	ws	gsp	circ	NA	past	sim	presvb	NA	n	act	st	SEE	n	1s	y	n	n	maincl	NA	decl	pos	NA	n	n	n	noef	ass	ass	dir	NA	initial	PLUS
. " That woman in there is a saint, you know. A freakin' saint. " He stood up and paced the room till he stood directly in front of Dominic. # " Let me tell you something else, '' Marc said; he was the kind of man who needed to silence a room before speaking to it. He pointed at Dominic's chest with his index finger. " Her whole life, she did nothing but sacrifice herself for her children, for me…	464	369	NEED TO	COCA:2012:FIC	FIC	13	Bk:VariationsNovel	vb	n	pret	root	nec	ns	subjintn	subjint	n	past	sim	presvb	NA	n	act	dyn	SILENCE	n	3s	y	y	y	sub.relcl	NA	NA	pos	NA	y	n	n	noef	ass	ass	dir	NA	NA	NA
. " The first thing Hearn reaches for when she's having a bad day is not a tailored piece but cashmere. " It feels good, which makes me feel good. It'll be beige if I feel okay but a bit fragile. If I'm really low on energy and need to go into overdrive for a presentation, it will be black. It's very classic-just a V-neck sweater, black cashmere trousers and kitten-heeled boots with pointy toes. …	465	30	NEED TO	COCA:2003:MAG	MAG	13	Bazaar	vb	n	pres	root	nec	ns	subjextn	circ	n	pres	sim	presvb	NA	n	act	dyn	GO INTO	n	1s	y	y	n	maincl	NA	decl	pos	NA	n	n	y	noef	ass	ass	dir	NA	NA	NA
. " The show's raison d'etre is solving Vivian's murder, although it strongly hints at the killer in the premiere. Perhaps it will live up to its title and this is a red herring. But anyone who's watched '' The Killing '' knows how frustrating too many red herrings can be. '' Revenge '' played this game much smarter, allowing the story to)%>play out without a lot of he-did-it, no-he-did-it moment…	466	53	CAN	COCA:2013:NEWS	NEWS	14	Pittsburgh	vb	NA	NA	root	pos	ws	gsp	circ	NA	pres	sim	presvb	NA	n	act	st	BE	n	3p	n	n	n	sub.nomcl	KNOW	NA	pos	NA	n	n	n	noef	ass	ass	dir	NA	NA	NA
. " Then gradually experiment with going faster and firmer, " instructs Kerner. Check to make sure he likes what you're doing.: Sextra credit: Stimulate two moan zones at the same time. //Asha Fuller THE C SPOT You probably know the ear is an erotic zone, but you might be surprised to discover just how powerful a turn-on the little body part is.)%>And the most scintillating section? The outer edg…	467	265	MIGHT	COCA:2008:MAG	MAG	13	Cosmopolitan	vb	NA	NA	ep	pos	ws	ep	disint	NA	pres	sim	presvb	NA	n	act	st	BE	n	2s	y	n	n	maincl	NA	decl	pos	NA	n	n	n	noef	exp	exp	indir	NA	NA	NA
. " There must be a central authority, the law, over all men of all races and a man who pays taxes for the support of that police control is certainly entitled to its protection. " They also worried that lynching provided the Soviet Union and other international adversaries with propaganda that might undermine American leadership in the world. '' The Klan is the best friend the)%>Communists have,…	468	270	MIGHT	COCA:2011:ACAD	ACAD	14	GeorgiaHisQ	vb	NA	NA	ep	pos	ws	ep	disint	NA	past	sim	presvb	NA	n	act	dyn	UNDERMINE	n	3s	n	n	n	sub.relcl	NA	NA	pos	NA	n	n	n	noef	ass	ass	dir	NA	NA	NA
. " They'd like to predict trouble, but 75 percent of the problems show up where they did n't predict it. " He said he once found a garage-size compressor under a platform that had broken braces as it hurtled through the water. # After inspectors find a problem, they must analyze it to decide if it is serious or not. Bea said this situation)%>becomes a problem because engineers use linear elastic…	469	335	MUST	COCA:2007:ACAD	ACAD	14	MechanicalEng	vb	NA	NA	root	nec	ns	subjextn	circ	n	pres	sim	presvb	NA	n	act	dyn	ANALYZE	n	3p	y	y	y	maincl	NA	decl	pos	NA	n	n	n	noef	ass	ass	dir	NA	NA	NA
. " They're water creatures, too. " # Celebrating the big 8-0, Bella Farrow was thrown 13, count' em, 13 birthday events last month. Some were heard to cluck over one invitation , which included a list of suggested presents. But with back-to-back soirees, practicality must figure in somewhere. Besides, re-gifting is so last century. '' I really)%>should be dead, " said Farrow, whose big heart has…	470	27	MUST	COCA:2004:NEWS	NEWS	14	SanFranChron	vb	NA	NA	root	nec	ws	gsn	circ	NA	pres	sim	presvb	NA	n	act	st	FIGURE	n	3s	n	n	n	maincl	NA	decl	pos	NA	n	n	n	noef	ass	ass	dir	NA	NA	NA
. " Wal-Mart and Target are taking away those that are price-sensitive, putting a squeeze on both ends of Kroger. " # Publix may be in a better competitive position, Whitehouse said. # " Publix has taken the high road, '' she said. '' The fact they've been able to get that close to Kroger means they did everything right. '' # Publixhas built a solid shopper base and earned a reputation for servic…	471	96	BE ABLE TO	COCA:2002:NEWS	NEWS	14	Atlanta	vb	NA	prespf	root	pos	ns	op	circ	y	pres	sim	presvb	NA	n	act	dyn	GET CLOSE TO	n	3p	y	y	n	sub.relcl	NA	NA	pos	NA	n	n	n	noef	ass	ass	dir	NA	NA	NA
. " We have to say,' Look, dude, this is n't what you think it is. You ca n't rock a T-shirt here unless you're a rock star.' # (How does one dress for a brunch that resembles a Russian oligarch's stag party? Ladies should consider brightly colored dresses or skirts and avoid cleavage-baring blouses. '' You don't)%>want that in your face at brunch,' said Mr. Koch, who now holds his brunch at diff…	472	67	SHOULD	COCA:2011:NEWS	NEWS	14	NYTimes	vb	NA	NA	root	nec	ns	subjextn	rul	n	pres	sim	presvb	NA	n	act	st	CONSIDER	n	3p	y	n	y	maincl	NA	decl	pos	NA	n	n	n	noef	ass	ass	dir	NA	NA	NA
. " While Prime Minister Shinzo Abe and local leaders push for construction of sea walls and the much-needed economic activity they will create, campaigners accuse the authorities of ignoring local people when coastal defense was first discussed in the wake of the disaster. '' People who experienced the tsunami learned that they could not defeat nature, '' says Akihiko Sugawara, chairman of the K…	473	348	COULD	COCA:2014:NEWS	NEWS	14	CSMonitor	neg.vb	NA	NA	root	pos	ns	ab	subjint	n	pastsub	sim	presvb	NA	n	act	dyn	DEFEAT	n	3p	y	y	n	sub.nomcl	LEARN	NA	not	negmod	n	n	n	noef	ass	ass	dir	NA	NA	NA
. " While they sat and waited for Vasya in the coffeeshop, Marina told Karpov several times that Vasya certainly would not come, because to be a midget in the circus not only entailed riding a pony around the arena, but also drinking oneself silly after the show, and if Karpov couldn't understand that, that was just evidence of his limited intelligence. Karpov listlessly)%>disagreed, but Marina s…	474	496	COULD	COCA:2014:FIC	FIC	13	NewEnglandRev	neg.vb	NA	NA	root	pos	ns	ab	subjint	n	past	sim	presvb	NA	n	act	st	UNDERSTAND	n	3s	y	n	n	sub.advcl	IF	NA	notc	negmod	n	n	y	noef	ass	ass	dir	NA	NA	NA
. # " The one in the Times. " # " Oh yeah, I read it last night. " # And? # " That kind of thing does n't bother me. " # Begala felt both stunned and relieved. '' He's the first donor I've ever met who could shake off a really tough editorial in the Sunday New York Times, '' he)%>later told me. # Katzenberg had been called a lot worse. # BEFORE HE WAS Jeffrey -- never Jeff -- he was Squirt. The s…	475	196	COULD	COCA:2013:MAG	MAG	13	MotherJones	vb	NA	NA	root	pos	ns	ab	subjint	n	past	sim	presvb	NA	n	act	dyn	SHAKE OFF	n	3s	y	y	n	sub.relcl	NA	NA	pos	NA	n	n	n	noef	ass	ass	dir	NA	NA	NA
. # " The really direct experiment probably will never be done, " Unruh said. " So you have to settle for the best we can do. It's not direct detection, but the technology now is amazing. '' # In order to carry out the test, Chen would need to enlist laser technology capable of producing tiny pulses of awesome power. One possibility would be to wait for the so-called Linac Coherent Light Source, …	476	419	NEED TO	COCA:2000:NEWS	NEWS	14	SanFranChron	vb	n	pastfut	root	nec	ns	subjextn	cond	NA	pres	sim	presvb	NA	n	act	dyn	ENLIST	n	3s	y	y	n	maincl	NA	decl	pos	NA	n	n	n	noef	ass	ass	dir	NA	NA	NA
. # " The treatments for my son were medically necessary, " Carlton says. Loud rock music is pulsing in the background. It must be his kids. Carlton ca n't be playing it. Nobody changes that much. '' We took my son to a practitioner of acupressure who was able to successfully treat him. '' # The Carlton I knew would not have knownwhat acupressure was. Also, he would have split his infinitives onl…	477	252	BE ABLE TO	COCA:2012:FIC	FIC	13	SatEvenPost	adv	NA	pret	root	pos	ns	ab	subjint	y	past	sim	presvb	NA	n	act	dyn	TREAT	n	3s	y	y	n	sub.relcl	NA	NA	pos	NA	n	n	n	noef	ass	ass	dir	NA	m	SUCCESSFULLY
. # " We want to reconcile Tunisians with their identity, their values, their culture, " said Lourimi, who was freed in 2007 from 17 years in prison. # " We do n't come from another planet. We're part of society. I don't know why anyone should worry, '' Lourimi said. '' Religion is part of our personality. '')%># AP reporters	478	489	SHOULD	COCA:2011:NEWS	NEWS	14	AssocPress	vb	NA	NA	root	nec	ns	subjextn	circ	n	pres	sim	presvb	NA	n	act	st	WORRY	n	3s	y	n	y	sub.nomcl	KNOW	NA	pos	NA	n	n	n	noef	ass	ass	dir	NA	NA	NA
. # 2 The beam of clicks bounces off the target and returns to the echolocating dolphin. Clicks can be overheard by neighboring dolphins.3 The lower jaw -- like the melon, filled with acoustic fat -- directs an incoming echo to the brain via the ear and auditory nerve. # Echolocating dolphins can identify targets as far away as half a mile. # Strand feeding # Some)%>dolphins will charge toward sh…	479	54	CAN	COCA:2015:MAG	MAG	13	NatGeog	vb	NA	NA	root	pos	ns	ab	subjint	n	pres	sim	presvb	NA	n	act	dyn	IDENTIFY	n	3p	y	y	y	maincl	NA	decl	pos	NA	n	n	n	noef	ass	ass	dir	NA	NA	NA
. # As many as 90% of people in the UK use a computer at work, and many people use a workstation that may not be a " desk " in the traditional sense. It is essential that employers know what practical advice to give employees who have multiple workstations. # Hot-desking can be problematic for disabled employees who may need to have their workstations specially set up)%>to accommodate their needs…	480	55	CAN	COCA:2015:ACAD	ACAD	14	OccupationalHealth	vb	NA	NA	root	pos	ws	gsp	circ	NA	pres	sim	presvb	NA	n	act	st	BE	n	3s	n	n	y	maincl	NA	decl	pos	NA	n	n	n	noef	ass	ass	dir	NA	NA	NA
. # But buying oil leases in the U.S. does not automatically give a company the right to drill. Shell still had to apply for over 30 permits from a range of regulatory agencies, including the Environmental Protection Agency, the Department of Interior and the National Oceanic and Atmospheric Administration. Shell might have weathered that process, but it made a strategic mistake: It failed to)%>c…	481	25	MIGHT	COCA:2015:MAG	MAG	13	Newsweek	vb	NA	NA	ep	pos	ws	ep	disint	NA	pres	ant	pfvbnc	past	n	act	dyn	WEATHER	n	3s	y	y	n	maincl	NA	decl	pos	NA	n	n	n	str	ass	ass	dir	NA	NA	NA
. # Conclusions # Our data clearly showed that O. lupi infection occurred in dogs from both sampling areas (overall positivity 8%), and that dogs exhibited different clinical features that ranged from no apparent clinical sign to blindness. The lack of any ocular lesions in O. lupi-infected dogs from site B might be due to differences in sampling times (i.e., during summer, site A)%>, and late au…	482	258	MIGHT	COCA:2013:ACAD	ACAD	14	EmergingInfectious	vb	NA	NA	ep	pos	ws	ep	disint	NA	pres	sim	presvb	NA	n	act	st	BE	n	3s	n	n	n	maincl	NA	decl	pos	NA	n	n	n	noef	ass	ass	dir	NA	NA	NA
. # FIRST STEPS O'Kelly started slowly. Instead of buying an orchard, she sought out small olive oil producers, packaging their goods under her St. Helena Olive Oil Co. label in two-ounce bottles, as well as larger options. A year in, she quit her day job. '' I needed to do this seriously or not at all, '' she explains. # BUDDING SUCCESS With $15,000 borrowed from her parents, O'Kelly moved the o…	483	318	NEED TO	COCA:2011:MAG	MAG	13	CountryLiving	vb	n	pret	root	nec	ns	subjextn	circ	n	past	sim	presvb	NA	n	act	dyn	DO	n	1s	y	y	n	maincl	NA	decl	pos	NA	n	n	n	noef	ass	ass	dir	NA	NA	NA
. # Fitzjames accused Joseph of making a false confession in the Tower. But why would his summoner falsely admit to (joint) murder rather than to administering a form of torture that went wrong? The answer , surely, is simple. Under canon law someone who tortures an accused party may be held guilty of a capital offence if the victim dies as a consequence.)%>The Church could also be expected to cl…	484	350	MAY	COCA:2014:MAG	MAG	13	HistoryToday	vb	NA	NA	root	pos	ws	sitperm	rul	NA	pres	sim	presvb	NA	n	pas	dyn	HOLD	n	3s	y	n	y	maincl	NA	decl	pos	NA	n	n	n	str	ass	ass	dir	NA	NA	NA
. # From the arid edge of the Alicante region comes this big, dense take on Mourvedre that shows off a volcanic-rock intensity, leathery huckleberry fruit and gutsiness that will more than take on a big roast. Importer: Eric Solomon/European Cellars # Finally - and this isn't to imply you should take on a bitter edge at the holidays - here are three picks from this)%>year's newly released product…	485	456	SHOULD	COCA:2010:NEWS	NEWS	14	SanFranChron	vb	NA	NA	root	nec	ns	subjextn	disint	n	pres	sim	presvb	NA	n	act	dyn	TAKE ON	n	2s	y	y	n	sub.nomcl	IMPLY	NA	pos	NA	n	n	n	noef	ass	ass	dir	NA	NA	NA
. # Gastrointestinal tract # There is a breakdown of mucus glands in both stomach and intestine and a decrease in pancreatic secretions. # As we age our calorific requirements decrease. By age 50, basal metabolic rates (BMR) are approximately 80%-85% of that in childhood.8 Weight increase in middle age may present you with an opportunity, through patient education, to promote a healthier lifestyl…	486	361	MAY	COCA:2012:ACAD	ACAD	14	PracticeNurse	vb	NA	NA	ep	pos	ws	ep	disint	NA	pres	sim	presvb	NA	n	act	st	PRESENT	n	3s	n	n	n	maincl	NA	decl	pos	NA	n	n	n	noef	ass	ass	dir	NA	NA	NA
. # Her Sugar Smart friends have transformed, too. " People keep asking me what I'm doing, " says Alison Ackerman, a nurse and mom of four who's dropped 35 pounds total. " Now I can honestly say, Nothing.' It's become a lifestyle I can happily live with. '' # Go to **29;1561;TOOLONG to join them in saying the)%>sweetest words ever spoken, overheard from Davies: " I stopped wanting it. " # Ready? …	487	56	CAN	COCA:2015:MAG	MAG	13	Prevention	adv	NA	NA	root	pos	ns	ab	subjint	n	pres	sim	presvb	NA	n	act	st	LIVE	n	1s	y	n	n	sub.relcl	NA	NA	pos	NA	n	n	n	noef	ass	ass	dir	NA	m	HAPPILY
. # In time, however, Japanese industry became wealthy enough that many corporations no longer needed to depend on the state. Japan's most internationally competitive firms, such as Toyota and Sony, have for some years financed most of their investments out of retained earnings. They certainly do not need to rely on state financing, and they do not even depend on Japanese capital markets. When th…	488	196	NEED TO	COCA:2001:ACAD	ACAD	14	ForeignAffairs	vb	y	pres	root	nec	ns	subjextn	circ	n	pres	sim	presvb	NA	n	act	st	RELY	n	3p	n	n	y	maincl	NA	decl	not	negmod	n	n	n	noef	ass	ass	dir	weak	im	CERTAINLY
. # In Volvo's real-world platooning tests, drafting resulted in average fuel savings of 10 to 15 percent--but that, too, is seen as the tip of the iceberg. Wayne Gerdes, the father of " hypermiling, '' can nearly double the rated efficiency of cars using fuel-sipping techniques that could be incorporated into auto-driving software. Efficiency could double again as human error is squeezed)%>out o…	489	418	COULD	COCA:2013:MAG	MAG	13	PopScience	vb	NA	NA	root	pos	ws	gsp	circ	NA	pres	sim	presvb	NA	n	pas	dyn	INCORPORATE	n	3p	n	n	n	sub.relcl	NA	NA	pos	NA	n	n	n	noef	ass	ass	dir	NA	NA	NA
. # It is widely believed that the persistence of negative signs on errors and omissions reflected unrecorded capital flight and that the switch to a positive sign in 2002 for the first time since 1989 might reflect a reversal of that black market capital outflow. At the same time, this particular statistic needs to be kept in perspective. The swing in 2002 amounted to no more than US$13 billion …	490	261	NEED TO	COCA:2004:ACAD	ACAD	14	AsianAffairs	vb	n	pres	root	nec	ws	gsn	circ	NA	pres	sim	presvb	NA	n	pas	st	KEEP	n	3s	n	n	n	maincl	NA	decl	pos	NA	n	n	n	noef	ass	ass	dir	NA	NA	NA
. # Perhaps, in response to student demand, universities are developing majors and academic disciplines which will draw significant numbers of students. However, such disciplines may not be in high demand in the marketplace, leading to graduates of such programs taking jobs outside their fields of expertise. Such jobs may not require a college degree, leading to a number of students feeling overq…	491	345	MAY	COCA:2014:ACAD	ACAD	14	CollegeStud	neg.vb	NA	NA	ep	pos	ws	ep	disint	NA	pres	sim	presvb	NA	n	act	st	REQUIRE	n	3p	n	n	y	maincl	NA	decl	not	negprop	n	n	n	noef	ass	ass	dir	NA	NA	NA
. # Professional Reading and resources in this issue are fewer than normal but perhaps more provocative. Loertscher provides a selection of books challenging some of the very basic tennets of traditional education, and challenging all of us to examine what 21st century learning and teaching might be, should be, or need to be. # Kirkland and Koechlin, guest authors in the '' What Works" column, pr…	492	481	NEED TO	COCA:2015:ACAD	ACAD	14	TeachLibrar	vb	n	pres	root	nec	ws	gsn	circ	NA	pres	sim	presvb	NA	n	act	st	BE	n	3s	n	n	n	sub.nomcl	EXAMINE	NA	pos	NA	n	n	n	noef	ass	ass	dir	NA	NA	NA
. # Rain and cancellations delayed the start of the 2004 season, but the Falcons managed to beat Duchesne 17-3 before losing to South Zone rival St. John's 12-0. # " For our first two games, we did all right, '' Kinkaid head coach Ellen Wallace said. '' We had to replace our pitcher, catcher, shortstop, first baseman and an outfielder. We had a lot of new kids out there for the first time. " # St…	493	382	HAVE TO	COCA:2004:NEWS	NEWS	14	Houston	vb	n	pret	root	nec	ns	subjextn	circ	y	past	sim	presvb	NA	n	act	dyn	REPLACE	n	1p	y	y	n	maincl	NA	decl	pos	NA	n	n	n	noef	ass	ass	dir	NA	NA	NA
. # Table 2 provides our " top 10 " principles for general and special educators when leading mathematics and science stations. These ideas are easy to integrate, incorporate strategies that specifically meet the needs of students with disabilities, and will increase your success in using stations in your co-teaching. # Technology can provide an additional support structure when creating a third …	494	57	CAN	COCA:2013:ACAD	ACAD	14	TeachingExceptional	vb	NA	NA	root	pos	ws	gsp	circ	NA	pres	sim	presvb	NA	n	act	dyn	PROVIDE	n	3s	n	n	y	maincl	NA	decl	pos	NA	n	n	n	noef	ass	ass	dir	NA	NA	NA
. # Taylor also knows lions. She knows that lions do n't kill livestock for fun. A lioness attacks livestock to feed her pride. # For many years, Taylor has watched the herders and the lions cause problems for each other. She cares deeply for both. She knew she needed to do something to help. Taylor started to think of ways to fix the problem. # Flawed Fencing # The only way to keep both lions an…	495	362	NEED TO	COCA:2012:MAG	MAG	13	NationalGeographic	vb	n	pret	root	nec	ns	subjextn	circ	n	pastsub	sim	presvb	NA	n	act	dyn	DO	n	3s	y	y	n	sub.nomcl	KNOW	NA	pos	NA	n	n	n	noef	ass	ass	dir	NA	NA	NA
. # The first notices were printed in local newspapers. An online registry followed in 1999. Since then, the number of registered offenders has more than tripled to 54,000, including nearly 7,500 who committed their crimes as juveniles, according to the Texas Department of Public Safety. Most offenders now must register for life. # A difference in danger # But not all sex offenders)%>pose the sam…	496	38	MUST	COCA:2008:NEWS	NEWS	14	Houston	vb	NA	NA	root	nec	ns	perm	rul	n	pres	sim	presvb	NA	n	act	dyn	REGISTER	n	3p	y	y	n	maincl	NA	decl	pos	NA	n	n	n	noef	ass	ass	dir	NA	im	NOW
. # The process may be enlightening. One young woman took all her credit cards, put them in a bowl of water and froze them. # Applegarth recommends the cautious approach. " " I'm not the kind of person who says,' Cut them up.' But you need to make it harder to use them, '' she says. '' '' I recommend using only one credit card, one you have to pay off every month or vow that you will. I normally …	497	435	NEED TO	COCA:1995:NEWS	NEWS	14	Houston	vb	n	pres	root	nec	ns	subjextn	cond	n	pres	sim	presvb	NA	n	act	dyn	MAKE	n	2s	y	y	y	maincl	NA	decl	pos	NA	n	n	n	noef	ass	ass	dir	NA	NA	NA
. # The taxi pulled out of the airport exit and onto the northbound lane of the George Washington Parkway, went about half a mile, and then turned onto a causeway leading to a slice of land jutting along the shore of the Potomac River. Across the dark strip of water Perenchio could see the Washington Monument rising into the night sky. # '' Okay, mister)%>. Here's Roaches Run, " the driver said. …	498	270	COULD	COCA:2015:FIC	FIC	13	Bk:Collision	vb	NA	NA	root	pos	ws	gsp	circ	NA	past	sim	presvb	NA	n	act	st	SEE	n	3s	y	n	n	maincl	NA	decl	pos	NA	n	n	n	noef	ass	ass	dir	NA	NA	NA
. # This policy covers the functionality of advertised products that purport to offer savings in energy, mileage, or other measures of efficiency; however, due to many variables that may affect product usage by a consumer , this warranty does not extend to claims regarding the specific amount of efficiencies that may result from use of a product. # This policy covers the functionality of educatio…	499	399	MAY	COCA:2011:MAG	MAG	13	GoodHousekeeping	vb	NA	NA	ep	pos	ws	ep	disint	NA	pres	sim	presvb	NA	n	act	dyn	RESULT	n	3p	n	n	n	sub.relcl	NA	NA	pos	NA	n	n	n	noef	ass	ass	dir	NA	NA	NA
. # What might these students have produced had they been allowed and encouraged to continue with their striking words? What might the teacher have done to nurture this? What the students are thinking and trying to communicate is what is really important, not the parameters of the assignment. The teacher needed to ask questions about what the students know, think, or feel about a tornado. To the …	500	359	NEED TO	COCA:1999:ACAD	ACAD	14	MusicEduc	vb	n	pret	root	nec	ns	subjextn	circ	n	past	sim	presvb	NA	n	act	dyn	ASK	n	3s	y	y	n	maincl	NA	decl	pos	NA	n	n	n	noef	ass	ass	dir	NA	NA	NA
. # When early polls came in showing McConnell on the verge of becoming the first Republican to win statewide in Kentucky in 16 years, " the word was that the champagne corks were being popped all over Washington , '' he recalled. '' They figured if Mitch McConnell was winning, we must be in the middle of a landslide. '' # In fact, Republicans lost)%>a seat that year, and McConnell turned out to …	501	202	MUST	COCA:2011:NEWS	NEWS	14	WashPost	vb	NA	NA	ep	nec	ws	ep	disint	NA	pres	sim	presvb	NA	n	act	st	BE	n	1p	y	n	n	sub.nomcl	FIGURE	NA	pos	NA	n	n	n	noef	ass	ass	dir	NA	NA	NA
. (APPLAUSE) It's time for a leader to bring Republicans and Democrats together to make sure the Medicare system fulfills its promise to our seniors, that the Medicare system makes sure there's prescription drugs available for all seniors. And if seniors are unhappy with the Medicare plan, they ought to be given additional options, additional choices from which to choose the plan that best suits …	502	179	OUGHT TO	COCA:2000:SPOK	SPOK	14	CNN_Event	vb	n	NA	root	nec	ws	gsn	disint	NA	pres	sim	presvb	NA	n	pas	dyn	GIVE	n	3p	y	n	y	maincl	NA	decl	pos	NA	n	n	n	noef	ass	ass	dir	NA	NA	NA
. (AUDIENCE-BOOING) HANNITY# All right, A-Rod getting booed again tonight. We're going to continue to monitor the Yankees game in Chicago. We'll bring you updates, highlights as they happen. Plus, it seems like, well, there are slim pickings when it comes to who our kids should look up to these days. We'll going to talk about that next.)%>Also, you can select tonight's video of the day. And you g…	503	167	SHOULD	COCA:2013:SPOK	SPOK	14	Fox	vb	NA	NA	root	nec	ns	subjextn	circ	n	pres	sim	presvb	NA	n	act	dyn	LOOK UP	n	3p	y	y	y	sub.nomcl	WHEN IT COMES TO	NA	pos	NA	n	n	n	noef	exp	exp	dir	NA	NA	NA
. (CROSSTALK) AMY-WALTER# She also has to come up with a rationale for her candidacy. And that's a lot of the frustration from a lot of Democrats, which is, you can put the infrastructure in place , but where is the rationale for your candidacy? And, also, you can change the paint on the car, but are you changing the engine? In)%>other words, is Hillary Clinton still going to be the same candidat…	504	58	CAN	COCA:2015:SPOK	SPOK	14	PBS	vb	NA	NA	root	pos	ws	gsp	circ	NA	pres	sim	presvb	NA	n	act	dyn	CHANGE	n	2s	y	y	y	maincl	NA	decl	pos	NA	n	n	n	noef	ass	ass	dir	NA	initial	ALSO
. (Crosstalk) GUILFOYLE# No. It gives you the worst stomachache, right? BOLLING# Can I jump in very quick? I know they are wrapping us. But how we -- how are -- how are we going to handle her? How am I specifically going to handle going from -- I must be a racist if I disagree with Obama. And now, I must not)%>be a feminist if I disagree with her (ph). GUTFELD# Exactly. (Crosstalk) PERINO# You're…	505	383	MUST	COCA:2015:SPOK	SPOK	14	Fox	vb	NA	NA	ep	nec	ws	ep	disint	NA	pres	sim	presvb	NA	n	act	st	BE	n	1s	y	n	n	maincl	NA	decl	pos	NA	n	n	n	noef	ass	ass	dir	NA	NA	NA
. 2:55 p.m. Brauchler handed Reid a book that psychiatrists use to help diagnose people. Reid read a paragraph from the book that cautions clinicians that the definitions of mental disorders in the book do not match the definitions used in the legal system. A second paragraph also cautioned that diagnostic information could be misused or misunderstood. Reid also read a paragraph warning that diag…	506	209	COULD	COCA:2015:NEWS	NEWS	14	Denver	vb	NA	NA	ep	pos	ws	ep	disint	NA	pastsub	sim	presvb	NA	n	pas	dyn	MISUSE	n	3p	n	n	n	sub.nomcl	CAUTION	NA	pos	NA	n	n	n	noef	ass	ass	dir	NA	NA	NA
. 4) Implement an early-assessment and monitoring system to identify students at risk of dropping out. Such strategies can complement related efforts by colleges to improve the academic preparation of their incoming freshmen. # I believe that the Crystallized Learning and Academic Study System as a cognitive- behavioral approach to studying and learning can be used as an integral part of a colleg…	507	59	CAN	COCA:2014:ACAD	ACAD	14	InstrPsych	vb	NA	NA	root	pos	ws	gsp	circ	NA	pres	sim	presvb	NA	n	pas	dyn	USE	n	3s	n	n	n	sub.nomcl	BELIEVE	NA	pos	NA	n	n	n	noef	ass	ass	dir	NA	NA	NA
. A Blood by the name of Little Ghost had been giving me the slip for weeks. Anytime I was able to feed my handcuffs with a predator gave me a warm feeling. He'd set up shop slinging rock cocaine two blocks from a middle school, and I hadn't been able to nab him. I put on a gray raincoat over my uniform and snuckup on him through a back alley, caught him right in the middle of a hand-to-hand deal…	508	415	BE ABLE TO	COCA:2016:FIC	FIC	13	Bk:Replacements	vb	NA	pastpf	root	pos	ns	op	circ	n	past	sim	presvb	NA	n	act	dyn	NAB	n	1s	y	y	n	maincl	NA	decl	notc	negmod	n	n	n	noef	ass	ass	dir	NA	NA	NA
. A dermatologist told me to " wear a wig and save your money. " Now I'm 83 and have no body hair. I worried this might happen to my daughters, but they have thick, nice hair. Even though there is no pain involved with hair loss, people should know that it is very hard to live with. # I wouldn't wish)%>it on anyone- especially a child. # Dorothy Bergh # Merrill, Wisconsin # Gaga Over Gulley # Rea…	509	70	SHOULD	COCA:2011:MAG	MAG	13	SatEvenPost	vb	NA	NA	root	nec	ns	subjextn	disint	n	pres	sim	presvb	NA	n	act	st	KNOW	n	3p	y	n	y	maincl	NA	decl	pos	NA	n	n	n	noef	ass	ass	dir	NA	NA	NA
. A detour would mean starting from scratch, years more planning and a new batch of landowners to deal with. I guess Natalie kept at it long enough that her boss had to lay things out pretty plain , and say that if she insisted on confusing fact with fantasy, he'd have to let her go and find someone else to finish her report. Lots of others out there, he'd told her, and most did n't need his help…	510	104	HAVE TO	COCA:2010:FIC	FIC	13	The Antioch Review	vb	n	pastfut	root	nec	ns	subjextn	circ	n	fut	sim	presvb	NA	n	act	st	LET	n	3s	y	n	n	sub.nomcl	SAY	NA	pos	NA	n	n	n	noef	ass	ass	dir	NA	NA	NA
. A majority of students interacted with multiple source types (see Figure 2), and 26% of the students studied interacted with them all! The evidence produced by this study reveals a gap. First semester, first year college students must interact with information using 21st century skills and dispositions they may not have been taught in high school. Considering the inadequate student-to-librarian…	511	48	MAY	COCA:2010:ACAD	ACAD	14	TeachLibrar	neg.vb	NA	NA	ep	pos	ws	ep	disint	NA	pres	ant	pfvbnc	ant	n	pas	dyn	TEACH	n	3p	n	n	y	sub.relcl	NA	NA	not	negprop	n	n	n	noef	ass	ass	dir	NA	NA	NA
. A smile crossed his deeply tanned face as he hauled in the last trap. It had been an exceptionally good day. He had found the honey hole by accident a couple of months earlier. The spot produced an endless supply of lobsters, and he kept coming back even though he had to go farther from land than normal. Fortunately, his thirty-six-foot wooden boat was seaworthy even with a full load. Setting a…	512	358	HAVE TO	COCA:2003:FIC	FIC	13	Bk:FireIce	vb	n	pret	root	nec	ns	subjextn	circ	y	past	sim	presvb	NA	n	act	dyn	GO	n	3s	y	y	n	sub.advcl	EVEN THOUGH	NA	pos	NA	n	n	n	noef	ass	ass	dir	NA	NA	NA
. Aboriginal artwork was shown as some major events. And the biggest testaments to reconciliation came during the Opening Ceremony in which aboriginal musicians and dancers were featured. And Cathy Freeman, an aboriginal athlete, lit the Olympic caldron. Mr-ELLA: She symbolizes the hopes and the struggles that aboriginal people have had to endure means she's a proud Australian as well. So to see …	513	419	HAVE TO	COCA:2000:SPOK	SPOK	14	NPR_Morning	vb	n	prespf	root	nec	ns	subjextn	circ	n	pres	sim	presvb	NA	n	act	st	ENDURE	n	3p	y	n	y	sub.relcl	NA	NA	pos	NA	n	n	n	noef	ass	ass	dir	NA	NA	NA
. Across Southern California, residents started to think recovery instead of survival. The dearest indication of that Jokes started Some residents put signs up outside their houses-or more accurately, where their houses used to be. One read '' Finally, no termites. '' Another: '' Fire sale, everything must go!! '' As game time approached Sunday, the smell that had blanketed)%>the city for most of…	514	3	MUST	COCA:2007:MAG	MAG	13	SportingNews	vb	NA	NA	root	nec	ws	gsn	circ	NA	pres	sim	presvb	NA	n	act	dyn	GO	n	3s	n	n	n	maincl	NA	decl	pos	NA	n	n	n	noef	ass	ass	dir	NA	NA	NA
. African American students that were successful at PWIs also conveyed a sense of confidence, were amicable and cordial and could adapt to a racially homogenous mix. # According to Reynolds &; Pope (1994) that in order for PWIs to embrace minority students and promote multicultural initiatives, long range strategies must be inclusive of correctly changing: a) mission statements, b) institutional …	515	91	MUST	COCA:2003:ACAD	ACAD	14	InstrPsych	vb	NA	NA	root	nec	ws	gsn	cond	NA	pres	sim	presvb	NA	n	act	st	BE	n	3p	n	n	n	maincl	NA	decl	pos	NA	n	n	n	noef	ass	ass	dir	NA	NA	NA
. After SkyMall had declared bankruptcy back in January it was bought by a New Jersey marketing company. And this week the company tweeted SkyMall is back. The catalog with all of its quirky products like that robot cat litter box could be back on planes later this year. So Al you can load up on all those things you really don't need but still like to)%>buy. AL ROKER: Oh, I was hoping. I was hopi…	516	60	CAN	COCA:2015:SPOK	SPOK	14	NBC	vb	NA	NA	root	pos	ns	op	circ	n	pres	sim	presvb	NA	n	act	dyn	LOAD UP ON	n	2s	y	y	n	maincl	NA	decl	pos	NA	n	n	n	noef	ass	ass	dir	NA	NA	NA
. Alarms went off in her head when she noticed the wealth of pretend-play toys, such as dress-up clothes and a little kitchen, strewn about the classroom. Imaginative play is a skill that was robbed from Ryan by his regression and needs to be taught to him. Though his typical classmates might set up a restaurant near the child-size kitchen and start taking food orders, Ryan)%>is n't able to dream…	517	12	MIGHT	COCA:2008:MAG	MAG	13	Redbook	vb	NA	NA	ep	pos	ws	ep	disint	NA	pres	sim	presvb	NA	n	act	dyn	SET UP	n	3p	y	y	n	sub.advcl	THOUGH	NA	pos	NA	n	n	n	str	ass	ass	dir	NA	NA	NA
. All that discipline led Bill to a tour of duty in Iraq, where he interned for the non-denominational minister and, like the prophets of scripture, heard his calling to the Presbyterian clergy in the desert wind . Meanwhile, I was busy turning down a career in technical writing so I could move with my girlfriend to Iowa and work in a copy store. When the)%>differences in our lives overwhelmed th…	518	322	COULD	COCA:2014:FIC	FIC	13	Confrontation	vb	NA	NA	root	pos	ns	op	circ	n	past	sim	presvb	NA	n	act	dyn	MOVE	n	1s	y	y	n	sub.advcl	SO THAT	NA	pos	NA	n	n	n	noef	ass	ass	dir	NA	NA	NA
. All that's in his head when he's there, he says, is " the picture. I believe very strongly in the autonomy of the picture. " # It is one of the ironies of his art that his paintings seem so effortless and quick. In fact, it can take him up to a year before he makes the first mark and three or)%>more years to complete a picture. And there's more to his painting than the application of paint: " I…	519	61	CAN	COCA:2014:MAG	MAG	13	NewStatesman	vb	NA	NA	root	pos	ws	gsp	circ	NA	pres	sim	presvb	NA	n	act	st	TAKE	n	3s	n	n	n	maincl	NA	decl	pos	NA	n	n	n	noef	ass	ass	dir	NA	NA	NA
. An instant connection formed in her mind, without any process of thought. All her life, since she was a small chd, she had liked to be up very early on days like this hecause later on, as soon as there was any strength in the sunlight, she would need to be indoors, or cowering under a parasol or smearing herself every twenty minutes with simblock. It was part of her inheritance, her troll blood…	520	117	NEED TO	COCA:2015:FIC	FIC	13	FantasySciFi	vb	n	pastfut	root	nec	ns	subjextn	circ	NA	past	sim	presvb	NA	n	act	st	BE	n	3s	y	n	n	maincl	NA	decl	pos	NA	n	n	n	noef	ass	ass	dir	NA	NA	NA
. And- and it was never- in the argot of Wall Street, when you say junk bond, you mean bonds that were issued to help one raider gain corporate control or to help an established management ward off those raiders. That is 90 percent of the market and I think really we ought to restrict our conversation to that KINSLEY Okay. We have to take a break . When we come back, we're going to talk about to …	521	66	OUGHT TO	COCA:1990:SPOK	SPOK	14	CNN_Crossfire	vb	n	NA	root	nec	ns	subjextn	disint	n	pres	sim	presvb	NA	n	act	dyn	RESTRICT	n	1p	y	y	n	sub.nomcl	THINK	NA	pos	NA	n	n	n	noef	ass	ass	dir	str	initial	REALLY
. And Cokie, I interrupted you just as you were about to tell us what some of the political motives may have been behind the President denying things that he really did n't have to deny tonight. COKIE ROBERTS: Because if he wanted to put this whole matter behind him, he had to say that there was no obstruction of justice. That is the one thing that has been the caveat that every member of Congres…	522	347	HAVE TO	COCA:1998:SPOK	SPOK	14	ABC_Nightline	vb	n	pret	root	nec	ns	subjextn	cond	n	past	sim	presvb	NA	n	act	dyn	SAY	n	3s	y	y	n	maincl	NA	decl	pos	NA	n	n	n	noef	ass	ass	dir	NA	NA	NA
. And ever wondered what goes on behind palace walls? Well, feed your imagination with some very unofficial and fictional family photos of the new Prince George. All in good fun, of course. ANDERSON# This is Connect the World. The top stories this hour. Germany says the U.S. must now reestablish trust among European allies after the latest allegations of spying. Chancellor Angela)%>Merkel says th…	523	481	MUST	COCA:2013:SPOK	SPOK	14	CNN	adv	NA	NA	root	nec	ns	subjextn	circ	n	pres	sim	presvb	NA	n	act	dyn	REESTABLISH	n	3s	y	y	n	sub.nomcl	SAY	NA	pos	NA	n	n	n	noef	ass	ass	dir	NA	m	NOW
. And for early detection, ask your hairdresser if she notices moles, bumps or color blotches that were n't there before or that have changed. # 2 THE EYES # It's tough to apply sunscreen to eyelids or skin around your eyes, leaving that skin at risk. Skin cancer can also occur behind the iris, says Charlotte Akor, M.D., an ophthalmologist in)%>Abilene, Texas. # SAVE YOUR SKIN: Wear sunglasses wi…	524	62	CAN	COCA:2015:MAG	MAG	13	Essence	adv	NA	NA	root	pos	ws	gsp	circ	NA	pres	sim	presvb	NA	n	act	dyn	OCCUR	n	3s	n	n	y	maincl	NA	decl	pos	NA	n	n	n	noef	ass	ass	dir	NA	m	ALSO
. And I think our committee ought to take a look at what documents there were, what paper that may have been generated at the staff level, which would have justified a change by the president. And I think we ought to be questioning the chief executive officer of the companies who ought to make an effort to question the people from the government of China, of the Chinese companies which were invol…	525	225	OUGHT TO	COCA:1998:SPOK	SPOK	14	PBS_Newshour	vb	n	NA	root	nec	ns	subjextn	disint	n	pres	sim	presvb	NA	n	act	dyn	MAKE	n	3s	y	y	n	sub.relcl	NA	NA	pos	NA	n	n	n	noef	ass	ass	dir	NA	NA	NA
. And just as the first guest arrives, I notice that I dusted only half of a very visible lampshade, and that my son's dirty sweat sock is wedged under a hassock. " Why do I do this to myself? '' I mutter. '' Schedule something that means I have to clean and shop midweek, when work is so busy? '' The answer is obvious: I do this because even if I do n't like stress, I like the things in my life t…	526	217	HAVE TO	COCA:2010:MAG	MAG	13	GoodHousekeeping	vb	n	pres	root	nec	ns	subjextn	disint	n	pres	sim	presvb	NA	n	act	dyn	CLEAN	n	1s	y	y	n	sub.nomcl	MEAN	NA	pos	NA	y	n	n	noef	exp	exp	indir	NA	e	MIDWEEK
. And just think of all those lawsuits. " " Yeah, " Trista said. Something else was nagging at the back of her mind. " So why did n't they just take it into space? '' Who had told her about such things? The stooped old man? It must have been someone she knew when she was young, because it would never have)%>caught her attention later on. Perhaps last night's satellite had brought it back to mind.…	527	21	MUST	COCA:2006:FIC	FIC	13	Analog	vb	NA	NA	ep	nec	ws	ep	disint	NA	pres	ant	pfvbnc	ant	n	act	st	BE	n	3s	n	n	n	maincl	NA	decl	pos	NA	n	n	n	noef	ass	ass	dir	NA	NA	NA
. And most of the people present had direct ties to the school. Buchek said a sense of complacency has plagued the public schools because the district did n't lose accreditation overnight. It was provisionally accredited for 16 years. But he and other mayors have apologized in recent years and said more should have been done collectively. Others aren't nearly so apologetic. '' This is)%>a high-en…	528	210	SHOULD	COCA:2014:NEWS	NEWS	14	STLouis	vb	NA	NA	root	nec	ws	gsn	cond	NA	past	sim	pfvbnc	count	n	pas	dyn	DO	n	3s	n	n	n	sub.nomcl	SAY	NA	pos	NA	n	y	n	noef	ass	ass	dir	NA	e	COLLECTIVELY
. And our number 1-800-989-8255. Let's get into some of the nitty-gritty of the technologies we're talking about, because I'm sure my listeners are very interested in this. Let's talk about Ausra's Fresnel lenses first. Tell us what a Fresnel lens is and how are you able to concentrate the solar power so well so that you can make it so efficiently. Mr-MILLS: Well, in the first place, it's not a l…	529	418	BE ABLE TO	COCA:2008:SPOK	SPOK	14	NPR_TalkNation	vb	NA	pres	root	pos	ns	ab	subjint	n	pres	sim	presvb	NA	n	act	dyn	CONCENTRATE	n	2p	y	y	n	sub.nomcl	TELL	NA	pos	NA	n	n	n	noef	dir	dir.ord	dir	NA	NA	HOW WELL
. And Rabbi Mandelbaum has brought the small, beautiful scroll, and in half an hour forty minutes, they've raced through a morning service and changed David to Chaim David, and he kisses the Torah just before Meyer and another doctor come in to relax him for surgery. # - May you live to 120 as Chaim David, Mandelbaum says, blessing and departing.)%>He stops in the doorway and raises a forefinger …	530	177	MAY	COCA:2011:ACAD	ACAD	14	Commentary	subjinv	NA	NA	root	pos	ws	gsp	circ	NA	pres	sim	presvb	NA	n	act	st	LIVE	n	2s	y	n	n	maincl	NA	decl	pos	NA	n	n	n	str	exp	exp	dir	NA	NA	NA
. And then there's the money piece, that post-2014, between the civilian and military aid, it's like $8 billion a year. Afghanistan's total government revenue is about $1.5 billion. How much longer can we pay and is there an expectation that they will at some point be able to pay for themselves? That's not really clear. BURNETT# Here in theneighborhood of Afghanistan, in Kabul, that we're in, wea…	531	329	BE ABLE TO	COCA:2012:SPOK	SPOK	14	CNN: Erin Burnett Outfront	vb	NA	fut	root	pos	ns	op	circ	n	fut	sim	presvb	NA	n	act	dyn	PAY	n	3p	y	y	n	sub.relcl	NA	NA	pos	NA	n	n	n	noef	ass	ass	dir	NA	m	AT SOME POINT
. And then they will go through this tedious and somewhat boring process of writing the report and it will be brought up to the NTSB board members who are political appointees and eventually they will have to sign off on whatever the probable cause is if -- if, in fact, they're able to identify a probable cause. But like Chairman Hall said last night, thatis a process that will probably stretch w…	532	435	BE ABLE TO	COCA:1999:SPOK	SPOK	14	CBS_Special	vb	NA	pres	root	pos	ns	op	circ	n	pres	sim	presvb	NA	n	act	dyn	IDENTIFY	n	3p	y	y	n	sub.advcl	IF	NA	pos	NA	n	n	y	noef	ass	ass	dir	NA	initial	IN FACT
. And to make matters worse, it was a hot July day in Fort Lauderdale, Ma. Go for the Gold He lost the game and the second set, then spent 10 minutes before the third set in the bathroom, throwing up. There was some question whether he would be able to keep playing. But he did. And even when lie fell behind 5-1in the final set, he did n't want to stop. He stood at the umpire's chair, trembling, a…	533	287	BE ABLE TO	COCA:2004:MAG	MAG	13	BoysLife	vb	NA	pastfut	root	pos	ns	ab	subjint	n	past	sim	presvb	NA	n	act	st	KEEP	n	3s	y	n	n	sub.nomcl	THERE IS SOME QUESTION THAT	NA	pos	NA	n	n	n	noef	ass	ass	dir	NA	NA	NA
. And yet -- so I worry about premature consolation, but, also, of course, silence is not the answer either, because silence and isolation and guilt are what become so unbearable for the child and even for -- and for the parents as well, of course. So there has to be some possibility of speech and of listening. And also what I -- what I know from my own experience is, if someone can hold the chil…	534	286	HAVE TO	COCA:2014:SPOK	SPOK	14	PBS	vb	n	pres	root	nec	ws	gsn	circ	NA	pres	sim	presvb	NA	n	act	st	BE	n	3s	n	n	n	maincl	NA	decl	pos	NA	n	n	n	noef	ass	ass	dir	NA	NA	NA
. And you fill it in, you know, you fill it in yourself. MATT-LAUER# So what's the magic tablet have in store for us this time? BEN-STILLER# Well, it's corroding, it starting to malfunction and the creatures are starting to sputter out, and they might-- they might be actually, you know, their lives might be ending. So we have)%>to figure out what's wrong with it and we have to go to the British m…	535	277	MIGHT	COCA:2014:SPOK	SPOK	14	NBC	vb	NA	NA	ep	pos	ws	ep	disint	NA	pres	sim	presvb	NA	n	act	st	BE	n	3p	y	n	n	maincl	NA	decl	pos	NA	n	n	n	noef	ass	ass	dir	NA	ie	ACTUALLY
. And, Jeff Toobin, do you think that, you know, should the public know the ins and the outs of what happened to fight this war on terror? TOOBIN# what's been done in the name of the American people should almost always be public. Obviously, if you can point to specific facts that in specific negative implications, then you have to take)%>a second look. But by and large, the rule should be full d…	536	63	CAN	COCA:2014:SPOK	SPOK	14	CNN	vb	NA	NA	root	pos	ws	gsp	circ	NA	pres	sim	presvb	NA	n	act	dyn	POINT	n	2s	y	y	y	sub.advcl	IF	NA	pos	NA	n	n	y	noef	ass	ass	dir	NA	NA	NA
. And, of course, glass jars are some of the best vessels for delivering drinks from spout to mouth, and for storing your leftovers. # Recycle: Don' t toss 4148548 glass, such as light bulbs, window glass, 4131504 or crystal, into the bin, as it can cause problems for processors of used glass containers. Instead, if it' s)%>still intact, seek out local recycling alternatives, use it in a DIY proj…	537	64	CAN	COCA:2015:MAG	MAG	13	MotherEarth	vb	NA	NA	root	pos	ws	gsp	circ	NA	pres	sim	presvb	NA	n	act	dyn	CAUSE	n	3s	n	n	n	maincl	NA	decl	pos	NA	n	n	n	noef	ass	ass	dir	NA	NA	NA
. As president, however, Obama has called for extending the tax at its current, dramatically reduced rate. That amounts to accepting Bush's massive tax cut for the rich, one which leaves $30 billion more per year in the hands of the wealthy than Bill Clinton did. Wealthy estates might seem a particularly tempting target, given that Obama faces a $90 billion shortfall in)%>funding for his ambitiou…	538	220	MIGHT	COCA:2009:MAG	MAG	13	RollingStone	vb	NA	NA	ep	pos	ws	ep	disint	NA	pres	sim	presvb	NA	n	act	st	SEEM	n	3p	n	n	n	maincl	NA	decl	pos	NA	n	n	n	str	ass	ass	dir	NA	NA	NA
. Baccalaureate programs offered by community colleges that are located in regions where there is no university, or no university that offers a program in the student's field of study, may meet the needs of students who , because of family, work, and financial constraints, would otherwise not be able to complete the baccalaureate. Though the needs of some place-bound students might be metby unive…	539	353	BE ABLE TO	COCA:2011:ACAD	ACAD	14	CommCollegeR	vb	NA	pastfut	root	pos	ns	op	circ	n	pres	sim	presvb	NA	n	act	dyn	COMPLETE	n	3p	y	y	y	sub.relcl	NA	NA	not	negmod	n	n	n	noef	ass	ass	dir	NA	m	OTHERWISE
. Because of his own experience, customer service was a top priority for Daniel. He started finding suppliers who offered superior products at better prices. He also started thinking he could do a better job if he was on his own. If he had his own company, he would be able to really help customers and build his own reputation rather than someone else's.So after only a month at his new job, Daniel…	540	23	BE ABLE TO	COCA:2004:MAG	MAG	13	BoysLife	adv	NA	pastfut	root	pos	ns	op	circ	n	pres	sim	presvb	NA	n	act	dyn	HELP	n	3s	y	y	n	maincl	NA	decl	pos	NA	n	y	n	noef	ass	ass	dir	NA	m	REALLY
. Bush, held up by his supporters as the man who could restore sanity to his party, could be a tougher sell to the modern GOP. His record on social issues has not stirred conservatives. His passion for education policy is not one the Tea Party shares. And he would have to overcome the hostility to the Bush name engendered by his brother' s two terms in the White House. It is not difficult to imag…	541	211	HAVE TO	COCA:2013:MAG	MAG	13	NewRepublic	vb	n	pastfut	root	nec	ns	subjextn	circ	n	pres	sim	presvb	NA	n	act	dyn	OVERCOME	n	3s	y	y	n	maincl	NA	decl	pos	NA	n	n	n	noef	ass	ass	dir	NA	NA	NA
. But Democrat Diana DeGette of Colorado said that needs to change. REP-DIANA-DEGETTE-: It absolutely shocks people, when I explain to them that, during an outbreak in food-borne illness, like the ones well hear about today, the federal governments hands are tied when it comes to recalls. We must rely on the industry to voluntarily recall their products. JEFFREY-BROWN: Another piece of)%>legislat…	542	358	MUST	COCA:2007:SPOK	SPOK	14	PBS_Newshour	vb	NA	NA	root	nec	ns	subjextn	circ	n	pres	sim	presvb	NA	n	act	st	RELY	n	1p	y	n	y	maincl	NA	decl	pos	NA	n	n	n	noef	ass	ass	dir	NA	NA	NA
. But for the love of God, tell me what exactly you stand for and stick by it. GEORGE-STEPHANOPOU# (Off-camera) What's your sense of where his thinking is right now? He said he's gon na make the decision by sometime next year but wants to do it only if he can - run joyfully? Is that what he said? ANA-NAVARRO# look, he's)%>being very transparent on where he is, what he's saying publicly is very co…	543	65	CAN	COCA:2014:SPOK	SPOK	14	ABC	vb	NA	NA	root	pos	ns	ab	subjint	n	pres	sim	presvb	NA	n	act	dyn	RUN	n	3s	y	y	n	sub.advcl	IF	NA	pos	NA	n	n	y	noef	ass	ass	dir	NA	e	JOYFULLY
. But mountain rescue is only in the mountains. It's a low-profile kind of thing. We do n't really talk to the press, and we do n't advertise when we go out. We do n't do press releases telling everybody what we do. Maybe we should. My book might help bring out some of the work we do. '' # As evidenced by)%>high-profile media coverage of operations ranging from the recent rescue of a Kansas man w…	544	423	MIGHT	COCA:2007:NEWS	NEWS	14	Denver	vb	NA	NA	ep	pos	ws	ep	disint	NA	pres	sim	presvb	NA	n	act	dyn	HELP	n	3s	n	n	n	maincl	NA	decl	pos	NA	n	n	n	noef	ass	ass	dir	NA	NA	NA
. But there is another place I believe the administration has- TED KOPPEL: Well, let me- let me stop you on that note- LAWRENCE EAGLEBERGER: Yeah, go ahead. TED KOPPEL: -because I think it 's a large enough issue- LAWRENCE EAGLEBERGER: Yeah. TED KOPPEL: -that we ought to have more time to discuss it. So we will take a short break and we will be back with Secretary Larry Eagleberger and Dr. Zbigni…	545	141	OUGHT TO	COCA:1995:SPOK	SPOK	14	ABC_Nightline	vb	n	NA	root	nec	ns	subjextn	disint	n	pres	sim	presvb	NA	n	act	st	HAVE	n	1p	y	n	n	sub.nomcl	THINK	NA	pos	NA	n	n	n	noef	ass	ass	dir	NA	NA	NA
. But this is to equivocate two senses of " rule. " The rules that a scientist may discover by noting the regularities in an animal's behavior are purely descriptive. The rules of morality are proscriptive, and, since they may be transgressed as often as they are adhered to, may not even be detectable by an observer of overt behavior. # Peterson's implicit)%>philosophy of morality seems to be tha…	546	332	MAY	COCA:2011:ACAD	ACAD	14	AmerScholar	neg.adv	NA	NA	ep	pos	ws	ep	disint	NA	pres	sim	presvb	NA	n	act	st	BE	n	3p	n	n	n	maincl	NA	decl	not	negprop	n	n	n	noef	ass	ass	dir	NA	m	EVEN
. But to come back to your question, I do n't think that I want my kids to follow my footsteps, no. My wife and I were very clear about that. Our feeling that the kids should follow what they feel is their calling. MICHEL-MARTIN# Obviously as a parent you must be very proud of your daughter - all of your children, but we're)%>talking about, you know, Lupita now. But what do you think is the meani…	547	283	MUST	COCA:2014:SPOK	SPOK	14	NPR	vb	NA	NA	ep	nec	ws	ep	disint	NA	pres	sim	presvb	NA	n	act	st	BE	n	2s	y	n	y	maincl	NA	decl	pos	NA	n	n	n	noef	ass	ass	dir	NA	initial	OBVIOUSLY
. But we did n't have to take it out of the hides of the elderly or out of kids or out of students, and yet we cut the deficit in half and the economy has been doing very well since we did that. That's the kind of example I think we need to use as we structure a balanced budget. We can do a balanced budget , but we can do it in a way that protects some fundamental priorities. I think it can be- I…	548	413	NEED TO	COCA:1995:SPOK	SPOK	14	ABC_Brinkley	vb	n	pres	root	nec	ns	subjextn	disint	n	pres	sim	presvb	NA	n	act	dyn	USE	n	1p	y	y	n	sub.nomcl	THINK	NA	pos	NA	n	n	n	noef	ass	ass	dir	NA	NA	NA
. By August of 1920 the situation was so desperate that the general in charge appealed to London not only for reinforcements but also for chemical weapons (mustard gas bombs or shells), though these turned out to be unavailable. # And this brings us to the second lesson the United States needs to learn from the British experience. Putting this rebellion down will require severity. In 1920, the Br…	549	282	NEED TO	COCA:2004:NEWS	NEWS	14	NYTimes	vb	n	pres	root	nec	ns	subjextn	disint	n	pres	sim	presvb	NA	n	act	dyn	LEARN	n	3s	y	y	n	sub.relcl	NA	NA	pos	NA	n	n	n	noef	ass	ass	dir	NA	NA	NA
. BYRON-PITTS# (Off-camera) That the mob could have attacked you? DONALD-JONES# Yeah. BYRON-PITTS# (Off-camera) So why'd you do it? DONALD-JONES# I do n't know. I mean, you ca n't just not do something. BYRON-PITTS# (Voiceover) What he still regrets all these years later, that he wasn't able to help that trucker, Reginald Denny, who was being beaten within an inchof his life on live television. D…	550	30	BE ABLE TO	COCA:2017:SPOK	SPOK	14	ABC: Nightline	vb	NA	pret	root	pos	ns	ab	subjint	n	past	sim	presvb	NA	n	act	dyn	HELP	n	3s	y	y	n	sub.nomcl	REGRET	NA	notc	negmod	n	n	n	noef	ass	ass	dir	NA	NA	NA
. Check the ZIP code maps on ajc.com to see how your house compares with the rest of your ZIP on sales and tax values. Also, what do you know about sales of other homes in your neighborhood ? Do home values seem to be going down? If so, the county may have overvalued your house for tax purposes. If you think that's the case)%>, go to step 3. # 3. File a form called a property tax return. List wha…	551	344	MAY	COCA:2009:NEWS	NEWS	14	Atlanta	vb	NA	NA	ep	pos	ws	ep	disint	NA	pres	ant	pfvbnc	ant	n	act	dyn	OVERVALUE	n	3s	y	y	n	maincl	NA	decl	pos	NA	n	n	n	noef	ass	ass	dir	NA	NA	NA
. Colonoscopy. You are now free to roam about the paper if you find this topic a little squirmy. We're actually talking about the worst thing about colonoscopies - that singularly and intentionally unsettling part of the festivities called '' prep. '' Colonoscopies are like painting your bedroom: The prep can be a bigger pain than the procedure. And calling it '' prep '' is)%>like calling Hurrica…	552	66	CAN	COCA:2015:NEWS	NEWS	14	Austin	vb	NA	NA	root	pos	ws	gsp	circ	NA	pres	sim	presvb	NA	n	act	st	BE	n	3s	n	n	n	maincl	NA	decl	pos	NA	n	n	n	noef	ass	ass	dir	NA	NA	NA
. CONAN: In the meantime, Israel - Israeli officials raising questions about how long they can wait. SHUSTER: Yeah, that - there was a lot of talk and a lot of reporting about both Prime Minister Netanyahu and the Defense Minister Ehuk Barak reported to believe that there should be - they should mount an attack on Iran's nuclear facilities. But I'll tell you something)%>that's very interesting, N…	553	323	SHOULD	COCA:2011:SPOK	SPOK	14	NPR_TalkNat	vb	NA	NA	ep	nec	ws	ep	disint	NA	pres	sim	presvb	NA	n	act	dyn	MOUNT	n	3p	y	y	n	sub.nomcl	BELIEVE	NA	pos	NA	n	n	n	noef	ass	ass	dir	NA	NA	NA
. Considering their lack of fortune, her daughters would have to marry for security, not attachment, and would do well to take whatever they might get, no matter how old or how dull. // Less easy for the good people of Whitward Street to excuse were the muffled sounds that might be heard from the street at odd hours or the flickering lights that could sometimes)%>be seen in one of the upper windo…	554	185	MIGHT	COCA:2008:FIC	FIC	13	Bk:MagiciansMrsQuent	vb	NA	NA	ep	pos	ws	ep	disint	NA	past	sim	presvb	NA	n	pas	st	HEAR	n	3p	n	n	n	sub.relcl	NA	NA	pos	NA	n	n	n	str	ass	ass	dir	NA	NA	NA
. Contributing Editor William Woys Weaver grows mustard, lettuce, and celeriac beneath tunnels covered with greenhouse-grade plastic. He says the key to overwintering vegetables is to plant early enough for the crops to develop a good root system. If planted by early September, lettuces will develop sufficient roots so they can survive winter and, by early April, will be growing strong again. #)%…	555	67	CAN	COCA:2015:MAG	MAG	13	MotherEarth	vb	NA	NA	root	pos	ns	ab	subjint	n	pres	sim	presvb	NA	n	act	st	SURVIVE	n	3p	y	n	y	sub.advcl	SO THAT	NA	pos	NA	n	n	n	noef	ass	ass	dir	NA	NA	NA
. Copyright 2002 by Guilford Press. Adapted with permission. # Figure 2. Instructional strategies flowchart. # 3705 Purpose: Students with intellectual disability often struggle with significant language delays or impairments and can require explicit instruction in language skills. The purpose of this study was to investigate)%>the effects of direct instruction on the use of and response to prepo…	556	68	CAN	COCA:2015:ACAD	ACAD	14	LangSpeechHearing	vb	NA	NA	root	pos	ws	gsp	circ	NA	pres	sim	presvb	NA	n	act	st	REQUIRE	n	3p	y	n	y	maincl	NA	decl	pos	NA	n	n	n	noef	ass	ass	dir	NA	NA	NA
. Crouse scored 55 goals as a sophomore and Fabean 45. " Prior to them going to Greensburg, I think a lot of people knew they were special players, " Rob Fabean said. " I think we knew that when they got together on the same team, they would be able to do some neat things together. '' But as much as their scoring abilitiesare alike, they are different players, at least in style. " She definitely …	557	222	BE ABLE TO	COCA:2013:NEWS	NEWS	14	Pittsburgh	vb	NA	pastfut	root	pos	ns	op	circ	n	fut	sim	presvb	NA	n	act	dyn	DO	n	3p	y	y	n	sub.nomcl	KNOW	NA	pos	NA	n	n	n	noef	ass	ass	dir	NA	e	TOGETHER
. Do you remember that? JANE-HARMAN, -FORME# I do. BLITZER# So I just want to caution all of our viewers right now, we do n't know who's responsible, we do n't know any motive , and some of the initial speculation could be way off. Well, it could be way off, but there is probably a review going on, again,)%>of what traffic, intelligence traffic, we saw before the race. And maybe things that did n…	559	462	COULD	COCA:2013:SPOK	SPOK	14	CNN	vb	NA	NA	ep	pos	ws	ep	disint	NA	pres	sim	presvb	NA	n	act	st	BE	n	3s	n	n	n	maincl	NA	decl	pos	NA	n	n	n	noef	ass	ass	dir	NA	NA	NA
. DONNA KELLEY: Good morning. DON SHEDD, The Real Santa Claus (LIVE): After hearing all of that, I'm tireder than I thought I was. LEON HARRIS: You might have missed your calling. If you can get Mach 3000 out of eight reindeer, you ought to be working at GM or NASA. DON SHEDD: Well, I'm glad to know those statistics because I've had those questions asked of me, and I've really had to say I really…	560	74	OUGHT TO	COCA:1995:SPOK	SPOK	14	CNN_News	vb	n	NA	ep	nec	ws	ep	disint	NA	pres	sim	presvb	NA	y	act	dyn	WORK	n	2s	y	y	n	maincl	NA	decl	pos	NA	n	n	n	noef	ass	ass	dir	NA	NA	NA
. Earlier in the evening, he could not zip his tent. Now he had laced his own boots. Clothes clean, no sign of a fall or struggle, he is holding a small branch in his hand, holding it like you might a walking stick. My dad, who must serve simultaneously as brother, oarsman, and priest, blesses the land and loads)%>the boat. In this story, the heroes do not live to see another day. I know my fathe…	561	465	MUST	COCA:2008:ACAD	ACAD	14	AmerScholar	vb	NA	NA	root	nec	ns	subjextn	circ	n	pres	sim	presvb	NA	n	act	dyn	SERVE	n	3s	y	y	n	sub.relcl	NA	NA	pos	NA	n	n	n	noef	ass	ass	dir	NA	ie	SIMULTANEOUSLY
. Even if an owner wins, it may be too late to stop the financial tailspin that the seizure caused. For the police agencies, though, there's little consequence for a wrongful seizure. State law is supposed to open the forfeiture process to public scrutiny. Police and sheriffs departments must compile yearly reports on their forfeitures, which lawmakers say should be posted on a)%>state website. B…	563	429	MUST	COCA:2013:NEWS	NEWS	14	Atlanta	vb	NA	NA	root	nec	ns	subjextn	rul	n	pres	sim	presvb	NA	n	act	dyn	COMPILE	n	3p	y	y	y	maincl	NA	decl	pos	NA	n	n	n	noef	ass	ass	dir	NA	NA	NA
. Even though it's old to us, it's new to them. You have to honor that. " Thirty minutes later, Mraz and his band bound onto the stage and open with " The Remedy . '' It's easily over 100 degrees in the packed room, and Mraz has to be tired of the tune, which he's running through for the fourth time today. But when he plucks the familiar first chords, the young, heavily female crowd is on its fee…	564	289	HAVE TO	COCA:2003:MAG	MAG	13	Entertainment	vb	n	pres	ep	nec	ws	ep	disint	NA	pres	sim	presvb	NA	n	act	st	BE	n	3s	y	n	n	maincl	NA	decl	pos	NA	n	n	n	noef	ass	ass	dir	NA	NA	NA
. Exercises to strengthen core muscles, via physiotherapy and, over the longer term, with something like Pilates, can help to improve pain and posture. # For those patients struggling with persistent pain, despite their clinician's efforts to adjust the analgesia used, a referral to a pain clinic may sometimes be the answer. Although this option can offer an alternative method of pain)%>relief fo…	565	190	MAY	COCA:2015:ACAD	ACAD	14	PracticeNurse	adv	NA	NA	ep	pos	ws	ep	disint	NA	pres	sim	presvb	NA	n	act	st	BE	n	3s	n	n	n	maincl	NA	decl	pos	NA	n	n	n	noef	ass	ass	dir	NA	m	SOMETIMES
. Few said goodbye. Most went in silence. The calm acceptance of death was no doubt familiar to Alegra, thanks to his long observation of the enemy, but knowing that the date of his death was a matter of chance, of where he happened to be in the hangar, must have been intolerable. Alegra could not abide chance; he needed order. # )%>Presumably, then, he felt a certain relief when, on the eighteen…	566	346	MUST	COCA:2006:FIC	FIC	13	NewYorker	vb	NA	NA	ep	nec	ws	ep	disint	NA	pres	ant	pfvbnc	ant	n	act	st	BE	n	3s	n	n	n	maincl	NA	decl	pos	NA	n	n	n	noef	ass	ass	dir	NA	NA	NA
. HANNITY: All right. So, where are you in your decision-making process? I just spoke to your husband, Todd is here, your kids are here. You are having a good time, this is an important time for the state of Iowa. We are told that Rick Perry may make an announcement. Where are you in your decision making? PALIN: And as)%>for Rick Perry, you know, I hope that he does jump into the race. The more t…	567	173	MAY	COCA:2011:SPOK	SPOK	14	Fox_Hannity	vb	NA	NA	ep	pos	ws	ep	disint	NA	pres	pos	presvb	NA	n	act	dyn	MAKE	n	3s	y	y	n	sub.nomcl	TELL	NA	pos	NA	n	n	n	noef	ass	ass	dir	NA	NA	NA
. HANSEN: You were out of there? Mr-DOUBEK: Yeah. I was furious at the time. I wanted to pack my bags and leave because I wanted no part of this show anymore after that happened . HANSEN: (Voiceover) But Phillip and some of the others still believed the show might be a once-in-a-lifetime opportunity, too good to give up. So that night,)%>the guys say they made a pact agreeing to stick around, but…	568	318	MIGHT	COCA:2009:SPOK	SPOK	14	NBC_Dateline	vb	NA	NA	ep	pos	ws	ep	disint	NA	pastsub	sim	presvb	NA	n	act	st	BE	n	3s	n	n	n	sub.nomcl	BELIEVE	NA	pos	NA	n	n	n	noef	ass	ass	dir	NA	NA	NA
. He did n't endure the agony of cancer. He did n't have a stillborn baby. Yet he bore all our afflictions, not just our sins, in his body as he hung on the cross (Isa. 53:46). Jesus felt and carried the weight of our pains, and can therefore sympathize with us in the midst of suffering. He bore them so that)%>, someday, we may be ultimately freed from them. # But there is a converse side. # GOD …	569	69	CAN	COCA:2015:MAG	MAG	13	ChristToday	adv	NA	NA	root	pos	ns	op	circ	n	pres	sim	presvb	NA	n	act	st	SYMPATHIZE	n	3s	y	n	n	maincl	NA	decl	pos	NA	n	n	n	noef	ass	ass	dir	NA	m	THEREFORE
. He has asked for an ISIS flag. Obviously, a nod to what sympathies he may have. Let me ask you. After the five people escaped -- and we believe they escaped because of the man 's reaction afterwards -- how did this situation inside change in terms of what you could see? Is that when the hostages started really being more up against the wall)%>? Were you able to see anything differently? REASON#…	570	343	COULD	COCA:2014:SPOK	SPOK	14	CNN	vb	NA	NA	root	pos	ws	gsp	circ	NA	past	sim	presvb	NA	n	act	st	SEE	n	2s	y	n	n	sub.nomcl	IN TERMS OF	NA	pos	NA	n	n	n	noef	dir	dir.ireq	dir	NA	NA	NA
. He said, " There was an incident with one of the whales. Alex is fine. " MERCEDES-MARTINEZ, # We noticed new ambulances and the company owners. RODRIGUEZ- (through# The owner was there with the director and their lawyers. He told us, '' There was nothing we could do. '' MARTINEZ# '' There was nothing we could do. '' '' What)%>? " They asked me if I wanted to see him. It was horrible. RODRIGUEZ#…	571	368	COULD	COCA:2013:SPOK	SPOK	14	CNN	vb	NA	NA	root	pos	ns	op	circ	n	past	sim	presvb	NA	n	act	dyn	DO	n	1p	y	y	n	sub.relcl	NA	NA	pos	NA	n	n	n	noef	ass	ass	indir	NA	NA	NA
.' He says,' When I saw the splintered shell of Ypres and heard hideous tales of German doings, I used to want to see the whole land of the Boche given up to fire and sword .' But then he realizes that would be an error:' To be able to laugh and to be merciful are the only things that make man better thanthe beasts.' // This does n't make Buchan a pacifist;' Mr. Standfast' begins with a pointed s…	572	387	BE ABLE TO	COCA:2008:NEWS	NEWS	14	NYTimes	vb	NA	toinf	root	pos	ns	ab	subjint	n	pres	sim	presvb	NA	n	act	dyn	LAUGH	n	NA	NA	NA	NA	maincl	NA	NA	pos	NA	n	n	n	noef	ass	ass	dir	NA	NA	NA
. He understood, shook his head, sympathized and said,' You should have come to us for the cap. The ones at the clinic are cheap ones and they go loose quickly. You should have told me about it.' That was very nice. That was what Adah ought to have done if she had known. But how was she supposed to know ? Smell it out like a witch doctor? Had he and his wife not put a notice in the waiting-room a…	573	251	OUGHT TO	COCA:1990:FIC	FIC	13	LiteraryRev	vb	n	NA	root	nec	ns	subjextn	circ	n	past	sim	pfvbnc	count	n	act	dyn	DO	n	3s	y	y	n	sub.nomcl	BE	NA	pos	NA	n	y	n	noef	ass	ass	dir	NA	NA	NA
. He was always wearing what he was wearing now, pretty much -- jeans and a thin flannel shirt, a straw cowboy hat that was battered and dirty. " I' m headed to Feed &; Seed , '' Wayne told him. '' If y' all can do what you need to do in under a half hour, come on. '' # Hector smiled. " Gracias, gracias, " he said, and then he called to the others in Spanish. They hurried over, piling into the ba…	574	61	NEED TO	COCA:2014:MAG	MAG	13	SatEvenPost	vb	n	pres	root	nec	ns	subjextn	circ	n	pres	sim	presvb	NA	n	act	dyn	DO	n	2p	y	y	n	sub.nomcl	DO	NA	pos	NA	n	n	n	noef	dir	dir.ord	indir	NA	NA	NA
. He was like, Why, I did n't have anything to do with that church bombing. I left that sign shop' -- this sign shop's like two and a half blocks from where the church blew up. I left that sign shop at a quarter to 10 because I had to get home and watch wrestling,' and -- which even to us as Southerners is pretty funny. But anyway -- so I got back to the newspaper and had our librarian, Susan Gra…	575	338	HAVE TO	COCA:2005:SPOK	SPOK	14	NPR_FreshAir	vb	n	pret	root	nec	ns	subjextn	circ	n	past	sim	presvb	NA	n	act	dyn	GET HOME	n	1s	y	y	n	sub.advcl	BECAUSE	NA	pos	NA	n	n	n	noef	ass	ass	dir	NA	NA	NA
. He would n't call himself a part of a majority among the donors, but he does n't believe he's alone, either. And even if the Buffs right themselves on the field, they literally can not afford to make too many people like Pilgim unhappy. # ' Maybe they need to get a little more creative with their fundraising,' he said.' Maybe they need to cultivate the little guy a little more. It's tough to de…	576	399	NEED TO	COCA:2000:NEWS	NEWS	14	Denver	vb	n	pres	root	nec	ns	subjextn	circ	n	pres	sim	presvb	NA	n	act	st	GET	n	3p	y	n	n	maincl	NA	decl	pos	NA	n	n	n	noef	ass	ass	dir	NA	initial	MAYBE
. He'd started spending a lot of time hanging out with friends and surfing, and I figured he'd just decided a life at the beach was good enough. # And anyway, people's dreams do n't always pan out. Believe me. I know. # I guess I should mention that Levi was the first boy I ever kissed. Yep... it sounds)%>like a big deal, and in a way I guess it was, but it was n't like we had some big hot and he…	577	2	SHOULD	COCA:2015:FIC	FIC	13	Bk:CatSittersWhiskers	vb	NA	NA	root	nec	ns	subjextn	circ	n	pres	sim	presvb	NA	n	act	dyn	MENTION	n	1s	y	y	n	sub.nomcl	GUESS	NA	pos	NA	n	n	n	noef	hedperf	hedperf.ass	dir	NA	NA	NA
. Here are five romantic dining spots at varying price points, complete with pairing suggestions and a story from a veteran server. Now, that's romantic dining at its finest. Ecco 40 7th St., Atlanta . 404-347-9555, www.ecco-Atlanta.com A good date spot because of: Table 61. Guests can make reservations specifically for this cushioned banquette, considered the best seat in the house)%>. Cozy up n…	578	70	CAN	COCA:2014:NEWS	NEWS	14	Atlanta	vb	NA	NA	root	pos	ws	gsp	circ	NA	pres	sim	presvb	NA	n	act	dyn	MAKE	n	3p	y	y	y	maincl	NA	decl	pos	NA	n	n	n	noef	ass	ass	dir	NA	ie	SPECIFICALLY
. Heres secretaries and business people and its just terrible. But you know, I just think that what New York has done has been a miracle. And I have to tell you, the firemen, the policemen, the Port Authority, incredible. But what the construction workers have been able to do in a seven-month period, because they had that site ready to goin seven months, is really almost a miracle. CAVUTO: Donald…	579	31	BE ABLE TO	COCA:2002:SPOK	SPOK	14	Fox_Cavuto	vb	NA	prespf	root	pos	ns	ab	subjint	y	pres	sim	presvb	NA	n	act	dyn	DO	n	3p	y	y	n	maincl	NA	NA	pos	NA	n	n	n	noef	exp	exp	indir	NA	NA	NA
. Honey held that letter in her heart as her real inheritance. Of far more value than the physical possessions Bea had left to her only niece had been her words of wisdom. One part, in particular , stayed with Honey always. # Don't ever settle for less when there could be so much more. Life is not meant to be lived in the shadows)%>. Do n't assume there is no welcome mat out there for you. I know…	580	236	COULD	COCA:2013:FIC	FIC	13	Bk:HoneyPie	vb	NA	NA	ep	pos	ws	ep	disint	NA	pres	sim	presvb	NA	n	act	st	BE	y	3s	n	n	n	sub.advcl	WHEN	NA	pos	NA	n	n	n	noef	dir	dir.sug	dir	NA	NA	NA
. I can instruct my agents to bribe corrupt officials there to bave your name listed as the owner of that account. You can then send a request to withdraw money and bave it transferred to another bank owned by a species friendly to me. To reward you for your assistance, you may keep 20.03% of these funds as a bounty. The president frowned. '' Obviously)%>the money is n't our major concern. If we …	581	357	MAY	COCA:2009:FIC	FIC	13	Analog	vb	NA	NA	root	pos	ns	perm	disint	n	pres	sim	presvb	NA	n	act	dyn	KEEP	n	2s	y	y	n	maincl	NA	decl	pos	NA	n	n	n	noef	com	com	indir	NA	NA	NA
. I fear he is as much a slave as Nat. Unlike Nat, however, he can not escape to freedom. " The bam door opened and the slave-catcher passed within. " Thomas, I think we must try again to have him stay the night with us. No man should be abroad in such -- '' A horse's furious squeal issued from the bam)%>, followed hy the sound of thumping so loud it could be heard clearly above the rain. The mar…	582	348	SHOULD	COCA:2013:FIC	FIC	13	FantasySciFi	vb	NA	NA	root	nec	ws	gsn	circ	NA	pres	sim	presvb	NA	n	act	st	BE	n	3s	y	n	y	maincl	NA	decl	n.subj	NA	n	n	n	noef	ass	ass	dir	NA	NA	NA
. I just kept telling them we're OK. My mind, I was praying. JESSICA-ORR, -TEACH# I said, father, protect us. I know you're stronger than this tornado and my kids were praying. The teachers were praying and I looked her in the eye and we could hear a roar. TODD# Breton teaches sixth grade at Briarwoord. Orr teaches fifth)%>grade. The kids they were protecting, 10 or 11 years old. (on-camera): Lyn…	583	14	COULD	COCA:2013:SPOK	SPOK	14	CNN	vb	NA	NA	root	pos	ws	gsp	circ	NA	past	sim	presvb	NA	n	act	st	HEAR	n	1s	y	n	y	maincl	NA	decl	pos	NA	n	n	n	noef	ass	ass	dir	NA	NA	NA
. I love opening up the world to kids in the way that professors opened up the world to me. And so I'm very happy. VAN-SUSTEREN: You were gone once before. You worked in the President Bush 41 administration. So you were gone and came back. So you may enjoy things now, but you could be back. RICE: What is better)%>than having been secretary of state? That's the best job in government. I've already…	584	130	MAY	COCA:2010:SPOK	SPOK	14	Fox_Susteren	vb	NA	NA	ep	pos	ws	ep	disint	NA	pres	sim	presvb	NA	n	act	st	ENJOY	n	2s	y	n	n	maincl	NA	decl	pos	NA	n	n	n	str	ass	ass	dir	NA	e	NOW
. I mean, they've gone out. They've convinced a lot of people. You know, what we're trying to do in the Congress is set up some basic ideas of defense and education and tax cuts that a president can run on, and I think Bush could be able to -- will be able to do that. And we hope that we'veset up a platform that we can have a successful candidate in the year 2000. And I think... HUME: It sounds l…	585	181	BE ABLE TO	COCA:1999:SPOK	SPOK	14	Fox_Hume	NA	NA	inf	root	pos	ns	ab	subjint	n	pres	sim	NA	NA	NA	NA	NA	NA	n	3s	y	y	n	sub.nomcl	THINK	NA	pos	NA	n	n	n	noef	ass	ass	dir	NA	NA	NA
. I mean, we've obviously done a lot right since then. A lot right. I mean, I do n't know that anybody is upset that we have n't been attacked again for seven-and-a-half years. The CIA has been a big part of that. I don't think we ought to be doing anything to tear down the agency that has helped protect us from another attack here on the homeland. VAN-SUSTEREN: And Vice President Cheney, I think…	586	41	OUGHT TO	COCA:2009:SPOK	SPOK	14	Fox_Susteren	vb	n	NA	root	nec	ns	subjextn	disint	n	pres	sim	presvb	NA	y	act	dyn	DO	n	1p	y	y	n	sub.nomcl	THINK	NA	n.rais	NA	n	n	n	noef	ass	ass	dir	NA	NA	NA
. I still do n't have any water. # He shrugged. Neither do I. Or your neighbors. Or your neighbors' neighbors. He gestured in the general direction of the nearest shop. Buy some bottled water for the time being. # But when will it return? # How should I know? # Sometimes, she wrote home, I just hate it here)%>. # VII. # Misto is a figan - Gypsy - word, her neighbor told her, tossing a clump of we…	587	279	SHOULD	COCA:2012:FIC	FIC	13	MassachRev	subjinv	NA	NA	root	nec	ns	subjextn	circ	n	pres	sim	presvb	NA	n	act	st	KNOW	n	1s	y	n	n	maincl	NA	int	pos	NA	n	n	n	noef	exp	exp	indir	NA	NA	NA
. I think it's important for those of us in a position of responsibility to be firm in sharing our experiences, to understand that the babies out of wedlock is a very difficult chore for mom and baby alike. I've taken a different approach than Miss Wolf. I believe we ought to teach children abstinence. I believe we ought to say there is a different alternative than the culture that is proposed by…	588	445	OUGHT TO	COCA:1999:SPOK	SPOK	14	NBC_MeetPress	vb	n	NA	root	nec	ns	subjextn	disint	n	pres	sim	presvb	NA	n	act	dyn	TEACH	n	1p	y	y	y	maincl	NA	decl	pos	NA	n	n	n	noef	ass	ass	dir	NA	NA	NA
. I think that you want to take on the cases that you think are right. And sometimes those cases are going to be popular and sometimes those cases are not going to be popular. Sometimes you're going to be able to win them and sometimes you're not going to be able to win them. But I think if you're a lawyer and you'resuccessful enough to have your choice of the cases, what you do is, you take on t…	589	466	BE ABLE TO	COCA:2005:SPOK	SPOK	14	CNN_King	vb	NA	toinf	root	pos	ws	gsp	circ	NA	fut	sim	presvb	NA	n	act	dyn	WIN	n	2s	y	y	y	maincl	NA	NA	not	negmod	n	n	n	noef	ass	ass	dir	NA	NA	NA
. I was a Tulane University history professor that August of 2005, when the hurricane hit town and dozens of levees were overrun. Contemplating this section of breached flood wall ten years later -- it's from the London Avenue Canal -- I'm astonished to remember that I thought this frail barrier could protect below-sea-level New Orleans neighborhoods from the Big One. # My flawed reasoning was)%>…	590	435	COULD	COCA:2015:MAG	MAG	13	Smithsonian	vb	NA	NA	root	pos	ns	ab	subjint	n	pastsub	sim	presvb	NA	n	act	dyn	PROTECT	n	3s	n	n	n	sub.nomcl	THINK	NA	pos	NA	n	n	n	noef	exp	exp	dir	NA	NA	NA
. If Abbas is to gain the confidence of the Israeli public, he must be prepared to sign an agreement that incorporates formal Palestinian acceptance of Israel as the nation-state of the Jewish people. Without this acknowledgment, even effective security cooperation will not win the full trust of the Israelis. Abbas must be made to understand that the only avenue to Palestinian independence -- whi…	591	295	MUST	COCA:2011:ACAD	ACAD	14	ForeignAffairs	vb	NA	NA	root	nec	ws	gsn	circ	NA	pres	sim	presvb	NA	n	pas	dyn	MAKE	n	3s	y	n	n	maincl	NA	decl	pos	NA	n	n	n	noef	ass	ass	dir	NA	NA	NA
. If someone is clinically diagnosable with Alzheimer's, it has been going on for years, " said Sid O'Bryant, interim director of the Institute for Aging and Alzheimer's Disease Research at the health science center . '' We need to be able to detect it earlier and earlier so we can create new ways to prevent the disease itself and do early treatment so we can)%>be most effective in treating our p…	592	71	CAN	COCA:2014:NEWS	NEWS	14	Pittsburgh	vb	NA	NA	root	pos	ws	gsp	circ	NA	pres	sim	presvb	NA	n	act	dyn	CREATE	n	1p	y	y	y	sub.advcl	SO THAT	NA	pos	NA	n	n	n	noef	ass	ass	dir	NA	NA	NA
. I'm in a hurry. I was just going out. (GONZALO pushes the door and enters the room.) GONZALO: I think you owe me an explanation. MARTA: Another one? I don't have any left. GONZALO: Where is Never? MARTA: You ought to know. She was at your place. Maybe she got tired and went out to get some fresh air. GONZALO: She's disappeared. You're the only one who has keys to the apartment and you knew I'd …	593	145	OUGHT TO	COCA:1993:FIC	FIC	13	WomenLanguage	vb	n	NA	root	nec	ns	subjextn	circ	n	pres	sim	presvb	NA	n	act	st	KNOW	n	2s	y	n	n	maincl	NA	decl	pos	NA	n	n	n	noef	ass	ass	dir	NA	NA	NA
. I'm not worried about it. Everything helps Republicans if you listen to them. Obama's gon na help Republicans. Hillary's gon na help Republicans. I mean, the sun coming up helps Republicans . Why don't they win some elections? GEORGE-STEPHANOPOU# (Off-camera) That's gon na have to be the last word today. And when we come back, thank you all very much. GEORGE-STEPHANOPOU# (Voiceover) President O…	594	110	HAVE TO	COCA:2014:SPOK	SPOK	14	ABC	vb	n	inf	root	nec	ws	gsn	circ	NA	fut	sim	presvb	NA	n	act	st	BE	n	3s	n	n	n	maincl	NA	decl	pos	NA	n	n	n	noef	ass	ass	dir	NA	e	TODAY
. In contrast, crops for the domestic market required less quality and thus needed less of the above mentioned tasks. # Firms producing NTECs in Petrolina-Juazeiro had to face the problem that the Northeast region offered a short supply of workers with the required skills. The next section will explain how firms had to train workers to perform the tasks needed in producing NTECs and why and how t…	595	443	HAVE TO	COCA:2003:ACAD	ACAD	14	LatinAmResRev	vb	n	pret	root	nec	ns	subjextn	circ	n	past	sim	presvb	NA	n	act	dyn	TRAIN	n	3p	y	y	y	sub.nomcl	EXPLAIN	NA	pos	NA	n	n	n	noef	ass	ass	dir	NA	NA	NA
. In order to facilitate similar experiences, the content of the lessons during this period were the same for both grades. However, in order to help provide opportunities for learners to experience optimal challenge, the instructor demonstrated adaptability and flexibility through the presentation of various tasks in which the students were able to select the degree of difficulty and choice of eq…	596	405	BE ABLE TO	COCA:2006:ACAD	ACAD	14	PhysicalEduc	vb	NA	pret	root	pos	ns	perm	rul	y	past	sim	presvb	NA	n	act	dyn	SELECT	n	3p	y	y	n	sub.relcl	NA	NA	pos	NA	n	n	n	noef	ass	ass	dir	NA	NA	NA
. In that wilderness he would n't last three days. He had kept himself in motion up until this moment, staying just ahead of the vast gray grimness that was threatening to invade his soul, but it was catching up with him now. Rackman went through ten or fifteen minutes that might have been the darkest, bleakest moments of his life. Then - was it)%>something about the sweet simplicity of this litt…	597	237	MIGHT	COCA:2007:FIC	FIC	13	FantasySciFi	vb	NA	NA	ep	pos	ws	ep	disint	NA	pres	ant	pfvbnc	ant	n	act	st	BE	n	3p	n	n	n	sub.relcl	NA	NA	pos	NA	n	n	n	noef	ass	ass	dir	NA	NA	NA
. In the 11 postseason series they contested in San Francisco before this year, they did n't have a rotation believed to have a clear-cut edge. There was too much Shawn Estes in the past, too much Scotty Garrelts, Atlee Hammaker and Sidney Ponson. For all we know, Texas might prove to be superior in the coming days with the likes of Lee, C.J.)%>Wilson, Colby Lewis and Neftali Feliz, but the forec…	598	199	MIGHT	COCA:2010:NEWS	NEWS	14	SanFranChron	vb	NA	NA	ep	pos	ws	ep	disint	NA	pres	sim	presvb	NA	n	act	st	PROVE	n	3s	y	n	n	maincl	NA	decl	pos	NA	n	n	n	noef	ass	ass	dir	NA	NA	NA
. In this article, we focus on a particular skill from the CCSS (i.e., solving an algebraic expression when letters stand for numbers, e.g., 5 - y = 2; y = 3) and provide an example of how to organize and document this alignment. # Table 1 may be used as a template for teaching other CCSS standards and skills in math or)%>other content areas. Mrs. Rodriguez used the CCSS sixth-grade math standard…	599	56	MAY	COCA:2013:ACAD	ACAD	14	TeachingExceptional	vb	NA	NA	root	pos	ws	gsp	circ	NA	pres	sim	presvb	NA	n	pas	dyn	USE	n	3s	n	n	n	maincl	NA	decl	pos	NA	n	n	n	str	ass	ass	dir	NA	NA	NA
. Increasingly rare in Delaware and often difficult to spot, the bird might be found beginning in early May in White Clay Creek State Park. # The warbler's return route in August through October is less well understood. It flies toward the central Gulf Coast of the United States and then may fly over the Caribbean between Cuba and the Yucatn Peninsula, rather than along Central)%>America, to reac…	600	141	MAY	COCA:2010:ACAD	ACAD	14	NaturalHist	vb	NA	NA	ep	pos	ws	ep	disint	NA	pres	pos	presvb	NA	n	act	dyn	FLY OVER	n	3s	y	y	y	maincl	NA	decl	pos	NA	y	n	n	noef	ass	ass	dir	NA	im	THEN
. Instead, Passantino argued that the law placed an unfair burden on the campaign to know that the contributions were all linked to the same individuals and organizations. # State law says an individual may not knowingly use multiple entities he controls to exceed the limits. But it also says no candidate may accept contributions that exceed allowable amounts. Passantino said that creates '' a st…	601	500	MAY	COCA:2012:NEWS	NEWS	14	Atlanta	vb	NA	NA	root	pos	ws	sitperm	rul	NA	pres	sim	presvb	NA	n	act	st	ACCEPT	n	3s	y	y	y	sub.nomcl	SAY	NA	n.subj	NA	n	n	n	str	ass	ass	dir	NA	NA	NA
. Intelligent men and women react intelligently. " Usually, but not always, unfortunately. " From all the documents I've read, none of the men in power after her father fell too ill to understand were intelligent enough to listen to her. Probably the only man in Telaryn who might have been was your brother, and he's much better off with Aelina. '')%># " Why do you say that? " # " Because you said…	602	472	MIGHT	COCA:2012:FIC	FIC	13	Bk:PrincepsNovelIn	vb	NA	NA	ep	pos	ws	ep	disint	NA	pres	ant	pfvbnc	ant	n	act	st	BE	n	3s	y	n	n	sub.relcl	NA	NA	pos	NA	n	n	n	noef	ass	ass	dir	NA	NA	NA
. It is going to be amazing. Any thoughts of a stint on the Champion's Tour at some point? I'll never be able to play golf again because of the injuries from my first accident. I can't completely close the pinky finger on my left hand, and I ca n't straighten my arm. The doctors told me I was lucky to still haveit. That has to be tough, having something you love taken away like that. Not really, …	603	72	CAN	COCA:2009:MAG	MAG	13	Bicycling	neg.vb	NA	NA	root	pos	ns	ab	subjint	n	pres	sim	presvb	NA	n	act	dyn	STRAIGHTEN	n	1s	y	y	n	maincl	NA	decl	notc	negmod	n	n	n	noef	ass	ass	dir	NA	NA	NA
. It is like magic. Simple math -- done in our minds alone -- reveals distances in the solar system. #' 4138166 relationships # An entirely different kingdom -- statistics -- provides astronomers with perhaps their greatest tool . It' s a perilous and often nonintuitive realm. For example, who could guess that when 24 or more people are in a room, statistics says that)%>two of them likely share a…	604	271	COULD	COCA:2013:MAG	MAG	13	Astronomy	vb	NA	NA	root	pos	ws	gsp	circ	NA	pres	sim	presvb	NA	n	act	st	GUESS	n	3s	y	n	n	maincl	NA	int	pos	NA	n	n	n	noef	exp	exp	indir	NA	NA	NA
. It is located in the Department of Housing and Urban Development, not the Treasury Department, which houses the Office of the Comptroller of the Currency, regulator of national banks, and the Office of Thrift Supervision , overseer of savings and loans. Also unlike them, the housing finance cop must win congressional approval for its budget each year -- even though its funds come from)%>the com…	605	408	MUST	COCA:2003:NEWS	NEWS	14	WashPost	vb	NA	NA	root	nec	ns	subjextn	rul	n	pres	sim	presvb	NA	n	act	dyn	WIN	n	3s	y	y	n	maincl	NA	decl	pos	NA	n	n	n	noef	ass	ass	dir	NA	NA	NA
. It would take more than breathing to distract the average woman from the bodily equivalent of a tsunami. You ca n't outrun the energy wave of a contraction. # But it was possible (at least sometimes ) to ride the wave, which completely changed my experience. When I was able to relax into the contractions and become present to them with the help of thebreathing, I could go along with what was ha…	606	228	BE ABLE TO	COCA:2005:MAG	MAG	13	Prevention	vb	NA	pret	root	pos	ns	op	circ	y	past	sim	presvb	NA	n	act	dyn	RELAX	n	1s	y	y	n	sub.advcl	WHEN	NA	pos	NA	n	n	n	noef	ass	ass	dir	NA	NA	NA
. It'd really hurt. " He waited with his hand around her arm. He' was quite strong; like everyone else he knew, he went to the gym and kept fit, and just when he had begun to consider how much she weighed and how long he'd be able to hold on to her if she leaped off the ledge and dangled there,he remembered to ask, " What's your' name? " " I wo n't tell you, " she said. " OK, yes, I will, ft's De…	607	350	BE ABLE TO	COCA:2014:FIC	FIC	13	KenyonRev	vb	NA	pastfut	root	pos	ns	ab	subjint	n	pastsub	sim	presvb	NA	n	act	dyn	HOLD ON TO	n	3s	y	y	n	sub.nomcl	CONSIDER	NA	pos	NA	n	n	n	noef	ass	ass	dir	NA	NA	NA
. It's no point in spending this much time on one word. We got a slowdown on our hands RANDALL Is that a political decision, not to use the word recession? Sec BRADY Not a bit . It's just my own way of thinking about it. I think we ought to face what's before us. We've got some tough times coming ahead , but it'll be some times for opportunities, as well RANDALL Well, whatever it is we are in, th…	608	11	OUGHT TO	COCA:1990:SPOK	SPOK	14	CNN_NewsSun	vb	n	NA	root	nec	ns	subjextn	disint	n	pres	sim	presvb	NA	n	act	dyn	FACE	n	1p	y	y	y	sub.nomcl	THINK	NA	pos	NA	n	n	n	noef	ass	ass	dir	NA	NA	NA
. It's not! Still, he was my favorite superhero when I was a kid. Him and Spider-Man, who was a bit of a vigilante, too. I took a deep breath. Damn the Lily. Damn the thieves. Damn Mr. Donatucci, that old man. He should have retired years ago. # Donatucci made his way as noisily as possible to)%>the arch between the kitchen and the dining room. I turned toward him just as he knew I would. He was …	609	17	SHOULD	COCA:2012:FIC	FIC	13	Bk:CurseJadeLilyMc	vb	NA	NA	root	nec	ns	subjextn	circ	n	past	sim	pfvbnc	count	n	act	dyn	RETIRE	n	3s	y	y	n	maincl	NA	decl	pos	NA	n	y	n	noef	ass	ass	dir	NA	NA	NA
. I've been telling Dearby that I've been visiting witb Althea because sbe has cancer and is dying. Altbea does have cancer and she is dying, but I've also been doing my old thing in ber house on her phone. Seems like bookies are back in style. I couldn't tell Dearby. because sbe'd want tbe money I'm making, and I)%>needed that money for Sovie. I also needed to tell you about your daughter and to…	610	347	COULD	COCA:2015:FIC	FIC	13	Atlantic	neg.vb	NA	NA	root	pos	ns	op	circ	n	past	sim	presvb	NA	n	act	dyn	TELL	n	1s	y	y	n	maincl	NA	decl	notc	negmod	n	n	n	noef	ass	ass	dir	NA	NA	NA
. JEFFREY-BROWN# But what you do see and you write about is -- and again we see this in the rest of society -- winners and losers. MICHAEL-KAISER# Absolutely. JEFFREY-BROWN# Some at the high end are going to do very well, you write, many at the low end, because they can get along basically on a shoestring. It's the great middle. MICHAEL-KAISER# It)%>'s the great middle that is at risk. And the gr…	611	73	CAN	COCA:2015:SPOK	SPOK	14	PBS	vb	NA	NA	root	pos	ws	gsp	circ	NA	pres	sim	presvb	NA	n	act	st	GET ALONG	n	3p	y	n	n	sub.advcl	BECAUSE	NA	pos	NA	n	n	n	noef	ass	ass	dir	NA	ie	BASICALLY
. John Boehner has reneged. He's gone back on his word. That's a terrible thing to say about him, but it's true. BURNETT# This whole Obamacare issue, we actually caught up with Kathleen Sebelius, Health and Human Services secretary, asked whether the health care law should be delayed because there have been some glitches. There's been some coverage but)%>not a lot because the whole coverage has b…	612	255	SHOULD	COCA:2013:SPOK	SPOK	14	CNN	vb	NA	NA	root	nec	ws	gsn	circ	NA	pastsub	sim	presvb	NA	n	pas	st	DELAY	n	3s	n	n	n	sub.nomcl	ASK	NA	pos	NA	n	n	n	noef	ass	ass	dir	NA	NA	NA
. KELLY-COBIELLA: Another potential threat, the seasons first tropical storm battered Mexicos Yucatan Peninsula Saturday night. Its back over water but forecasters predict it will stay far south of the spill. It gives BP time to refine its hurricane plan. Right now, all of the ships collecting oil would have to shut down and leave five days before a storm hit. Add in time to get everyone back in …	613	123	HAVE TO	COCA:2010:SPOK	SPOK	14	CBS_Early	vb	n	pastfut	root	nec	ns	subjextn	circ	n	pres	sim	presvb	NA	n	act	dyn	SHUT DOWN	n	3p	y	y	n	maincl	NA	decl	pos	NA	n	n	n	noef	ass	ass	dir	NA	initial	RIGHT NOW
. Kristina thought maybe Marianna could have taken the money, but Sasha defended her absent friend. " You do n't know her. She's not that sort of person. " Kristina looked out the window. The rain had returned, sheets of it sweeping across the parking lot. '' Could you have put it anywhere else? '' Sasha asked her. Kristina pressed her)%>lips together and did not answer. That night, Sasha could f…	614	105	COULD	COCA:2015:FIC	FIC	13	NewEnglandRev	subjinv	NA	NA	ep	pos	ws	ep	disint	NA	pres	ant	pfvbnc	past	n	act	dyn	PUT	n	2s	y	y	n	maincl	NA	int	pos	NA	n	n	n	noef	dir	dir.ireq	dir	NA	NA	NA
. Kristovsky? No... Krovich, that was it! I never forget anyone who makes me richer. " I bowed and kissed her hand a second time. " Do n't mention this to anyone else, '' I cautioned her. '' Remember, the killer's still at large and might decide to silence you. '' '' Oh, how thrilling! I do think)%>, Inspector, that this has been my most profoundly interesting visit here ever. I'll be silent as t…	615	177	MIGHT	COCA:2007:FIC	FIC	13	FantasySciFi	vb	NA	NA	ep	pos	ws	ep	disint	NA	pres	sim	presvb	NA	n	act	dyn	DECIDE	n	3s	y	y	n	maincl	NA	decl	pos	NA	n	n	n	noef	ass	ass	dir	NA	NA	NA
. KURTZ# Right. So, you're saying that Senate Democrats are getting a pass in the press? HOLMES# I believe they are. COX# they are, too. HENDERSON# I mean, everyone has talked about the Senate Democrats who were running for office in these red states and how they might be holding this up, too. COX# It sure got lost in the debate)%>of the filibuster that already some of the Senate Democrats and al…	616	129	MIGHT	COCA:2013:SPOK	SPOK	14	CNN	vb	NA	NA	ep	pos	ws	ep	disint	NA	pres	sim	presvb	NA	y	act	dyn	HOLD UP	n	3p	y	y	n	sub.nomcl	TALK ABOUT	NA	pos	NA	n	n	n	noef	ass	ass	dir	NA	NA	NA
. Last week, I woke up at 4 a.m. to two screaming children, one hungry, the other feverish. As I made a bottle and searched for medicine, my daughter started blowing raspberries. My son exploded in laughter, and I joined in. # This parenting thing, it may get easier. It may not. But now I know: I can totally)%>do this. Sidebar # YOUR TURN is a forum for the real parenting experts - you. We invite…	617	347	MAY	COCA:2011:MAG	MAG	13	TodaysParent	vb	NA	NA	ep	pos	ws	ep	disint	NA	pres	pos	presvb	NA	n	act	dyn	GET	n	3s	n	n	n	maincl	NA	decl	pos	NA	n	n	n	noef	ass	ass	dir	NA	NA	NA
. LAWYER-1MALE2-# I'm sorry. I'm not at liberty to talk about it. REPORTER-1MALE2-# Kim's attorneys are n't talking. He also allegedly had 40,000 pictures of tortured women. LAWYER-1MALE2-# Well, believe it or not, many of the images that Mr. Kim possessed, as disturbing as they might be, are not criminal. RON-NOBLE-1FORMER# We're still verifying exactly where he was)%>during her disappearance. W…	618	271	MIGHT	COCA:2008:SPOK	SPOK	14	ABC_20/20	vb	NA	NA	ep	pos	ws	ep	disint	NA	pres	sim	presvb	NA	n	act	st	BE	n	3p	n	n	n	sub.compcl	NA	NA	pos	NA	n	n	n	str	ass	ass	dir	NA	NA	NA
. Leave larger slow-growing beauties, such as oaks and elms, for some other part of the landscape. Look for one or two flowering j trees, or perhaps a couple of shade C trees with good fall foliage or an evergreen for winter wind protection and cover for the birds. You might M also consider planting one or two fruit trees such as an apple or pear)%>. Be aware that two fruit varieties often are re…	619	122	MIGHT	COCA:2007:MAG	MAG	13	MotherEarth	adv	NA	NA	root	pos	ns	op	circ	n	pres	sim	presvb	NA	n	act	dyn	CONSIDER	n	2s	y	y	n	maincl	NA	decl	pos	NA	n	n	n	noef	ass	ass	dir	NA	m	ALSO
. Lyle Hovitts. I'm surprised you did n't say Garth Landis. " # " There's nothing wrong with Garth Landis. " # " He's a tall, lanky goon! He's got that sloped nose and those gangly arms with the hairy hands at the end of them. Plushe must be fifty! '' # '' He's a fine-looking man. '' # My)%>gallbladder shook I laughed so hard. " Well, his beauty must be the kind that's magnified by liquor! " # " …	620	254	MUST	COCA:2012:FIC	FIC	13	Bk:GoodDream	vb	NA	NA	ep	nec	ws	ep	disint	NA	pres	sim	presvb	NA	n	act	st	BE	n	3s	y	n	n	maincl	NA	excl	pos	NA	n	n	n	noef	exp	exp	indir	NA	NA	NA
. Maryland's insurance commissioner has hinted that she will reject a rate hike averaging 25 percent proposed by CareFirst. But officials in many states lack that power. Then there's the danger that insurers will simply refuse to participate in the exchanges: Aetna corporate officers have told investors that the company might limit offerings or pull out of exchanges if they can't get sufficiently…	621	162	MIGHT	COCA:2013:MAG	MAG	13	NewRepublic	vb	NA	NA	ep	pos	ws	ep	disint	NA	pres	sim	presvb	NA	n	act	dyn	LIMIT	n	3s	y	y	n	sub.nomcl	TELL	NA	pos	NA	n	n	n	noef	ass	ass	dir	NA	NA	NA
. MEDICAL WASTE DEFINITIONS AND REGULATORY AGENCIES # An effective way to accomplish the task of cost-appropriate medical waste management is to examine what the words associated with medical waste actually mean. Then an effort must be made to take account of the facts surrounding infectious medical waste and the community and why there needs to be a strong push for medical waste regulation that …	622	310	NEED TO	COCA:1993:ACAD	ACAD	14	HospitalTopic	vb	n	pres	root	nec	ws	gsn	circ	NA	pres	sim	presvb	NA	n	act	st	BE	n	3s	n	n	n	sub.nomcl	TAKE ACCOUNT OF	NA	pos	NA	n	n	n	noef	ass	ass	dir	NA	NA	NA
. Mike confronts his boss, Roger. # MIKE: Wendy? She's been here two months! I've been breaking my back here for 18 years! # ROGER: I'm sorry. It came down to you and Wendy, but we felt like the new regional sales manager needed to be someone with a college degree. # MIKE: I could have had a college degree! # N4: Roger's earpiece for his cell phone flashes. He raises a finger to say " just a minu…	623	321	NEED TO	COCA:2009:ACAD	ACAD	14	ScholScope	vb	n	pret	root	nec	ws	gsn	circ	NA	pastsub	sim	presvb	NA	n	act	st	BE	n	3s	y	n	n	sub.nomcl	FEEL	NA	pos	NA	n	n	n	noef	ass	ass	dir	NA	NA	NA
. Miller agrees: " It would help enormously if boys were told, " your sense of humor and ability to be interesting matter.' It would help if girls heard, " No, you do n't have to be ultrathin. If you're best friends with a guy, he might make a good boyfriend.' There's so much misunderstanding between the sexes,)%>and adults seem unwilling to take a stand. " Teens are often equally clueless about …	624	294	MIGHT	COCA:2007:MAG	MAG	13	PsychToday	vb	NA	NA	ep	pos	ws	ep	disint	NA	pres	sim	presvb	NA	n	act	st	MAKE	n	3s	y	n	n	maincl	NA	decl	pos	NA	n	n	n	noef	ass	ass	dir	NA	NA	NA
. Monitor the water temperature to warm the tissue slowly for approximately 25 to 40 minutes. Do not pour warm water directly on the affected area because it will warm the tissue too quickly causing tissue damage. After the area is warmed, it may have a feeling of burning or numbness and may be puffy and blister. When normal feeling, movement, and skin color return)%>, dry the affected area and w…	625	301	MAY	COCA:2011:MAG	MAG	13	USAToday	vb	NA	NA	ep	pos	ws	ep	disint	NA	pres	sim	presvb	NA	n	act	st	BE	n	3s	n	n	n	maincl	NA	decl	pos	NA	n	n	n	noef	ass	ass	dir	NA	NA	NA
. More or fewer choices can be given to vary the difficulty level (i.e., adding letters that are not needed for the spelling of the word). Either vary the colors or use all the same color cubes within a task to avoid providing unintentional prompts. Of course, Reading Rods can be used instead, if they are available in your school. # Using letter)%>beads is another alternative for supporting fine …	626	74	CAN	COCA:2013:ACAD	ACAD	14	TeachingExceptional	vb	NA	NA	root	pos	ws	gsp	circ	NA	pres	sim	presvb	NA	n	pas	dyn	USE	n	3p	n	n	y	maincl	NA	decl	pos	NA	n	n	n	noef	ass	ass	dir	NA	e	INSTEAD
. MORIARTY: Wait a minute. You're gon na buy a book just because you think the author's cute? Woman 5: Not cute. Darling. He has a great personality. Woman 6: Personality. Woman 5: And if his personality's that good, then he ought to be able to write well. Mr-KIRSHBAUM: If we hadn't promoted this book, if we had n't gotten behind it... (Footage-of-women-d) Mr-KIRSHBAUM: (Voiceover)... if we had n…	627	288	OUGHT TO	COCA:1998:SPOK	SPOK	14	CBS_48Hours	vb	n	NA	root	nec	ns	subjextn	circ	n	pres	sim	presvb	NA	n	act	st	BE ABLE TO	n	3s	y	n	n	maincl	NA	decl	pos	NA	n	n	n	noef	ass	ass	dir	NA	NA	THEN+WELL
. Most of them despise walking. They eschew it. Bikes. Bikes are big. Two of them actually prefer climbing to walking. They agree that climbing from tree to tree is a far better way to cross town. One mentor says he can remember what it was like before he could walk, when he was crawling on his living-room foor. He liked that state)%>of being better. " Crawling is way better than walking. You get…	628	238	COULD	COCA:2014:MAG	MAG	13	Esquire	vb	NA	NA	root	pos	ns	ab	subjint	n	past	sim	presvb	NA	n	act	dyn	WALK	n	3s	y	y	n	sub.advcl	BEFORE	NA	pos	NA	n	n	n	noef	ass	ass	dir	NA	NA	NA
. Mr-VILSACK: Right. Now, on the other hand, we've got a third of our youngsters who are obese or at risk of being obese. KOTB: Right. So we've got the extremes . Mr-VILSACK: So this is an issue we have to deal with when youngsters may receive maybe a third to a half of their calories at school. KOTB:)%>Well, when you think about a school meal costs $1.31 -- and what we're going to do at 12:30 is…	629	463	MAY	COCA:2010:SPOK	SPOK	14	NBC_Today	vb	NA	NA	ep	pos	ws	ep	disint	NA	pres	sim	presvb	NA	n	act	dyn	RECEIVE	n	3p	y	n	y	sub.advcl	WHEN	NA	pos	NA	n	n	n	noef	ass	ass	dir	NA	ie	MAYBE
. Ms-CHATZKY: Well, you know, there's always the fear of theft. But even more than that, people have money, it runs through their fingers, they never are able to sort of manage their expenses. HENDERSON: You told me that ATMs are now going to be able to give us theater tickets, stamps, you can -- I mean, everything. Ms-CHATZKY: Well, already an ATM can perform a lot of different banking functions…	630	382	BE ABLE TO	COCA:1999:SPOK	SPOK	14	NBC_Today	vb	NA	toinf	root	pos	ns	ab	subjint	n	fut	sim	presvb	NA	n	act	dyn	GIVE	n	3p	y	y	y	sub.nomcl	TELL	NA	pos	NA	n	n	n	noef	dir	dir.areq	indir	NA	m	NOW
. NATALIE-MORALES# You're going to share. They'll share. AL ROKER: They're not going to share. NATALIE-MORALES# Anyway-- WILLIE-GEIST# No, no, no. AL ROKER: Seriously? NATALIE-MORALES# No. AL ROKER: Seriously? WILLIE-GEIST# No, no, you know them. NATALIE-MORALES# They may share in the pizza party. That's about it. AL ROKER: No)%>. These are the-- these are the same people that when we have to wor…	631	131	MAY	COCA:2014:SPOK	SPOK	14	NBC	vb	NA	NA	ep	pos	ws	ep	disint	NA	pres	sim	presvb	NA	n	act	dyn	SHARE IN	n	3p	y	y	n	maincl	NA	decl	pos	NA	n	n	n	noef	ass	ass	dir	NA	NA	NA
. Next to them lies a green napkin with the words THESE ARE EDIBLES, underscored and spelled out in capital letters. (Edibles, for the uninitiated, are pot-infused foods, hence the warning.) # This is neither the inner city nor the Fast Times at Ridgemont High pot scene one might imagine. These '' ganga-preneurs '' are educated, tech savvy, political, and)%>business minded. And all of them are wa…	632	322	MIGHT	COCA:2015:MAG	MAG	13	SatEvenPost	vb	NA	NA	ep	pos	ws	ep	disint	NA	pres	sim	presvb	NA	n	act	st	IMAGINE	n	3s	y	n	y	sub.relcl	NA	NA	pos	NA	n	n	n	noef	ass	ass	dir	NA	NA	NA
. Not a word was said as he simply signed his name and waited his turn. His heart was nearly beating out of his chest as he wondered how that woman behind the desk could look at him with such calmness. Her accomplice came from the back with a small package. He could see the glint of the needle that was contained in that inconspicuous plastic. Without)%>knowing quite how it worked, he knew that sm…	633	287	COULD	COCA:2013:FIC	FIC	13	JHumanMath	vb	NA	NA	root	pos	ws	gsp	circ	NA	past	sim	presvb	NA	n	act	st	SEE	n	3s	y	n	n	maincl	NA	decl	pos	NA	n	n	n	noef	ass	ass	dir	NA	NA	NA
. Not quite twenty years getting along this way. Every act of planning is a welldressed random act, even a plan as modest as the one hatched to get yourself out of one hole in the ground and into another hole in the ground, a long, winding hole in which you can buck up a bit, commiserate with your fellow NYD, a sad bunch not)%>even up to the standard you found at school. Timing, chance: we were a…	634	75	CAN	COCA:2015:FIC	FIC	13	WarLitArts	vb	NA	NA	root	pos	ws	gsp	circ	NA	pres	sim	presvb	NA	n	act	dyn	BUCK UP	n	2s	y	y	y	sub.relcl	NA	NA	pos	NA	n	n	n	noef	ass	ass	dir	NA	e	A BIT
. Not unless they've got enough leverage to deal with it, which he did n't as soon as we found his camera. " " Well, I've still got mine, " Delmer said. " Or my buddies do. But before I agree to join anything, maybe you ought to tell me just who I'd be joining. '' Leo nodded. '' Fair enough. You had it pretty close, you know. NASA and the Air Force are in on it, and most of the major defense cont…	635	297	OUGHT TO	COCA:2010:FIC	FIC	13	Bk:SpaceAliensTaught	vb	n	NA	root	nec	ns	subjextn	circ	n	pres	sim	presvb	NA	n	act	dyn	TELL	n	2s	y	y	n	maincl	NA	decl	pos	NA	n	n	n	noef	dir	dir.areq	indir	NA	NA	MAYBE+JUST
. Nothing was said about their ever going out together, or of her perhaps traveling up to Ann Arbor for a weekend at college. Paula thought maybe Jimmy was a little ashamed of himself, acting under the impulse the boys at school called horniness. After all, Lou Kogan's son ought to be able to do better than his little sister's girlfriend -- her, as Paula would have been the first to say, none-too…	636	54	OUGHT TO	COCA:1991:FIC	FIC	13	Commentary	vb	n	NA	root	nec	ns	subjextn	circ	n	pres	sim	presvb	NA	n	act	st	BE ABLE TO	n	3s	y	n	n	maincl	NA	decl	pos	NA	n	n	n	noef	ass	ass	dir	NA	initial	AFTER ALL
. Now that these so-called harbingers are looking to commit to more-binding relationships, we will have the " counterfactual " that Gary Gates talks about: we will be better able to tell which marital stresses and pleasures are due to gender, and which are not. # In the end, it could turn out that same-sex marriage isn't all that different from straight marriage. If)%>gay and lesbian marriages ar…	637	419	COULD	COCA:2013:MAG	MAG	13	Atlantic	vb	NA	NA	ep	pos	ws	ep	disint	NA	pres	sim	presvb	NA	n	act	st	TURN OUT	n	3s	n	n	n	maincl	NA	decl	pos	NA	n	n	n	noef	ass	ass	dir	NA	initial	IN THE END
. On Friday President Obama unveiled his updated national security strategy. It's a document that has been criticized by Republicans for outlining too cautious of an approach. Here is the President's National Security Adviser, Susan Rice outlining the new strategy. (BEGIN-VIDEO-CLIP) SUSAN-RICE, -NATION# While the dangers we face may be more numerous and varied, they are not of the existential na…	638	325	MAY	COCA:2015:SPOK	SPOK	14	NBC	vb	NA	NA	ep	pos	ws	ep	disint	NA	pres	sim	presvb	NA	n	act	st	BE	n	3p	n	n	n	sub.advcl	WHILE	NA	pos	NA	n	n	n	noef	ass	ass	dir	NA	NA	NA
. On one level, Mason learned that Perot is the folk hero he seems to be. Todd Mason (Wrote Unauthorized Perot Biography): The thing you have to say about Ross Perot is that any -- anyone who defines himself as the billionaire defender of the ordinary man ha -- has got to win your admiration. He loves to do that. He loves to bea -- a one-man action line, someone who gets results for -- for people…	639	461	HAVE TO	COCA:1992:SPOK	SPOK	14	NPR_ATC	vb	n	pres	root	nec	ns	subjintn	NA	n	pres	sim	presvb	NA	n	act	dyn	WIN	n	3s	y	y	n	sub.nomcl	BE	NA	pos	NA	n	n	n	noef	ass	ass	dir	NA	NA	NA
. On this issue, Ecuador has taken a more moderate position than Brazil. It accepts the fact that a serious problem exists and that the state has an obligation to deal with it responsibly, but it shares with Brazil and the other Amazon countries the idea that the means and policies needed ought to respect national self-determination and be placed under the exclusive countrol of the country itself…	640	202	OUGHT TO	COCA:1992:ACAD	ACAD	14	InterAmStud	vb	n	NA	root	nec	ns	subjextn	circ	n	pres	sim	presvb	NA	n	act	st	RESPECT	n	3p	n	n	n	sub.relcl	NA	NA	pos	NA	n	n	n	noef	ass	ass	dir	NA	NA	NA
. One of the most compelling counterarguments comes from the Spacewatch telescope in Arizona, which routinely sweeps up very small, faint objects in its ongoing survey of near-Earth objects. " If Frank's estimate for the impact rate is correct, '' notes Spacewatch observer James V. Scotti, '' then we ought to be finding thousands of these objects every night - and we aren't. " Whatever they are, …	641	388	OUGHT TO	COCA:1997:MAG	MAG	13	SkyTelescope	vb	n	NA	root	nec	ns	subjextn	circ	n	pres	sim	presvb	NA	y	act	dyn	FIND	n	1p	y	y	n	maincl	NA	decl	pos	NA	n	n	n	noef	ass	ass	dir	NA	NA	NA
. One reason for the low participation rates of students with disabilities in online learning programs may be the accessibility challenges these environments pose to students with disabilities, especially those who require accessible instructional materials (AIM). # Unfortunately, traditional approaches schools and teachers often use to provide students with AIM can not easily be applied to onlin…	642	76	CAN	COCA:2014:ACAD	ACAD	14	TeachingExceptional	neg.adv	NA	NA	root	pos	ws	gsp	circ	NA	pres	sim	presvb	NA	n	pas	dyn	APPLY	n	3p	n	n	y	maincl	NA	decl	not	negmod	n	n	n	noef	exp	exp	dir	NA	m	EASILY
. O'REILLY: All right. Kim, you want to respond? KIM-OSORIO-EDITOR: Yes, Jay-Z is someone that the kids in Detroit can relate to. He's coming from the same background. You know, he's representing the hip-hop community. And, you know, I think we need to look at him for what he's doing for the community in trying to uplift the community by going into the schools and talking to the kids, speaking fr…	643	109	NEED TO	COCA:2002:SPOK	SPOK	14	Fox_OReilly	vb	n	pres	root	nec	ns	subjextn	disint	n	pres	sim	presvb	NA	n	act	dyn	LOOK AT	n	1p	y	y	n	sub.nomcl	THINK	NA	pos	NA	n	n	n	noef	ass	ass	dir	NA	NA	NA
. Parents and teachers hold great sway over children's values, beliefs, and behavior patterns. Too little time and emphasis is placed on truth telling. We need to emphasize honesty, reward its presence, and work hard to decrease its absence. Honesty can not flourish in silence; we must talk about honesty and deception; its virtues, and its consequences. # We)%>can learn not to lie when we come to…	644	464	MUST	COCA:2004:ACAD	ACAD	14	InstrPsych	vb	NA	NA	root	nec	ns	subjextn	disint	n	pres	sim	presvb	NA	n	act	dyn	TALK	n	1p	y	y	y	maincl	NA	decl	pos	NA	n	n	n	noef	ass	ass	dir	NA	NA	NA
. PASTOR-MARK-LEWIS# He is planting terrors among the weak. SARAH-NOTTINGHAM# Something was going to happen. pumping me with fear. JIM-AVILA# (Voiceover) Sarah is terrified. She knew that Mark's wife had died a sudden, unexpected death, and now after watching him lose it with her, Sarah suspects Joanna may not have committed suicide at all. She reaches out to Joanna's mother,)%>Patricia, and now …	645	307	MAY	COCA:2014:SPOK	SPOK	14	ABC	neg.vb	NA	NA	ep	pos	ws	ep	disint	NA	pres	ant	pfvbnc	ant	n	act	dyn	COMMIT	n	3s	y	y	n	sub.nomcl	SUSPECT	NA	not	negprop	n	n	n	noef	ass	ass	dir	NA	e	AT ALL
. PETER JENNINGS: There have only been about 350, maybe 300 people in that church this morning. It's quite a small church. It has only about 15 rows of pews. It's a church that's important to the family. Some of the people who we have been able to recognize go in this morning are, indeed, familiar to Americans because theyare, in part, so famous. And some of them, in the case of Muhammad Ali, for…	646	104	BE ABLE TO	COCA:1999:SPOK	SPOK	14	ABC_Special	vb	NA	prespf	root	pos	ns	ab	subjint	y	pres	sim	presvb	NA	n	act	st	RECOGNIZE	n	1p	y	n	n	sub.relcl	NA	NA	pos	NA	n	n	n	noef	ass	ass	dir	NA	NA	NA
. Players will always cross the line. Those who cheat are taking money and jobs from others. It's fundamentally wrong. What I'd like to see from this is a 100 game ban for a first offense and a lifetime ban for a second. And there's something else that might work forfeits. As it stands, a player has nothing to lose and money)%>to gain by cheating. He runs the 24 hour news cycle, disappears withou…	647	184	MIGHT	COCA:2013:NEWS	NEWS	14	Denver	vb	NA	NA	ep	pos	ws	ep	disint	NA	pres	sim	presvb	NA	n	act	st	WORK	n	3s	n	n	n	sub.relcl	NA	NA	pos	NA	n	n	n	noef	ass	ass	dir	NA	NA	NA
. President-elect Obama has spoken out about that during the campaign. But secondly, I would agree with the caller, we absolutely have to have comprehensive immigration reform. Barack Obama's on record favoring that but I do think that we're going to need little time for this one because we have to do as he said, we have to deal with the economy, we deal with renewable energy and health care. Tho…	648	32	HAVE TO	COCA:2008:SPOK	SPOK	14	NPR_TalkNation	vb	n	pres	root	nec	ns	subjextn	disint	n	pres	sim	presvb	NA	n	act	dyn	DO	n	1p	y	y	n	sub.advcl	BECAUSE	NA	pos	NA	n	n	n	noef	ass	ass	dir	NA	NA	NA
. Prior to COUNTER, usage statistics would not allow for easy comparisons across platforms, and some librarians today would contend that cross-platform comparisons are not advisable because of interface issues that elevate counts for some platforms.4 A method that combines citation studies and usage analysis is needed to provide additional information, which could help inform subscription decisio…	649	136	COULD	COCA:2015:ACAD	ACAD	14	LibraryResources	vb	NA	NA	ep	pos	ws	ep	disint	NA	pres	sim	presvb	NA	n	act	dyn	HELP	n	3p	n	n	n	sub.relcl	NA	NA	pos	NA	n	n	n	noef	ass	ass	dir	NA	NA	NA
. Procedural know-how is passed on by one generation of specialists to the next, repeating a process that has resulted in no small degree of alienation. Researcher David Williams, in a recent edition of Music Educators Journal , argued that '' students can do more musically at home without us than they can at school with us. '' 12 The cycle of '' scholasticism '' --making musical study)%>a trade …	650	77	CAN	COCA:2014:ACAD	ACAD	14	MusicEduc	NA	NA	NA	root	pos	ns	op	circ	n	pres	sim	NA	NA	NA	NA	NA	NA	n	3p	y	y	y	sub.compcl	NA	NA	pos	NA	n	n	n	noef	ass	ass	dir	NA	NA	NA
. QUEEN-ELIZABETH-II# He's gon na be looking after you here. And I'm afraid there's always a photograph to add to it. PRESIDENT-JOHN-AGY# I'm going to cherish it. QUEEN-ELIZABETH-II# And - this is - this is a sort of - this is for you, yourself, which you might be able to do some toasts in or something. PRESIDENT-JOHN-AGY# I will be tempted)%>. ANNAN-CATO-1HIGH-# The Queen is saying to us,' Keep …	651	254	MIGHT	COCA:2008:SPOK	SPOK	14	ABC_20/20	vb	NA	NA	ep	pos	ws	ep	disint	NA	pres	sim	presvb	NA	n	act	st	BE ABLE TO	n	2s	y	n	n	sub.relcl	NA	NA	pos	NA	n	n	n	noef	ass	ass	dir	NA	NA	NA
. QUESTION: I was emptying out a drawer at my boyfriend's place -- he'd suggested I keep more clothes there -- when I found a woman's tank top. I confronted him, but he just shrugged and told me he hadn't known it was there; he said it must be an ex's. At best, it was inconsiderate of him, and)%>at worst, he's cheating. What do you think? ANSWER: I understand why finding some chick's clothes at y…	652	174	MUST	COCA:2010:MAG	MAG	13	Cosmopolitan	vb	NA	NA	ep	nec	ws	ep	disint	NA	pastsub	sim	presvb	NA	n	act	st	BE	n	3s	y	n	n	sub.nomcl	SAY	NA	pos	NA	n	n	n	noef	ass	ass	dir	NA	NA	NA
. RICHARD-SCHLESINGE# The judge did n't go that far. She sentenced Linda Cooney to thirteen to forty years in prison. You think that even with her in prison, conceivably for the rest of her life, they 'll still be tied to her? MICHAEL-STAUDAHER# One would hope that they can-- they could break off and- - and live their own lives. Whether it can happen or)%>not with her, I do n't know. RICHARD-SCHL…	653	332	COULD	COCA:2015:SPOK	SPOK	14	CBS	vb	NA	NA	root	pos	ns	op	circ	n	fut	sim	presvb	NA	n	act	dyn	BREAK OFF	n	3p	y	y	n	sub.nomcl	HOPE	NA	pos	NA	n	n	n	noef	ass	ass	dir	NA	NA	NA
.' s fault even though we had voted in the U.N. to proceed or change our mission in Somalia, for example. And then, of course, I think we did n't look too good in having the mob turn us back from Port-au-Prince. But my view is that we ought to look at these things before we commit the troops and not let any president make a mistake and then cut off funds and say,' Bring the American boys home.' I…	654	63	OUGHT TO	COCA:1993:SPOK	SPOK	14	ABC_Brinkley	vb	n	NA	root	nec	ns	subjextn	disint	n	pres	sim	presvb	NA	n	act	dyn	LOOK AT	n	1p	y	y	y	sub.nomcl	BE	NA	pos	NA	n	n	n	noef	ass	ass	dir	NA	NA	NA
. Salmon et al19 showed that school personnel attitudes and knowledge were easily conveyed to parents of school-aged children. School personnel who do not feel the vaccine is safe and do not identify children as a recommended vaccination group do not recommend it to the parents, and those who hold misconceptions about influenza may actually provide false information. Salmon et al 19 also showed t…	655	283	MAY	COCA:2013:ACAD	ACAD	14	JournalSchoolHealth	adv	NA	NA	ep	pos	ws	ep	disint	NA	pres	sim	presvb	NA	n	act	dyn	PROVIDE	n	3p	y	y	y	maincl	NA	decl	pos	NA	n	n	n	noef	ass	ass	dir	NA	m	ACTUALLY
. Selected teachers prefer, instead, to write short answer test items. Here, there are no blanks to fill in. Rather there are questions which require a very brief answer, generally a factual response. Facts provide building blocks for higher levels of cognition. This means that the teacher needs to be very careful with not testing pupils on trivia and the insignificant. # Fifth, for more open end…	656	297	NEED TO	COCA:2004:ACAD	ACAD	14	InstrPsych	vb	n	pres	root	nec	ns	subjextn	circ	n	pres	sim	presvb	NA	n	act	st	BE	n	3s	y	n	y	sub.nomcl	MEAN	NA	pos	NA	n	n	n	noef	ass	ass	dir	NA	NA	NA
. Several are co-opted, with their personnel given lucrative positions or even ministerial portfolios in exchange for silence. Others are intimidated. On December 6, 2005, a KDP mob stormed the office of the Kurdistan Islamic Union in the Duhok governorate and shot and killed its candidate. While new parties might form, the KDP and PUK can control their licensing through the Ministry of Internal)…	657	164	MIGHT	COCA:2007:ACAD	ACAD	14	MiddleEastQ	vb	NA	NA	ep	pos	ws	ep	disint	NA	pres	sim	presvb	NA	n	act	dyn	FORM	n	3p	n	n	n	sub.advcl	WHILE	NA	pos	NA	n	n	n	noef	ass	ass	dir	NA	NA	NA
. She called the florist again and ordered an identical arrangement to be sent immediately to May-Annlouise at her workplace. # Why did Garrett feel compelled to tell his wife whenever he spent time with Adriane? And how many details had May-Annlouise dragged out of'him? Adriane was livid. She believed there ought to be a commandment against people like May-Annlouise Hughes. # '' And on the note?…	658	369	OUGHT TO	COCA:2000:FIC	FIC	13	SouthernRev	vb	n	NA	root	nec	ws	gsn	disint	NA	pastsub	sim	presvb	NA	n	act	st	BE	n	3s	n	n	n	maincl	NA	decl	pos	NA	n	n	n	noef	ass	ass	indir	NA	NA	NA
. She has her sights set on a 58-minute Bolder Boulder on Monday. # " You can either get into an upward spiral or a downward spiral, " Calhoun said of resisting the aging process. " The less you do, the less you want to do, the less you are able to do. The more you do, the more you want to do,the more you are able to do. " # Just more than 18 percent of the participants in the Bolder Boulder last…	659	214	BE ABLE TO	COCA:2007:NEWS	NEWS	14	Denver	vb	NA	pres	root	pos	ws	gsp	circ	NA	pres	sim	presvb	NA	n	act	dyn	DO	n	2s	y	y	y	maincl	NA	decl	pos	NA	n	n	n	noef	ass	ass	dir	NA	NA	NA
. She is the mother of two of his children. (END-VIDEO-CLIP) BANFIELD: Tonight, the dramatic new details about Debbie Rowes relationship with Michael Jackson. Plus, late-breaking developments in the battle for Michaels kids. Could Blankets mom come forward and fight for custody? And will all the Jackson kids have to speak in open court? And Jon fights back. '' Jon & Kates " just-separated Jon spe…	660	126	HAVE TO	COCA:2009:SPOK	SPOK	14	CNN_Showbiz	vb	n	fut	root	nec	ns	subjextn	rul	n	fut	sim	presvb	NA	n	act	dyn	SPEAK	n	3p	y	y	n	maincl	NA	decl	pos	NA	n	n	n	noef	com	com	indir	NA	NA	NA
. She wanted to go right back to Switzerland. " # REGER AND THE CENTRAL AMERICAN PATIENT proved that humans could survive, indeed thrive, with no pulse. But Frazier and Cohn were attempting to achieve intentionally what those patients had done inadvertently. Rather than augmenting an existing heart, which may lack sufficient strength and is in any case full of crannies that can grow dangerous)%>c…	661	235	MAY	COCA:2012:MAG	MAG	13	PopScience	vb	NA	NA	ep	pos	ws	ep	disint	NA	pres	sim	presvb	NA	n	act	st	LACK	n	3s	n	n	n	sub.relcl	NA	NA	pos	NA	n	n	n	noef	ass	ass	dir	NA	NA	NA
. Silly, huh? He smiled kindly. He hoped he had n't upset her by talking about it. # No, Roberta said. No, no. Not at all. # She did n't remember him. He couldn't have been in Cheryl's grade, anyway; he must be mistaken. There was a dusting of gray in his short hair, and)%>his eyes, friendly, tired, were not the eyes of a young man. # She was making a list of what was taken, everything she could …	662	382	MUST	COCA:2002:FIC	FIC	13	SouthernRev	vb	NA	NA	ep	nec	ws	ep	disint	NA	pres	sim	presvb	NA	n	act	st	BE	n	3s	y	n	n	maincl	NA	decl	pos	NA	n	n	n	noef	ass	ass	dir	NA	NA	NA
. Skwerl dove towards him, sliding on his stomach, wrapping his arms around him as though he were second base and this a ballgame. Shane lifted his head. His face was clammy and doughy white. He almost smiled, gullible enough to believe Skwerl had saved him and that he might survive. Skwerl wanted to say something. '' Fuck, fuck, fuck,)%>fuck, fuck, fuck, " is all that came out. Skwerl sat up and…	663	41	MIGHT	COCA:2014:FIC	FIC	13	WarLitArts	vb	NA	NA	ep	pos	ws	ep	disint	NA	past	sim	presvb	NA	n	act	st	SURVIVE	n	3s	y	n	n	sub.nomcl	BELIEVE	NA	pos	NA	n	n	n	noef	exp	exp	indir	NA	NA	NA
. So given success, they're pushing ahead. They're going to see now if they can intimidate Poland or if they can intimidate other Europeans. That's why I think the president's coming forward has been very important, but we need to rally the Europeans. And they Europeans need to stand up to the Russians on this point. KASICH: So John, for the average person watching this show, it's the fact that t…	664	72	NEED TO	COCA:2008:SPOK	SPOK	14	Fox_OReilly	vb	n	pres	root	nec	ns	subjextn	disint	n	pres	sim	presvb	NA	n	act	dyn	STAND UP	n	3p	y	y	n	maincl	NA	decl	pos	NA	n	n	n	noef	ass	ass	dir	NA	NA	NA
. So if you have an ID badge that has your face on it and maybe a bar code, and then you back that up with a biometric, that is, a body-based system, then you've got two things that can check against each other. The bad guy may be able to steal your ID card, he's not going to be able to stealyour hand. He might be able to break through the hand-card system, somehow, by hacking into it, but then h…	665	258	BE ABLE TO	COCA:2001:SPOK	SPOK	14	NPR_Sunday	vb	NA	inf	root	pos	ns	op	circ	n	pres	sim	presvb	NA	n	act	dyn	STEAL	n	3s	y	y	y	maincl	NA	decl	pos	NA	n	n	n	noef	ass	ass	dir	NA	NA	NA
. So no matter what kind of nonsense the judges start spouting, suffer in silence. Let the voters stick up for you. Thou shalt not make excuses. Are you nervous? Good, you should be . Did you screw up? Fine, happens to everybody. Besides, we may not have even noticed. Unless you tell us. Then, not only do)%>you look weak, but we feel stupid. We do n't vote for people who make us feel stupid. Earl…	666	209	MAY	COCA:2013:NEWS	NEWS	14	USAToday	neg.vb	NA	NA	ep	pos	ws	ep	disint	NA	pres	ant	pfvbnc	ant	n	act	st	NOTICE	n	1p	y	n	n	maincl	NA	decl	not	negprop	n	n	n	noef	ass	ass	indir	NA	m	EVEN
. So then if they bring it back, they'd better do it overnight, you know, so that people are n't doing in their parents in anticipation. JAKE-TAPPER-1-ABC# (Off-camera) Donna, you wanted to say something ? DONNA-BRAZILE-1-A# (Off-camera) Everyone is concerned about the deficit, and that's why we have to be careful how we frame this. I mean, you and I both know that - Stephen, that over the last 1…	667	158	HAVE TO	COCA:2010:SPOK	SPOK	14	ABC_ThisWeek	vb	n	pres	root	nec	ns	subjextn	circ	n	pres	sim	presvb	NA	n	act	st	BE	n	1p	y	n	n	sub.nomcl	BE	NA	pos	NA	n	n	n	noef	ass	ass	dir	NA	NA	NA
. So they were not able to properly conduct the primary crucial phase of the investigation. Well, a new report shows Iran is expanding its nuclear activities. The International Atomic Energy Agency also says there is evidence that Iran has been paving over the crucial Parchin military base where inspectors suspect Iran may have conducted explosive tests. The report comes after Iran's top nuclear …	668	331	MAY	COCA:2013:SPOK	SPOK	14	CNN	vb	NA	NA	ep	pos	ws	ep	disint	NA	pres	ant	pfvbnc	ant	n	act	dyn	CONDUCT	n	3s	y	y	n	sub.relcl	NA	NA	pos	NA	n	n	n	noef	ass	ass	dir	NA	NA	NA
. So when one of those indicators started acting up today, we decided it was time to quit. HARRIS: The most vexing thing about the problem is that it's been kicking around for a few months . NASA administrator Michael Griffin says try as they might, engineers have not been able to pinpoint the cause, and that's disconcerting because it can suddenly appear andsuddenly disappear. Griffin says the l…	669	72	BE ABLE TO	COCA:2005:SPOK	SPOK	14	NPR_Morning	vb	NA	prespf	root	pos	ns	ab	subjint	n	pres	sim	presvb	NA	n	act	dyn	PINPOINT	n	3p	y	y	y	sub.nomcl	SAY	NA	not	negmod	n	n	n	noef	ass	ass	indir	NA	NA	NA
. Start building up your tolerance now. Tickets start at $15. brewmastersinternational beerfestival.com # International Quilt Festival: More than 1,100 vendor booths are expected, and more than 1,500 quilts will be on display at this event, held Nov. 3-5 at the George R. Brown Con-vention Center in Houston. Attendees also may choose to take classes covering everything from needlefelting to longar…	670	494	MAY	COCA:2011:NEWS	NEWS	14	Houston	vb	NA	NA	root	pos	ns	op	circ	n	pres	sim	presvb	NA	n	act	dyn	CHOOSE	n	3p	y	y	y	maincl	NA	decl	pos	NA	n	n	n	noef	ass	ass	dir	NA	im	ALSO
. Students with Early Advanced and Advanced levels of ELP did not differ in their initial status for reading words (ORF) at the fall of second grade. Thus, ELP level was associated with greater initial status at the beginning of the second grade, such that students with Advanced ELP were able to read more words than students with lower ELP levels (see Figure 1). # Differences in NWF Initial Statu…	671	199	BE ABLE TO	COCA:2013:ACAD	ACAD	14	SchoolPsych	vb	NA	pret	root	pos	ns	ab	subjint	y	past	sim	presvb	NA	n	act	dyn	READ	n	3p	y	y	y	sub.advcl	SUCH THAT	NA	pos	NA	n	n	n	noef	ass	ass	dir	NA	NA	NA
. Such a predisposition, if extant, would lie psychologically in the realm of long-term visual memory. # Memory for visual materials can be long lived and effective. In an early study, Rock and Engelstein (1959) examined memory for a single abstract shape and found that respondents were still able to recognize the shape 1 month after encoding, although the ability to draw itdeclined. In another e…	672	325	BE ABLE TO	COCA:2002:ACAD	ACAD	14	Psychology	vb	NA	pret	root	pos	ns	ab	subjint	y	past	sim	presvb	NA	n	act	st	RECOGNIZE	n	3p	y	n	y	sub.nomcl	FIND	NA	pos	NA	n	n	n	noef	ass	ass	dir	NA	m	STILL
. Surrounded by oak paneling as deeply polished as their awaiting coffins, the Club's ambulatory elite gathered to share whispered confidences about prostate surgery and defecting in-laws. " An old man's milk, " Frazier exclaimed , holding his vodka gimlet up to the muted yellow light. '' You really ought to try one of these. '' '' Lunch is on me, '' Harris said. Frazier watched his usual luncheo…	673	107	OUGHT TO	COCA:2015:FIC	FIC	13	LegalStudiesForum	vb	n	NA	root	nec	ns	subjextn	disint	n	pres	sim	presvb	NA	n	act	dyn	TRY	n	2s	y	y	n	maincl	NA	decl	pos	NA	n	n	n	noef	dir	dir.sug	dir	str	im	REALLY
. Take a look at some NBC Election Night coverage. Unidentified Reporter: (November 8, 1988) The very fact that it seemed to be fairly close even into the final week, despite the fact that Mike Dukakis had run a fairly weak campaign, is an indication that George Bush might have been beatable. TIM-RUSSERT-report: (November-3-1992) I had an opportunity to talk to a senior)%>Bush adviser and ask the…	674	482	MIGHT	COCA:2008:SPOK	SPOK	14	NBC_Matthews	vb	NA	NA	ep	pos	ws	ep	disint	NA	pres	ant	presvb	NA	n	act	st	BE	n	3s	y	n	n	sub.relcl	NA	NA	pos	NA	n	n	n	noef	ass	ass	dir	NA	NA	NA
. That or he's in love with Helen. KATE: (Pause) I think Billy's in love with Helen on top of it. En.EEN: I think Billy's in love with Helen. It 'll all end in tears. KATE: Tears or death. N: We ought look on the bright side. KATE: Tears, death or worse. Johnnyenters, strutting. EILEEN: Johnnypateenmike. KATE: Johnnypateenmike. JOHNNY: Johnnypateen does have three pieces of news to be telling ye …	675	498	OUGHT TO	COCA:1997:FIC	FIC	13	ParisRev	vb	n	NA	root	nec	ns	subjextn	disint	n	pres	sim	presvb	NA	n	act	dyn	LOOK	n	1p	y	y	n	maincl	NA	decl	pos	NA	n	n	n	noef	dir	dir.sug	dir	NA	NA	NA
. That will keep all of the information safe, until the document is opened by the bearer. Mr-MOSS: That as long as these two objects, or these two technologies, are in close proximity, it can't be read. Yet you open the book, and now you're able to access the chip electronically. We will only release these to the public whenwe're confident that we have addressed the risk of skimming. ABRAMSON: En…	676	266	BE ABLE TO	COCA:2005:SPOK	SPOK	14	NPR_ATCW	vb	NA	pres	root	pos	ws	gsp	circ	NA	pres	sim	presvb	NA	n	act	dyn	ACCESS	n	2s	y	y	y	maincl	NA	decl	pos	NA	n	n	n	noef	ass	ass	dir	NA	NA	NOW+ELECTRONICALLY
. That's not what it's about. It's about sitting around and enjoying a cocktail. BECKEL# Yes. GUTFELD# I offer, at my apartment, I have a drinking age of 18. And I offer classes. They are free. You just bring me alcohol. BOLLING# I shouldn't everyone be able to drink at 18, though? Why just the military)%>? Which, by the way, -- GUTFELD# I would say start with 18. I'm OK. I'm OK. Drink at 18. it'…	677	219	SHOULD	COCA:2013:SPOK	SPOK	14	Fox	subjinv	NA	NA	root	nec	ws	gsn	rul	NA	pres	sim	presvb	NA	n	act	st	BE ABLE TO	n	1s	y	n	y	maincl	NA	int	notc	negprop	n	n	n	noef	ass	ass	dir	NA	NA	NA
. That's why the co-chair of the Denver Trump campaign announced on the Fourth of July he's running for governor - nominally on the Republican ticket, although he could as well be running on the Trump ticket . # '' Part of my run for governor is to ensure that Colorado is able to vote for Donald Trump in the next election, '' the Denver real estateand art salesman told Colorado Politics. " They k…	678	447	BE ABLE TO	COCA:2017:NEWS	NEWS	14	Colorado Springs Gazette	vb	NA	pres	root	pos	ns	op	circ	n	pres	sim	presvb	NA	n	act	dyn	VOTE	n	3s	y	y	n	sub.nomcl	ENSURE	NA	pos	NA	n	n	n	noef	ass	ass	dir	NA	NA	NA
. The artist who makes the Komo mask must be a blacksmith, a wood carver, and a member of the Komo society. Among Tagwa, the Komo mask's carver never works without a commission. Each Komo mask is carved in the name of a Komotigui. Not all blacksmiths are able to carve Komo masks.INITIATION To be initiated to the Komo society means first, tobe authorized to see the Komo in all cycles and all place…	679	250	BE ABLE TO	COCA:2008:ACAD	ACAD	14	AfricanArts	vb	NA	pres	root	pos	ns	ab	subjint	n	pres	sim	presvb	NA	n	act	dyn	CARVE	n	3p	y	y	n	maincl	NA	decl	n.subj	NA	n	n	n	noef	dir	dir.ord	indir	NA	NA	NA
. The California border is increasingly fenced (fences do work, contrary to rumor), and that leaves Arizona and New Mexico. Arizona is almost all " protected " federal land, and that means protected from rude incursions by the Border Patrol. In many areas, the Border Patrol people must exit their SUVs and proceed across dangerous and inhospitable terrain on horseback. Or foot)%>. That's the story…	680	475	MUST	COCA:2010:MAG	MAG	13	AmSpect	vb	NA	NA	root	nec	ns	subjextn	circ	n	pres	sim	presvb	NA	n	act	dyn	EXIT	n	3p	y	y	y	maincl	NA	decl	pos	NA	n	n	n	noef	ass	ass	dir	NA	NA	NA
[truncated: 4,263 more rows]

## Sheet: values
FEATURE	VALUE	DEFINITION	BIBLIO	EXAMPLE	TIPS
F_NEXT	vb	Lexical verb: A first possibility is to have the lexical verb following the modal.		Teachers should encourage the students to use descriptive words and grammatically correct statements.
[truncated: 177 more rows]
